# Supplementary material for: The Palmitoyltransferases ZDHHC6 and ABHD17A Modulate Type 2 Diabetes Risk via Genetic Causality and Molecular Interactions
Source: Research Square preprint supplement (doi:10.21203/rs.3.rs-6697832/v1), 2025-07-31

# Palmitoyltransferase ZDHHC6 and ABHD17A Modulate Type 2 Diabetes Risk via Genetic Causality and Molecular Interactions

**Supplement Data**

## Directory

[Supplement Figure 1. Forest plots for all causal effects of S-acylation and deacylation enzymes on diabetes mellitus and sensitivity analyses. 2](#_Toc195207936)

[Supplement Figure 2. Visualization of eQTL-GWAS colocalization by locuscompare plot. 15](#_Toc195207937)

Supplement Figure 1. Forest plots for all causal effects of S-acylation and deacylation enzymes on diabetes mellitus and sensitivity analyses.


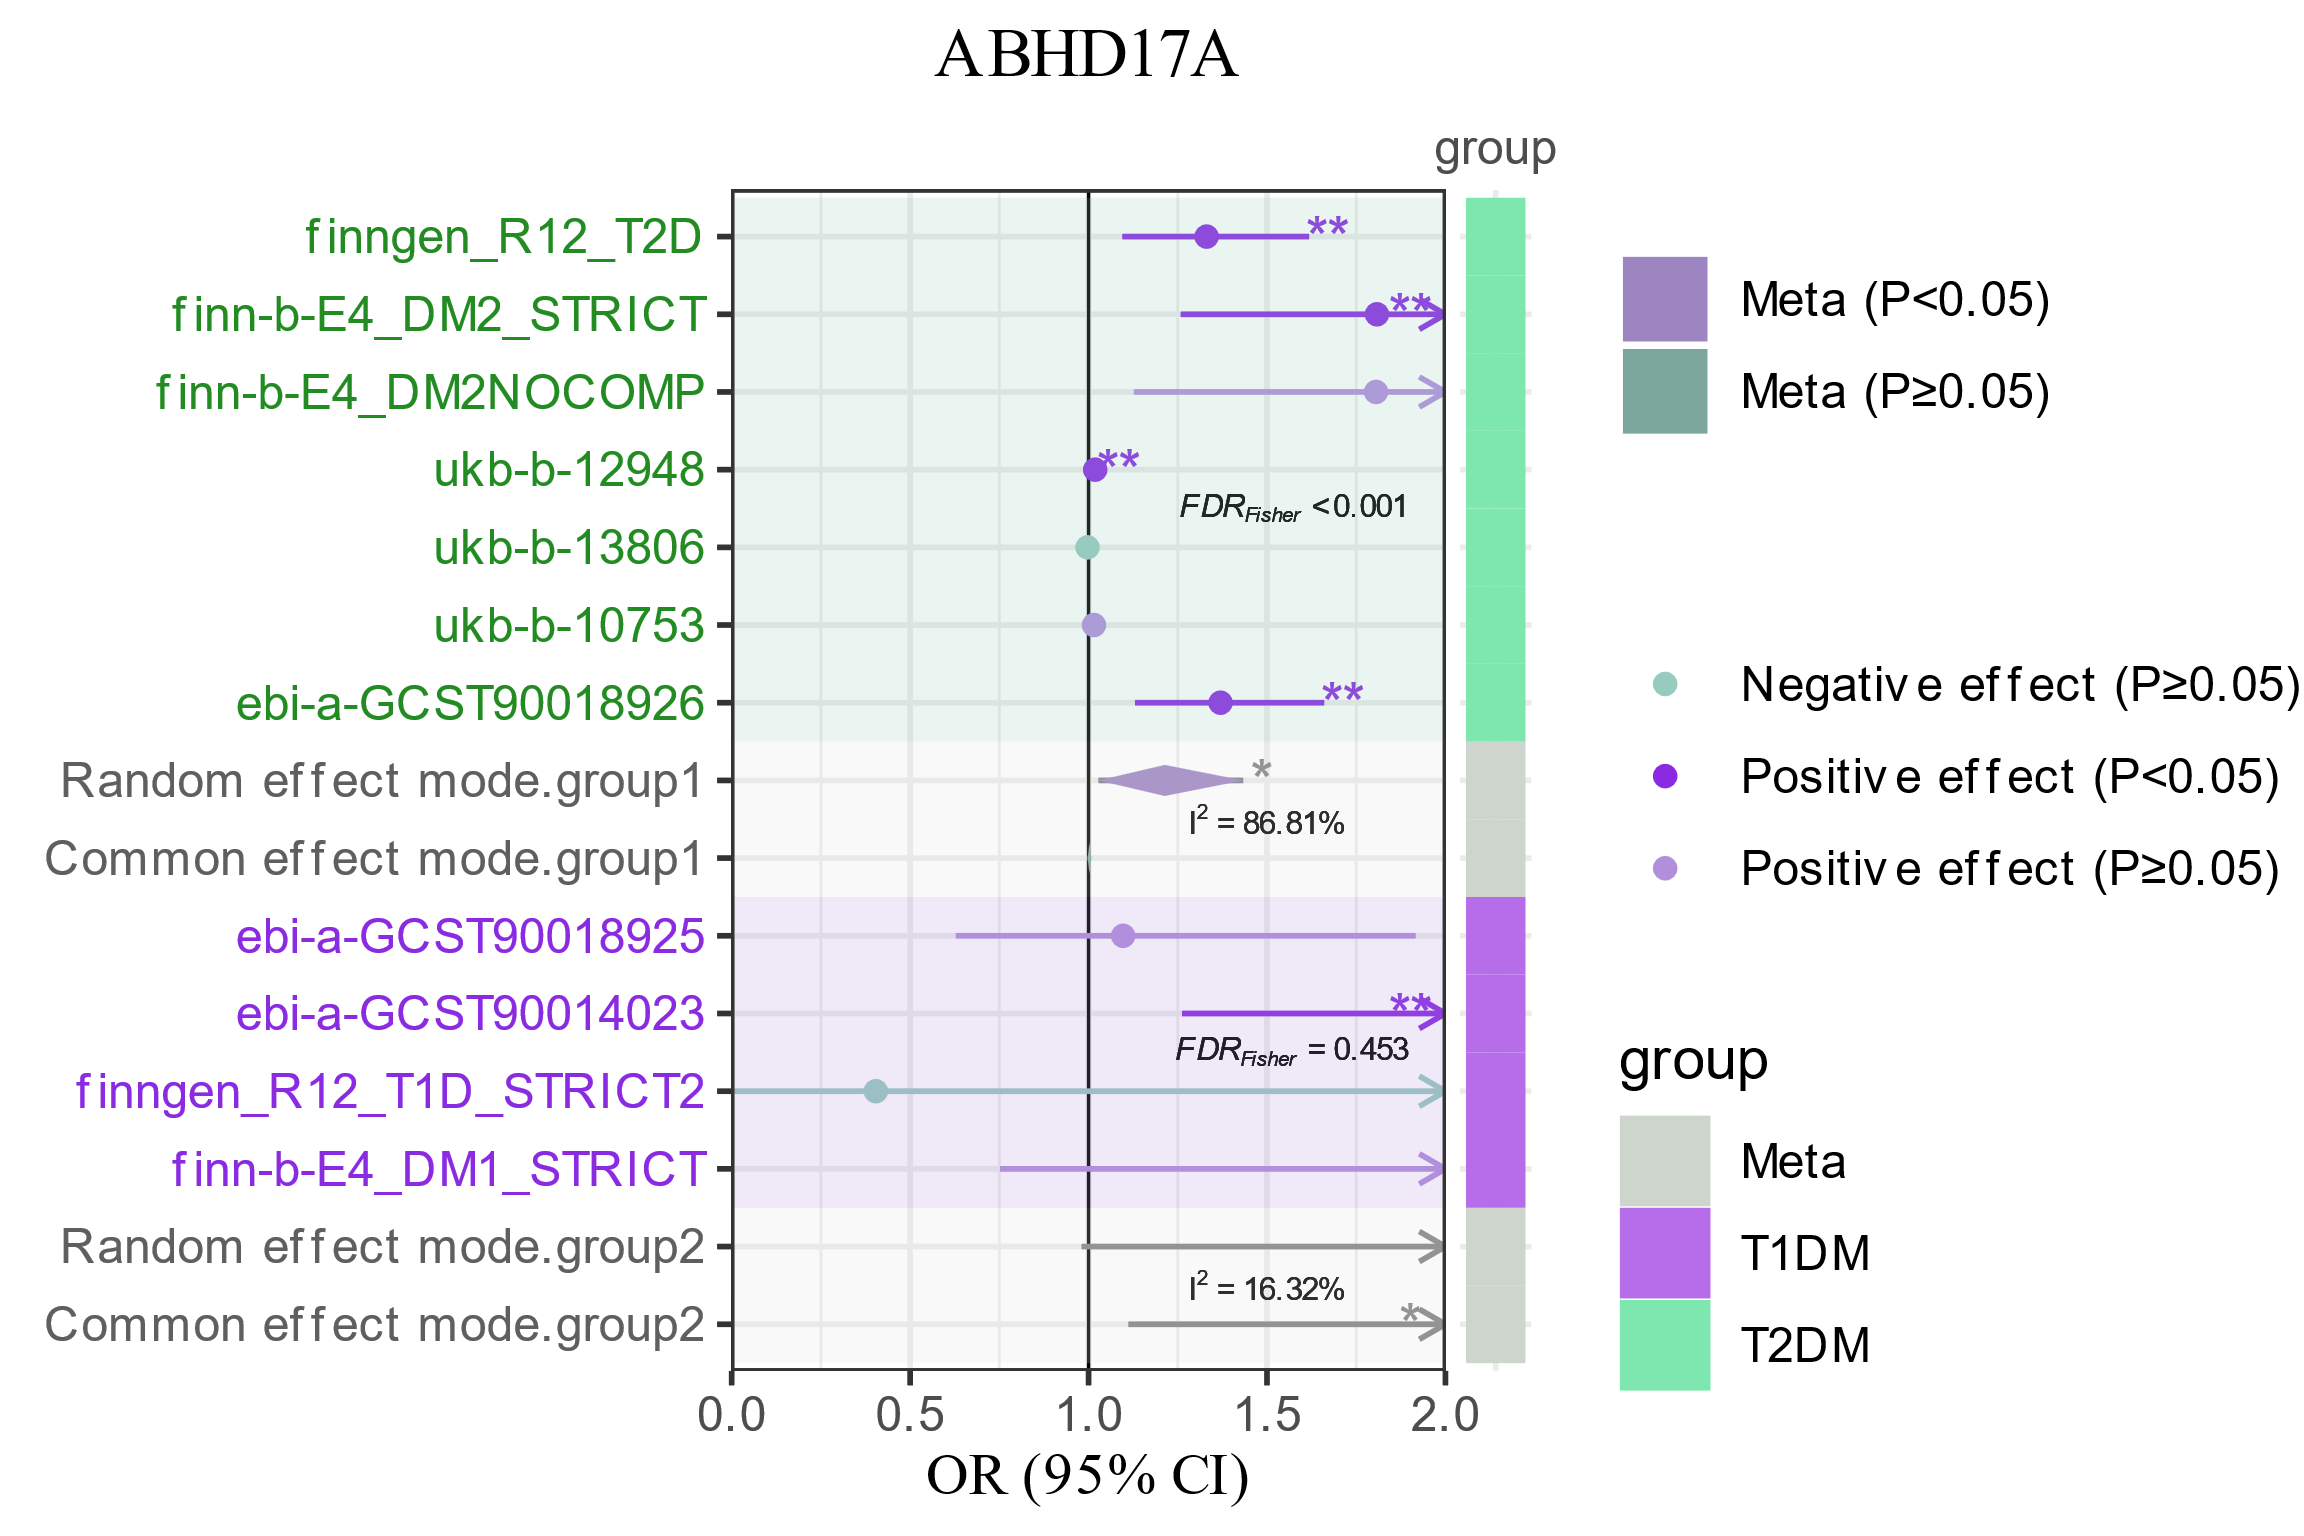

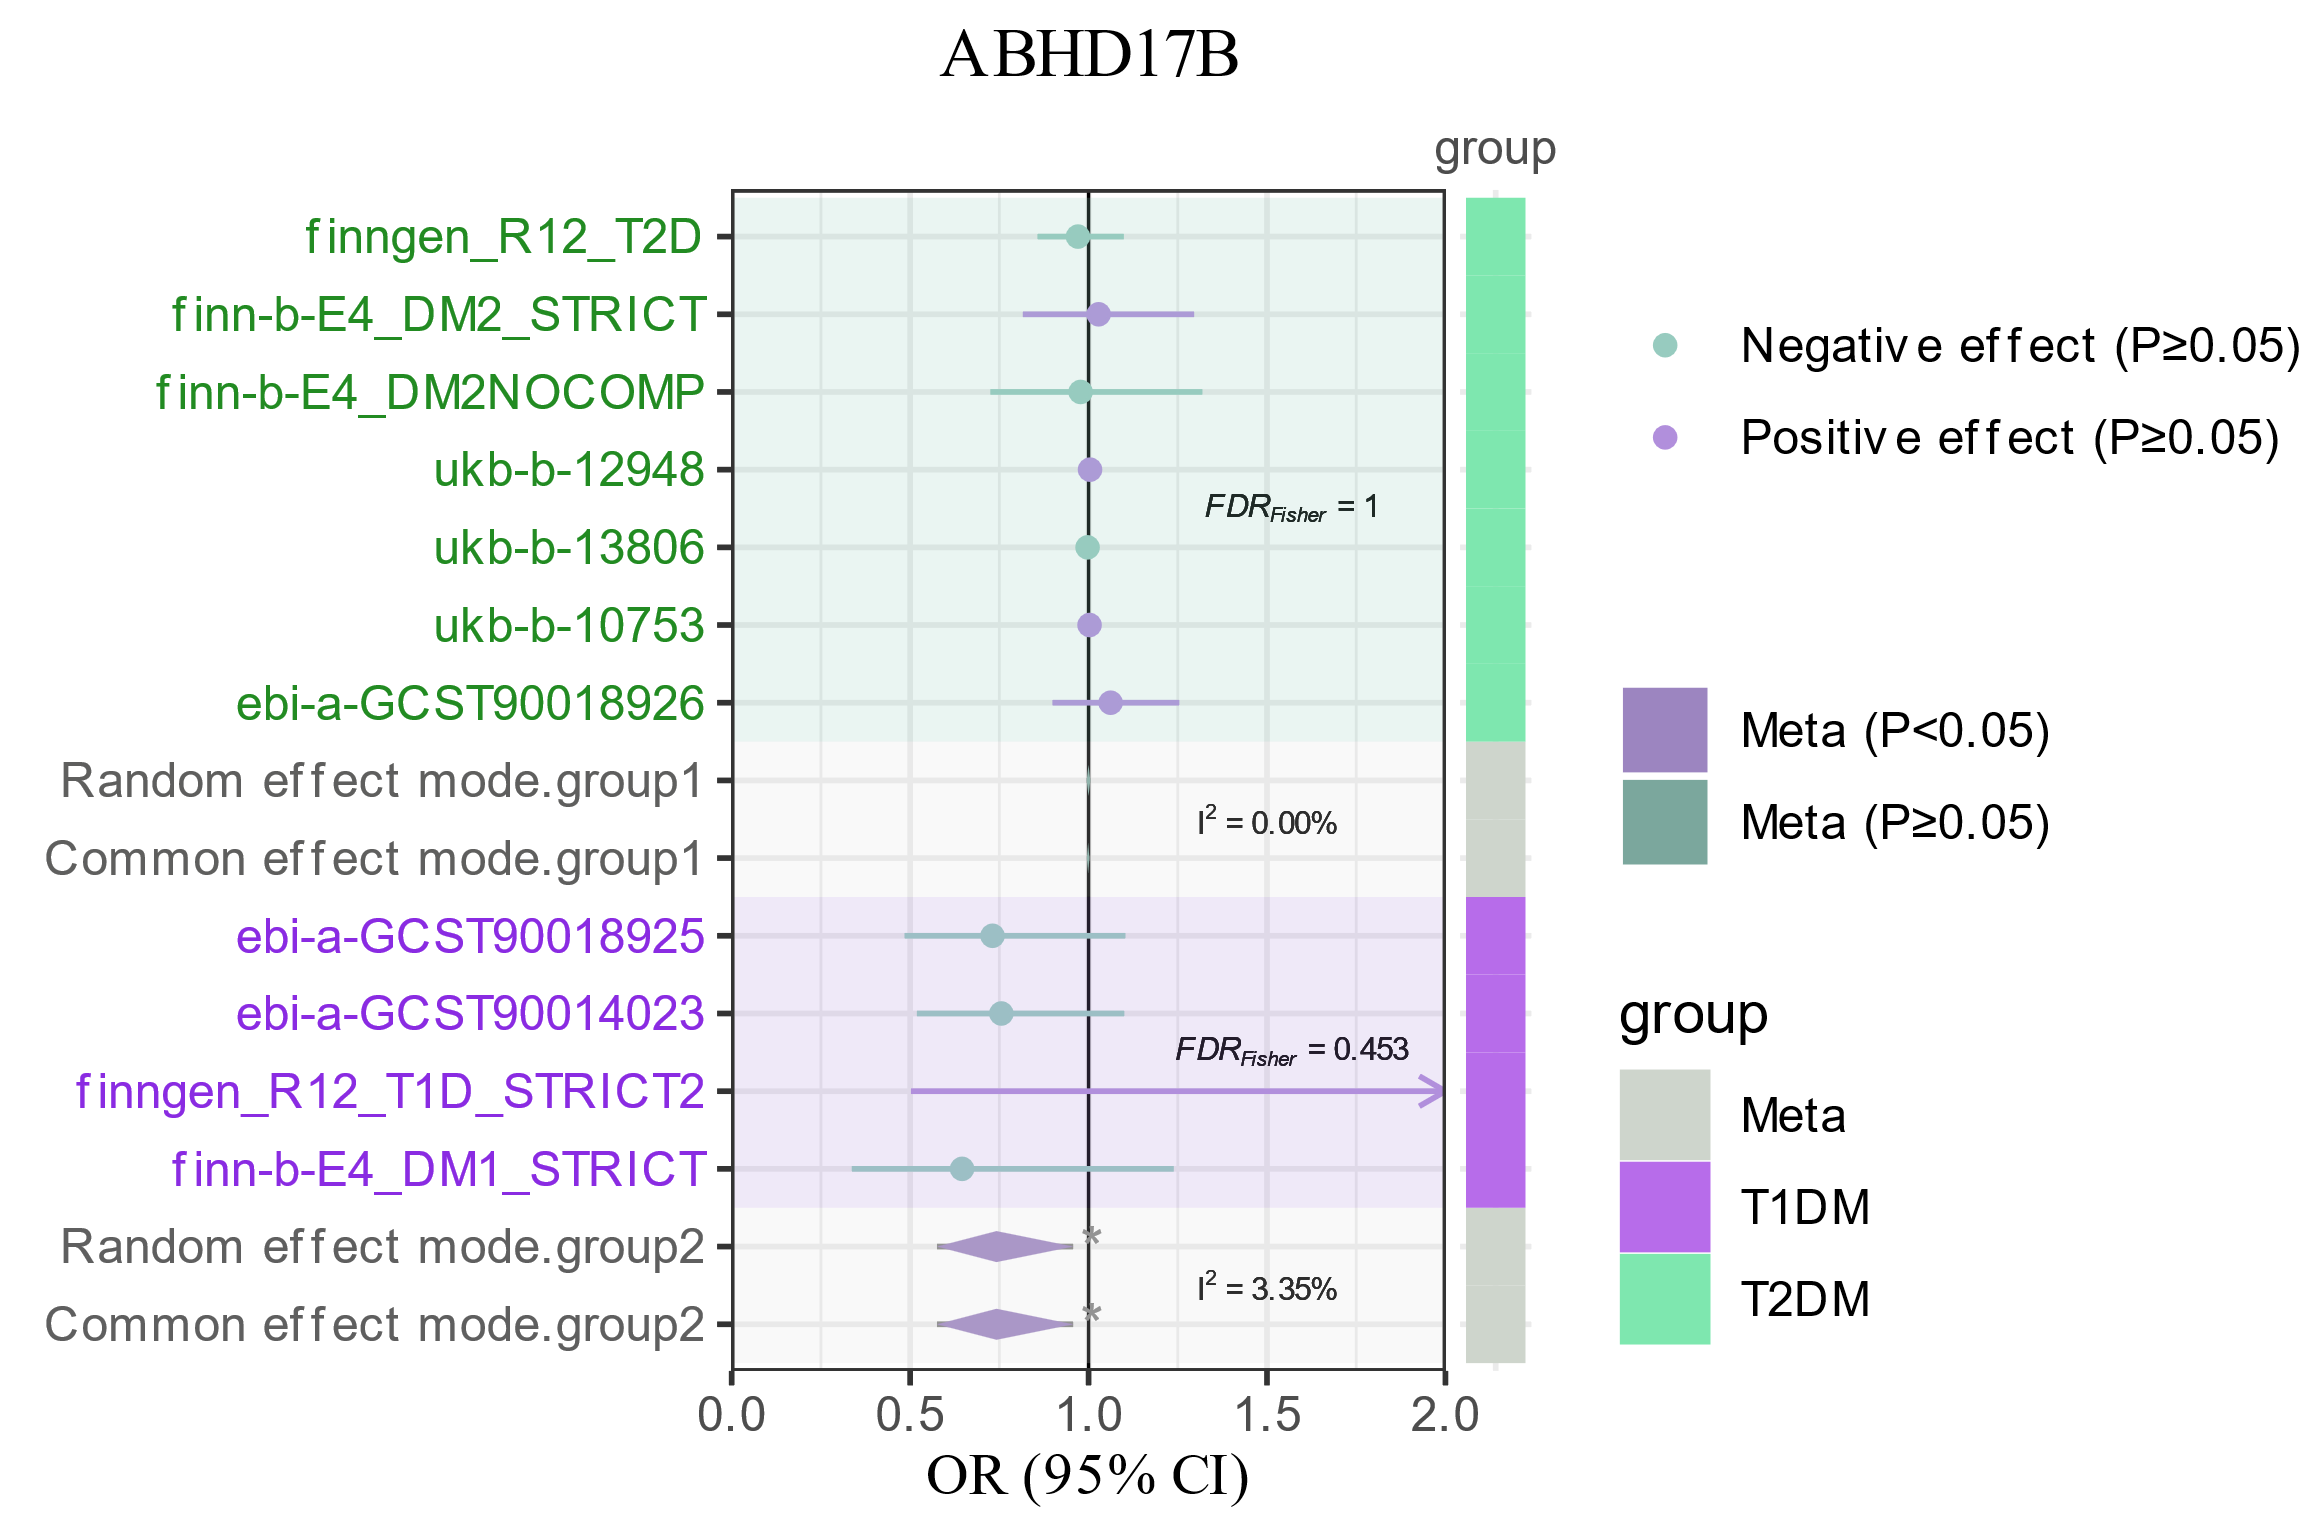

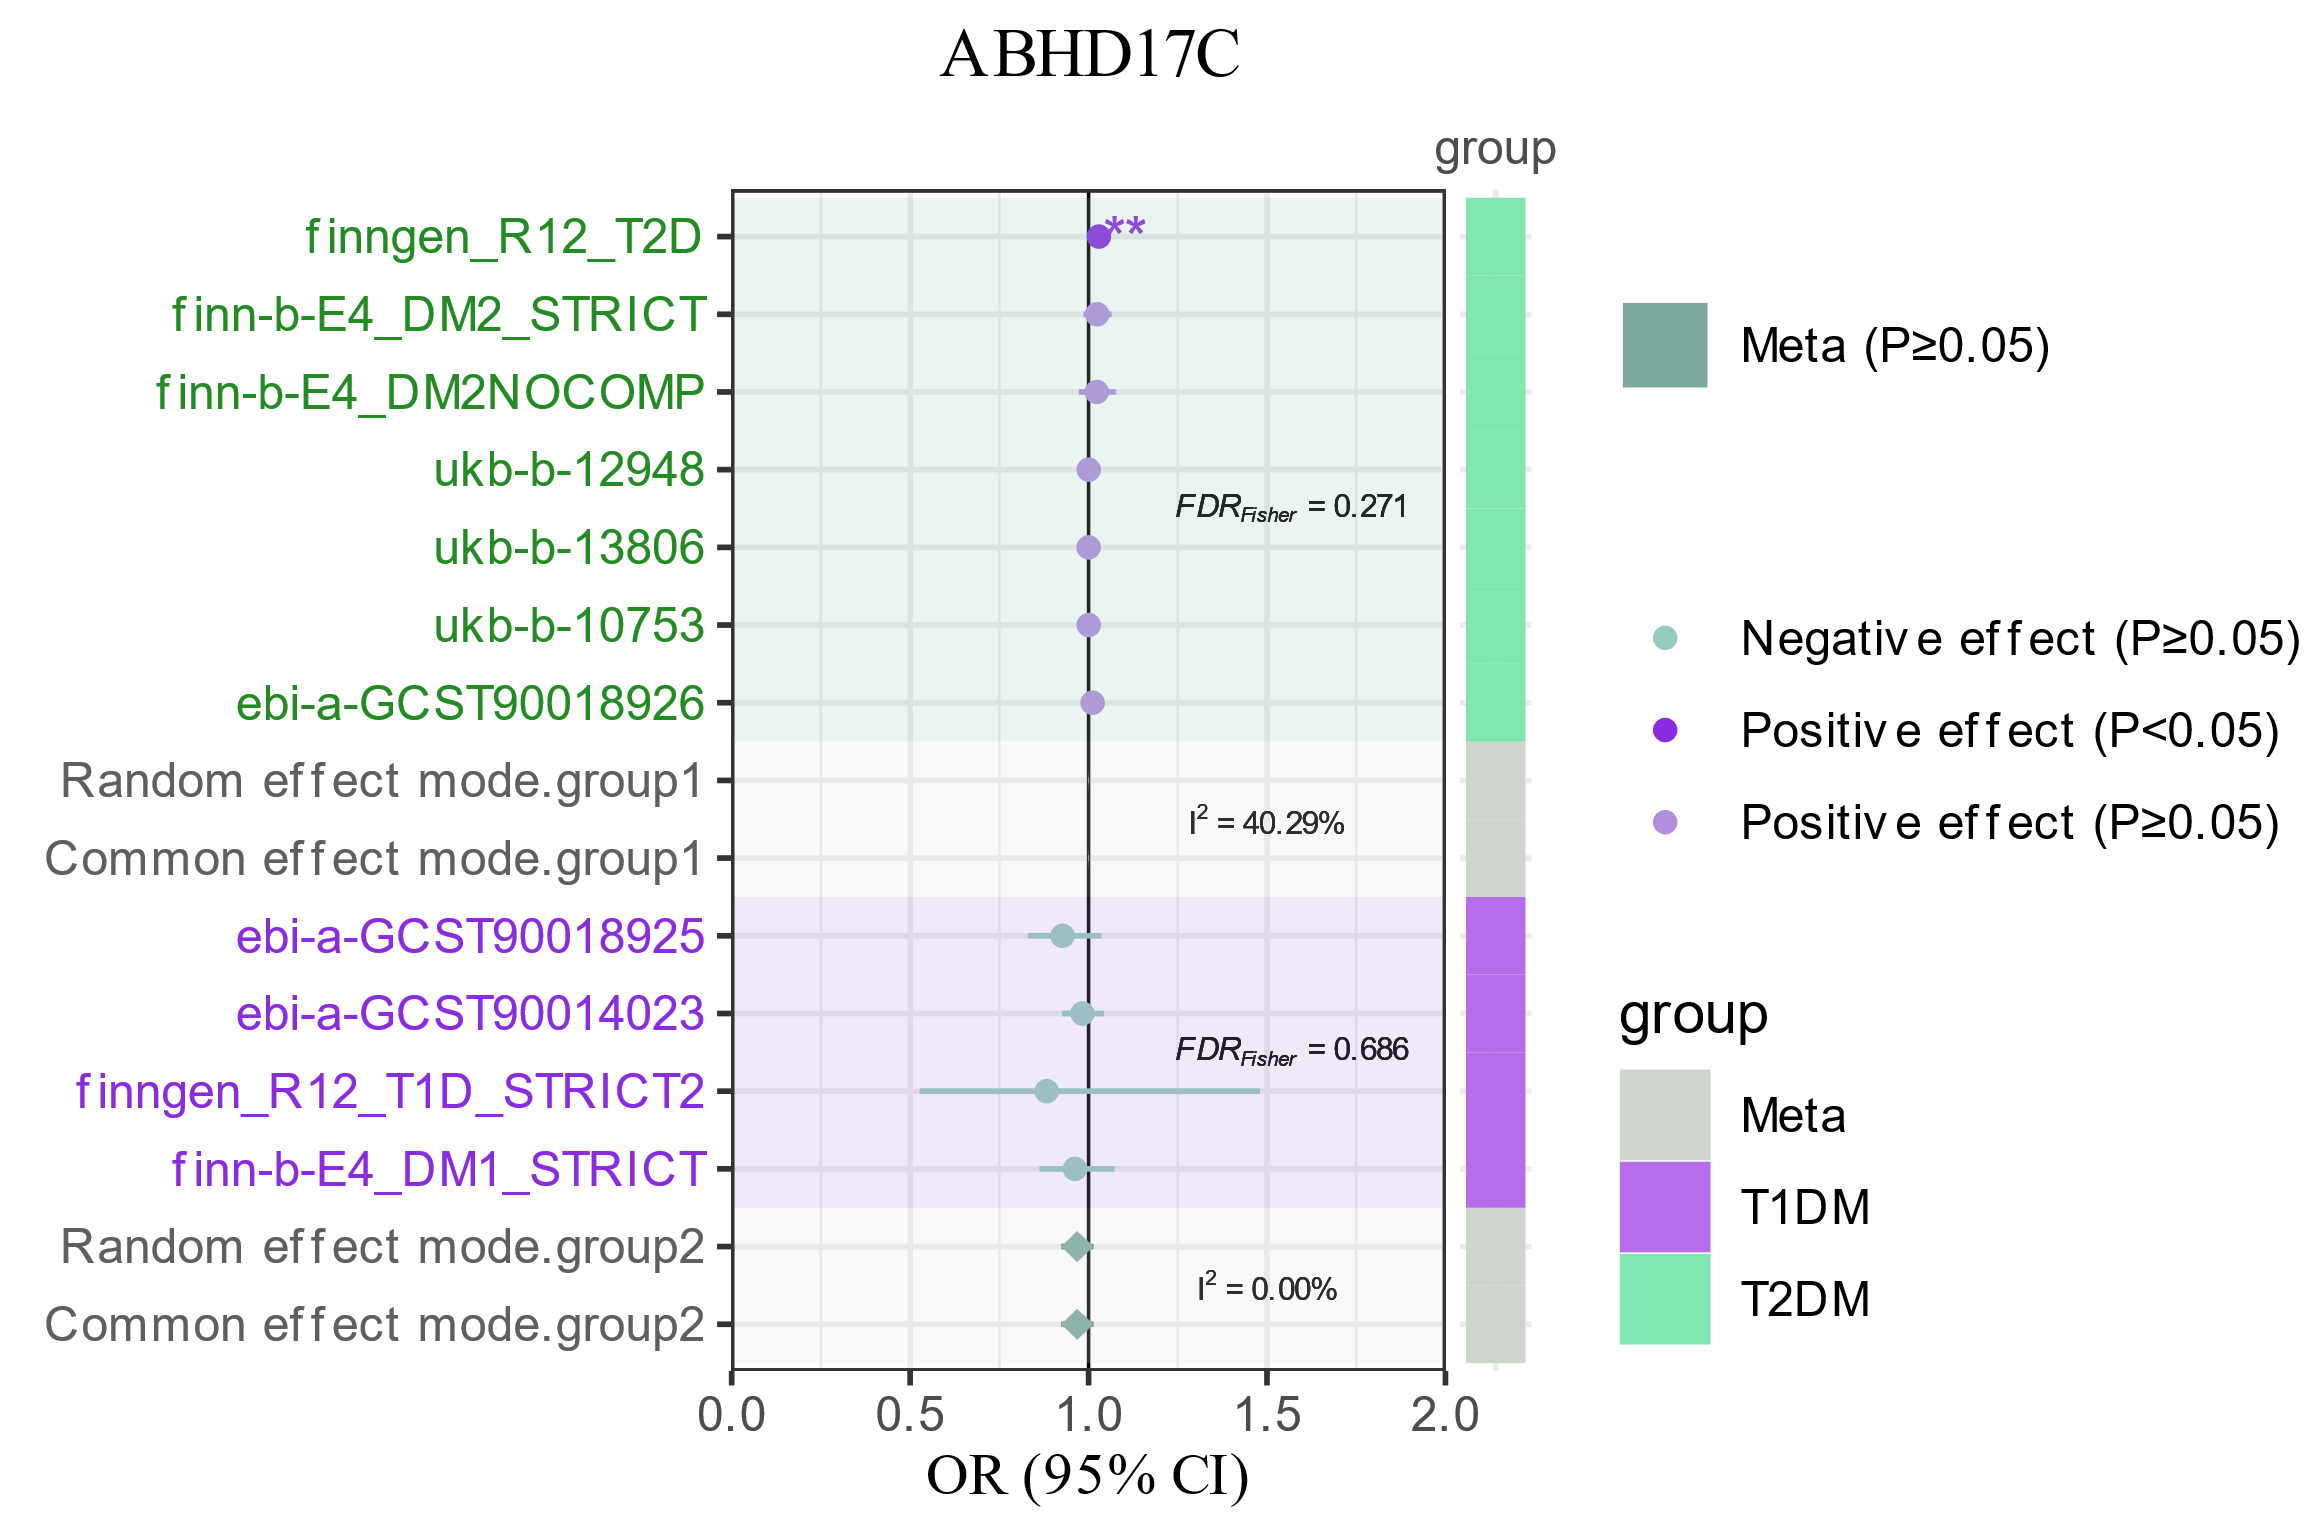

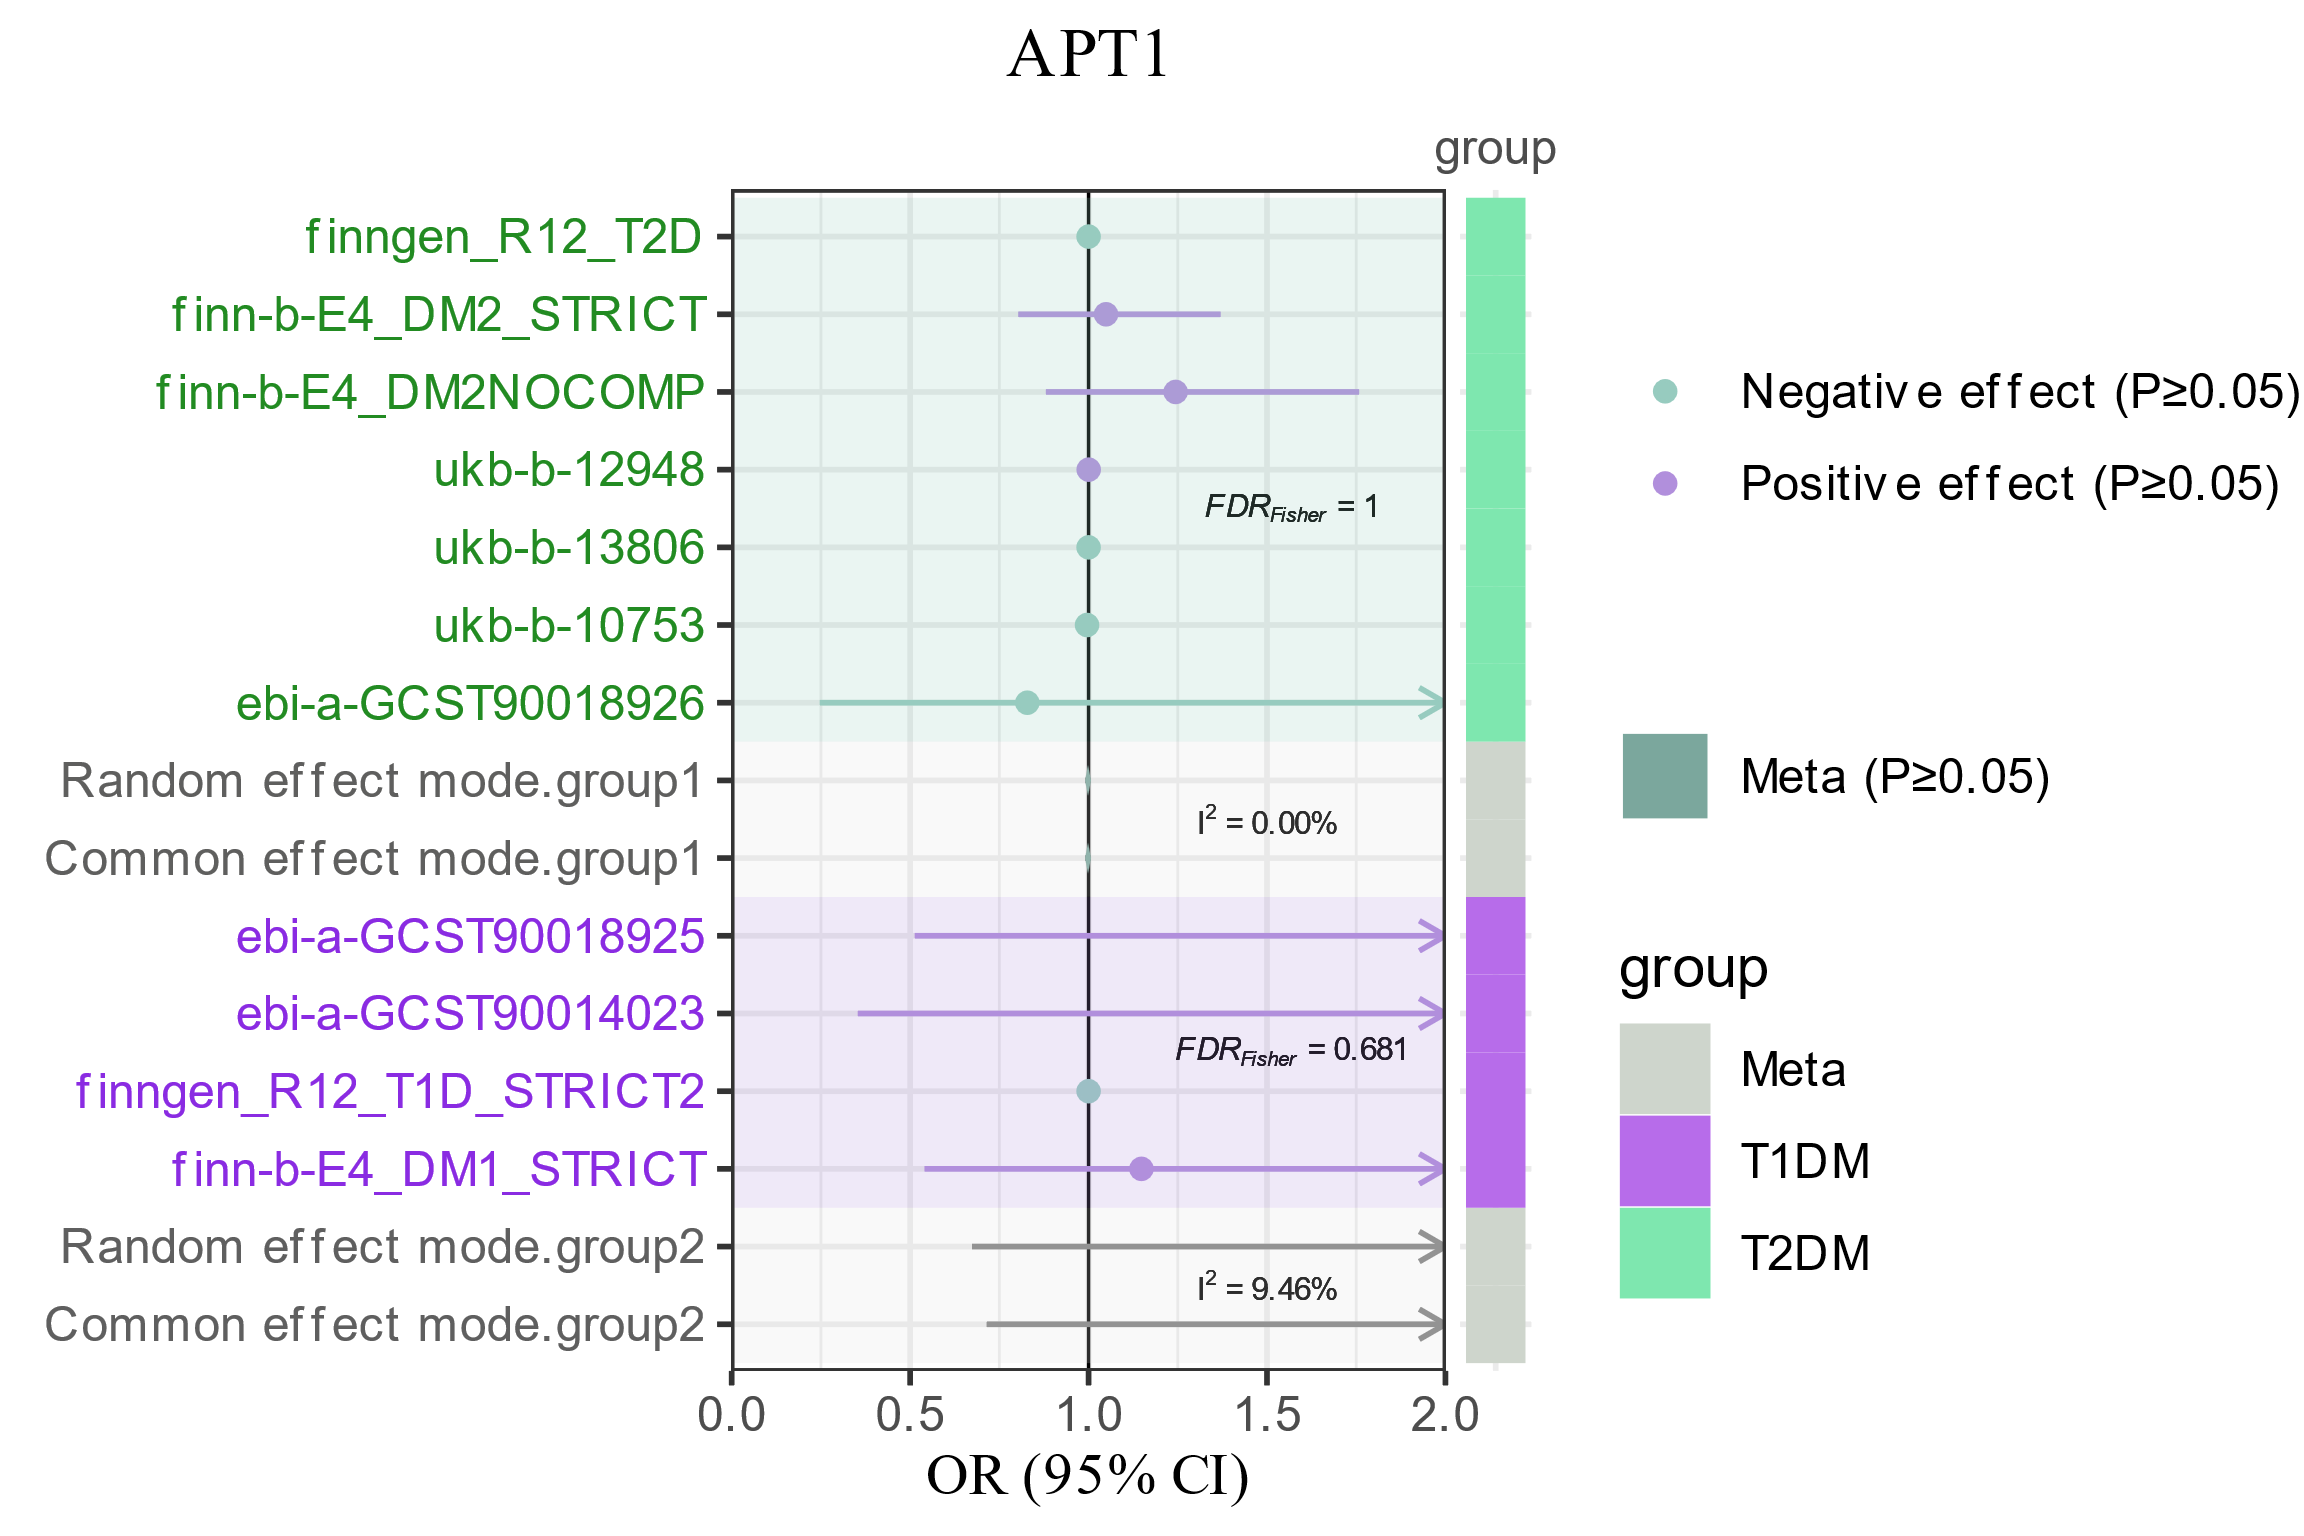

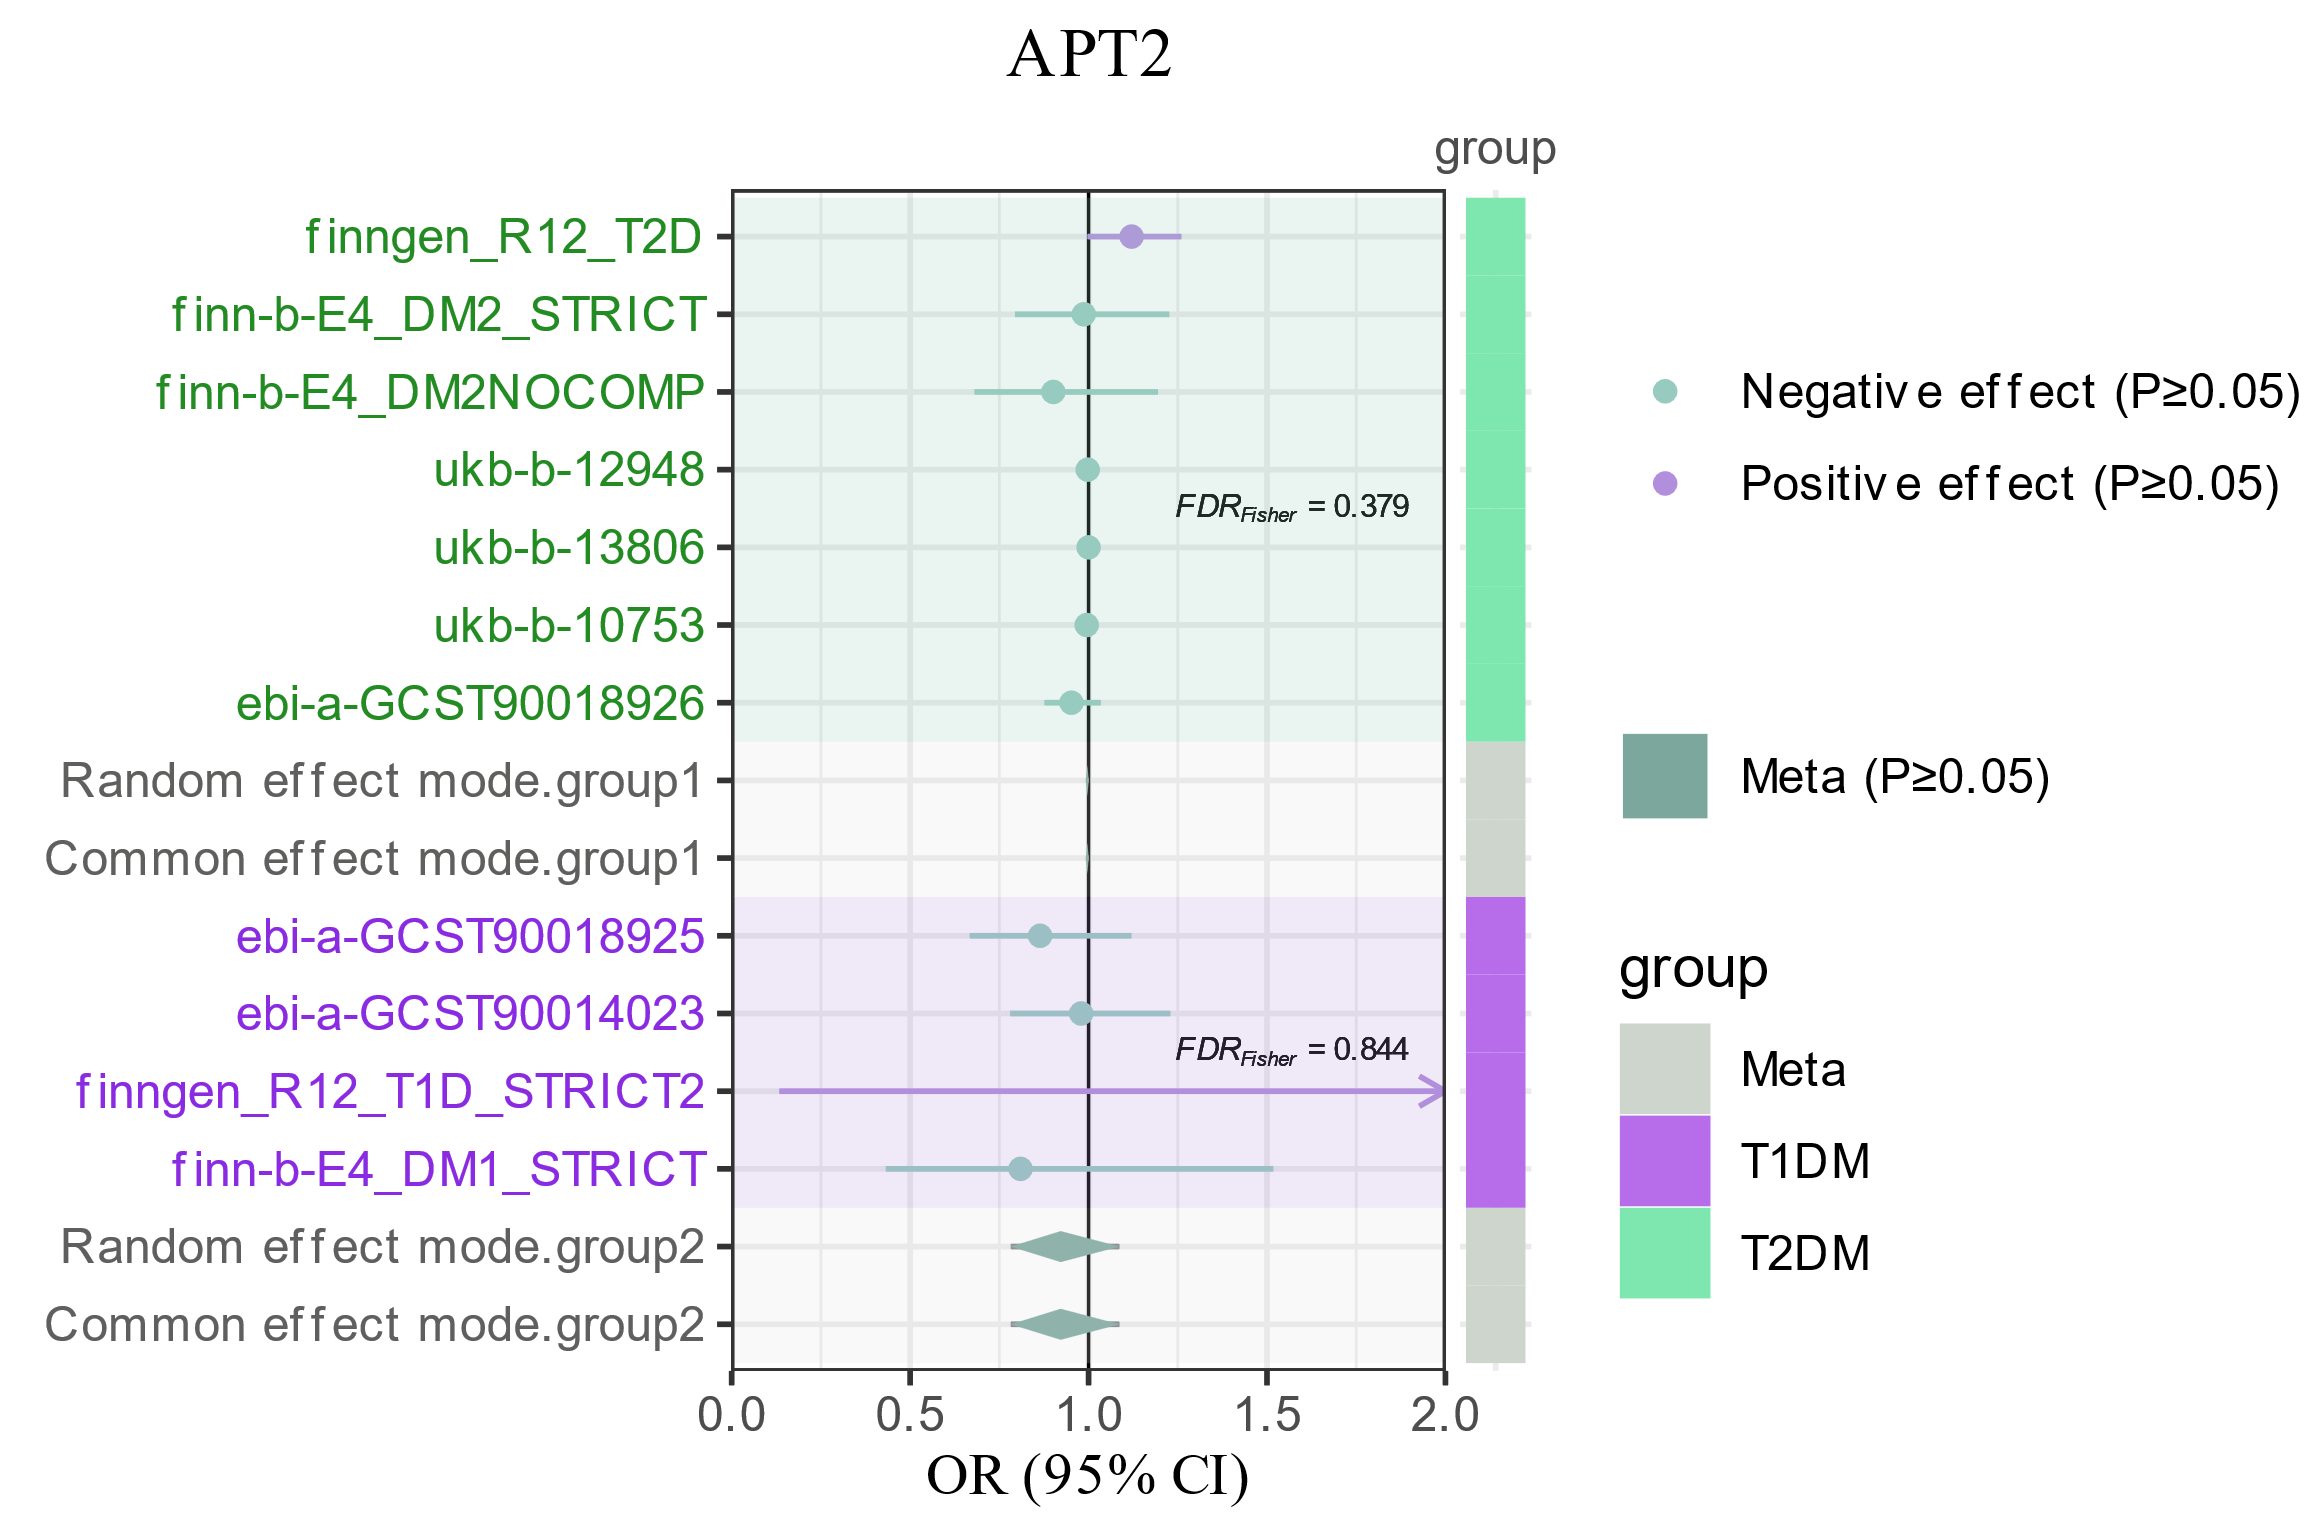

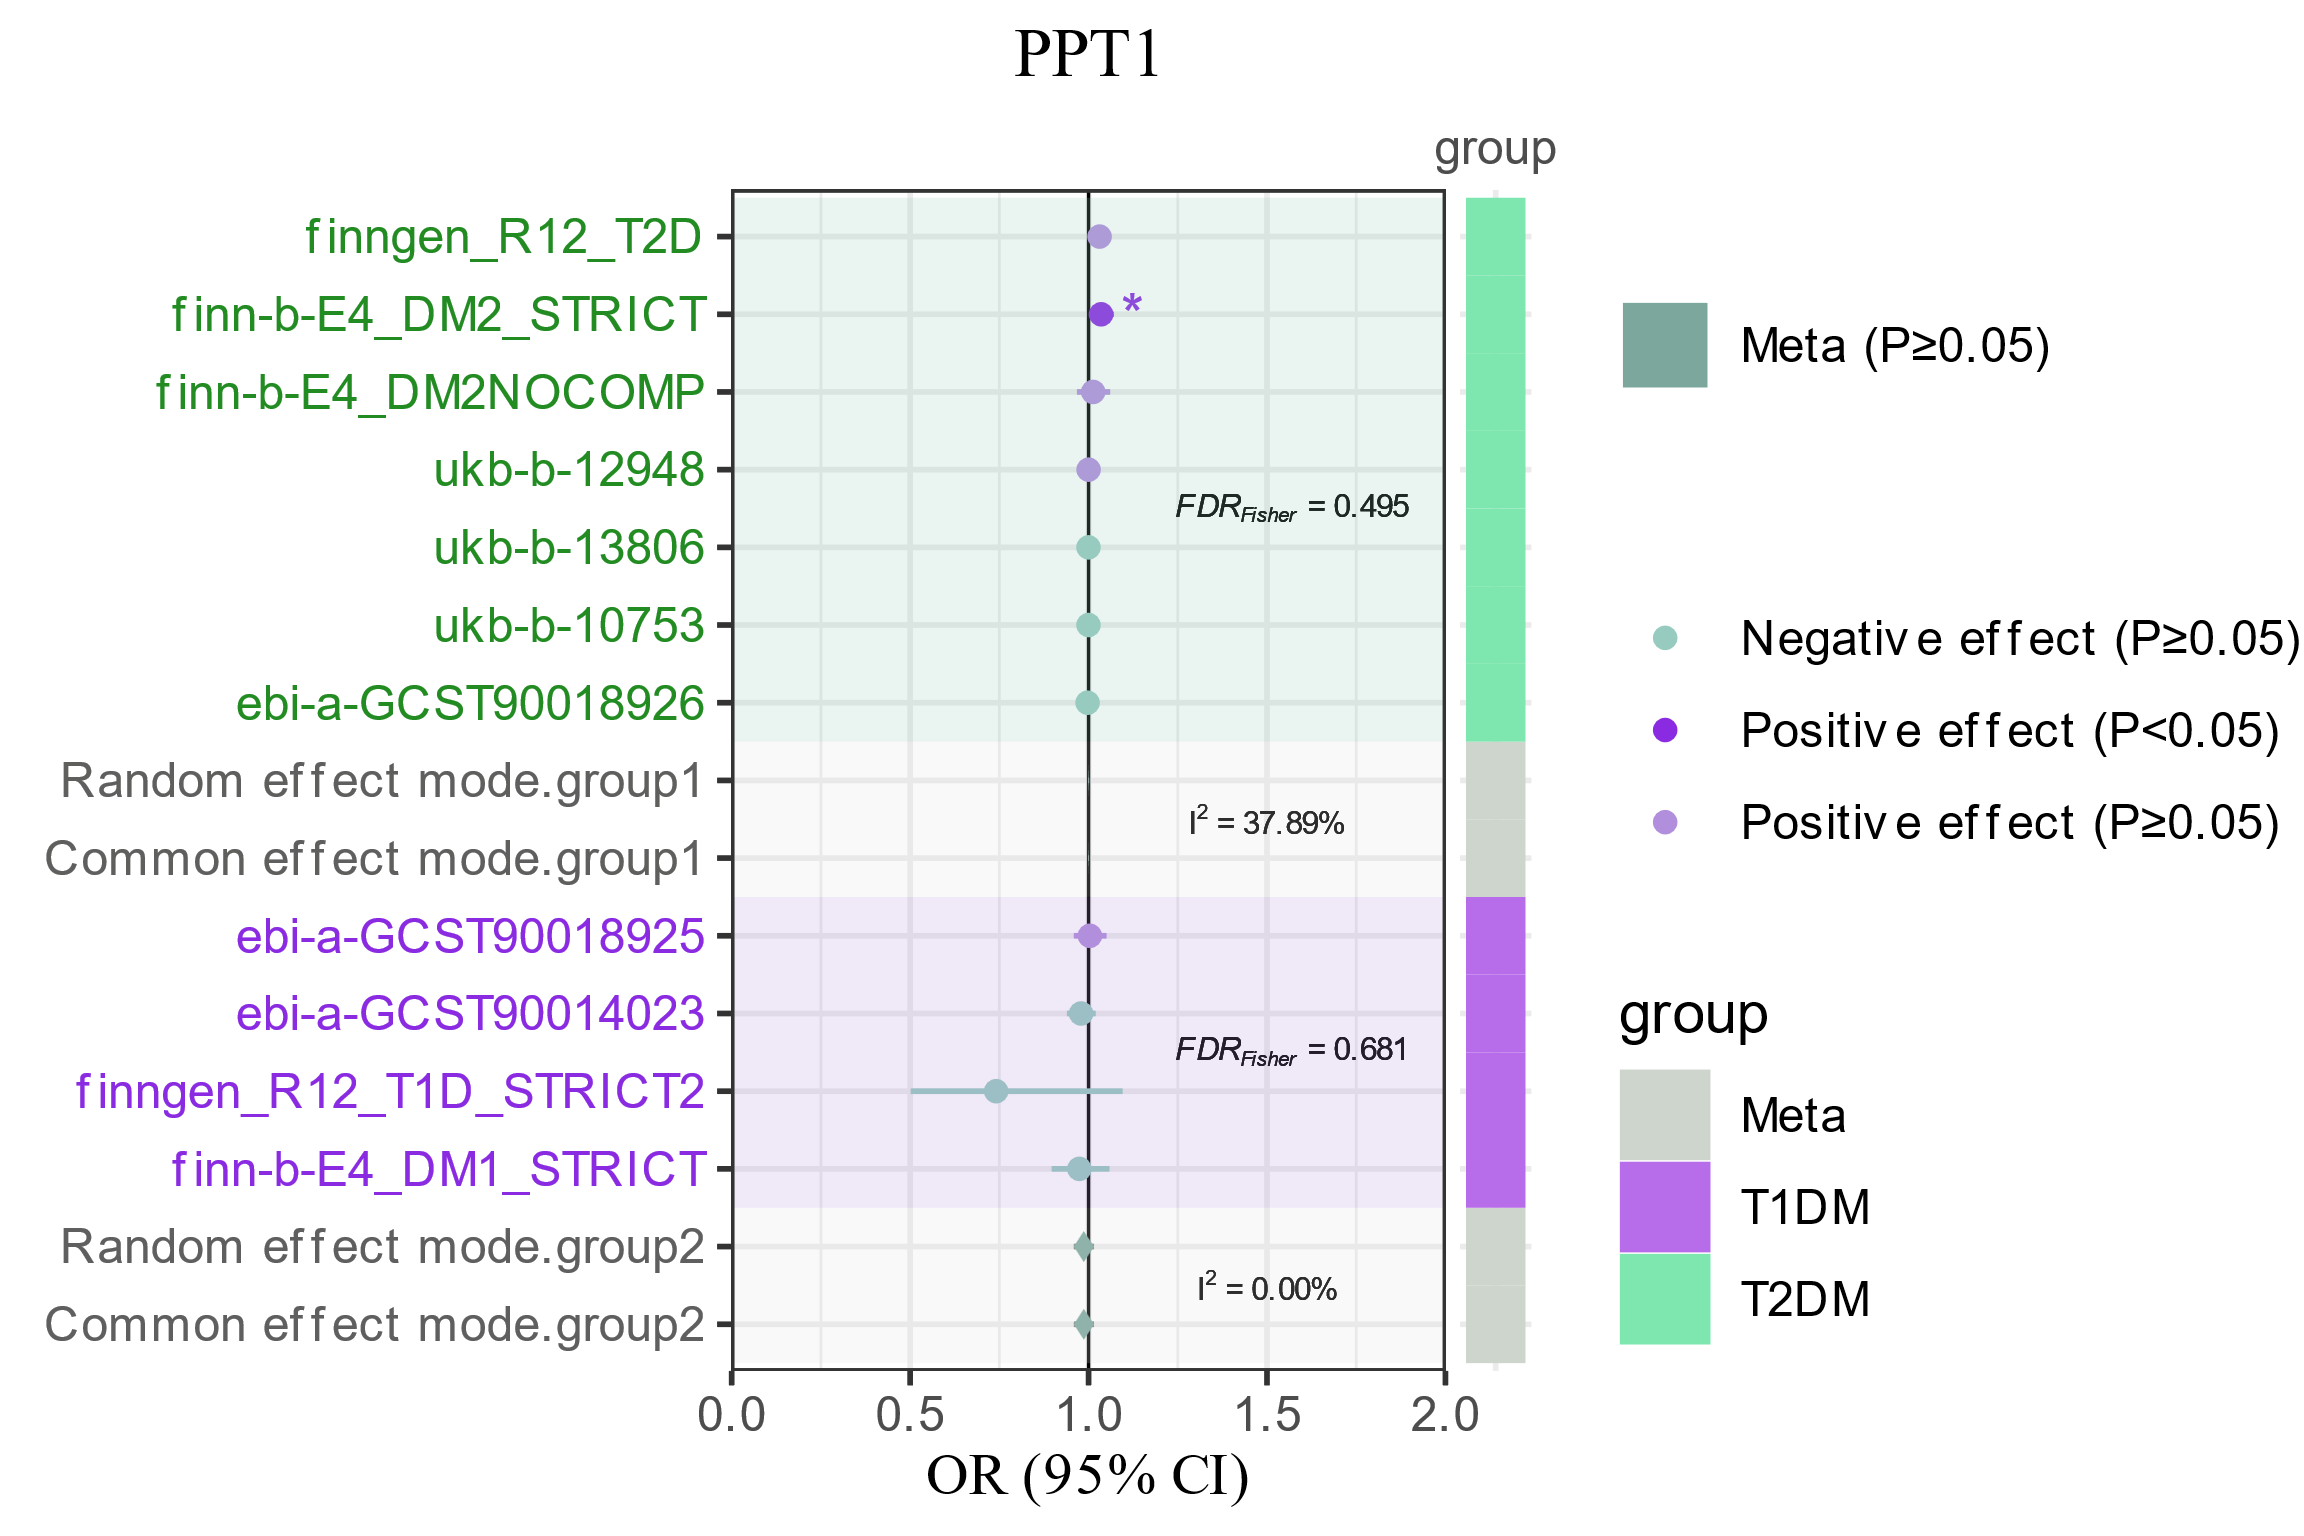

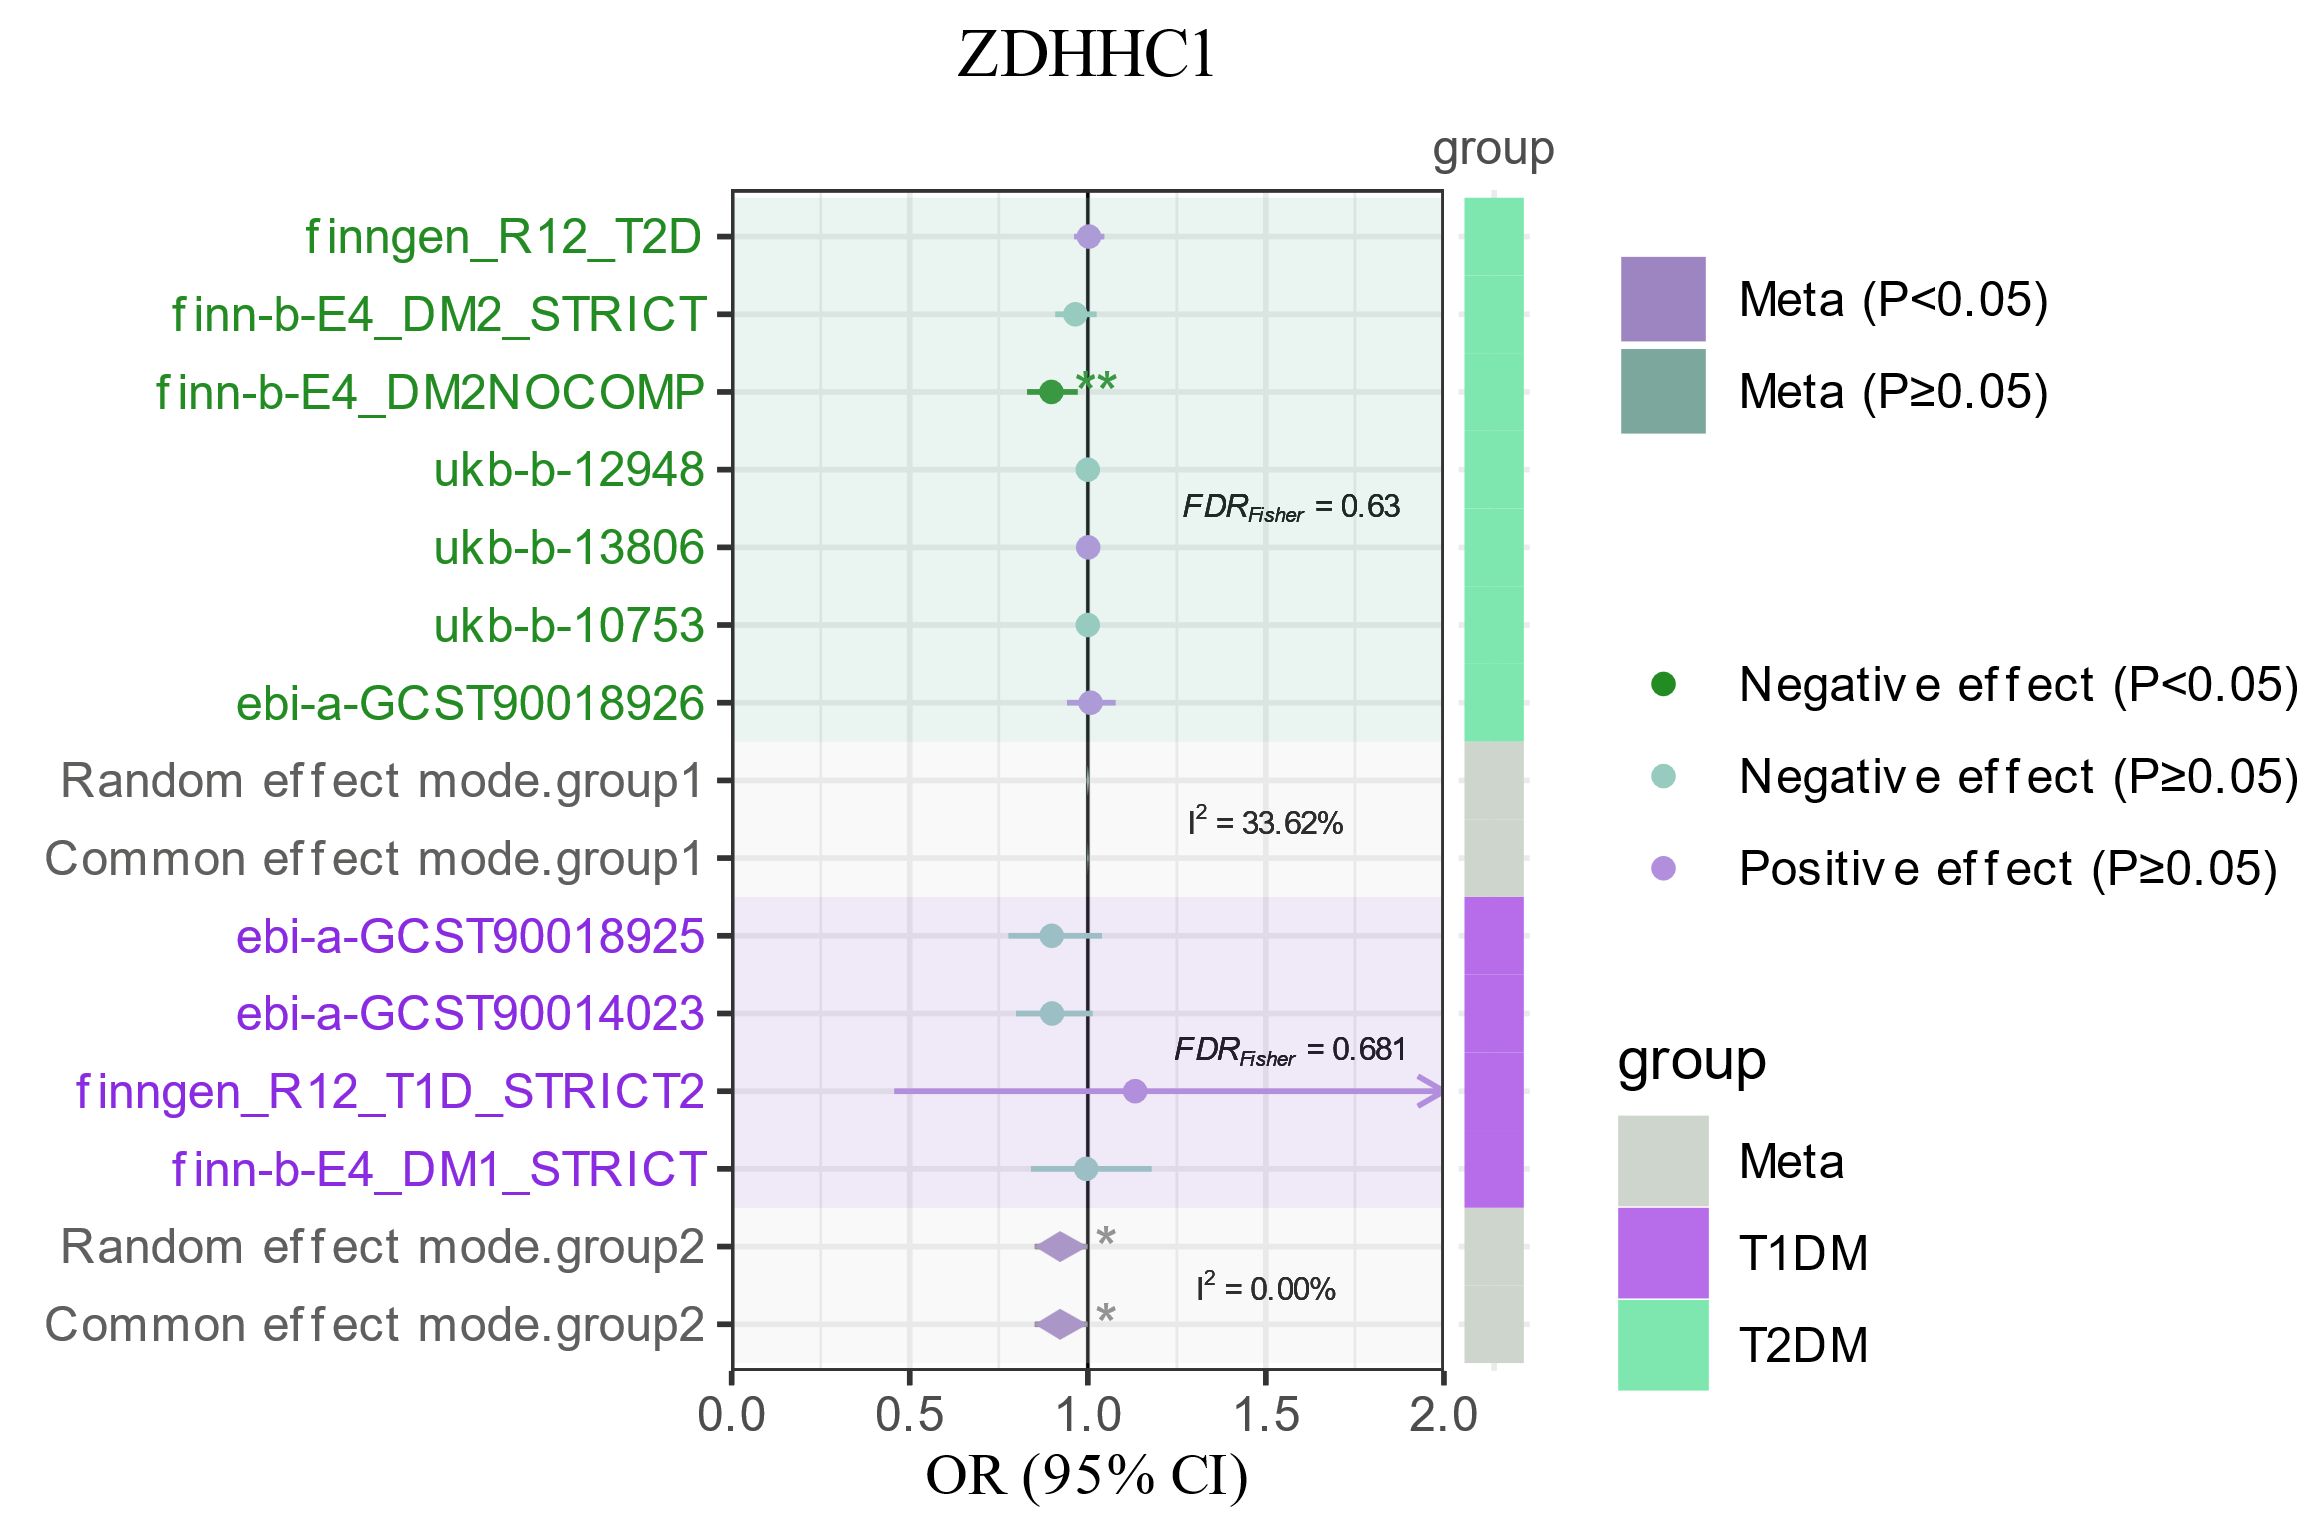

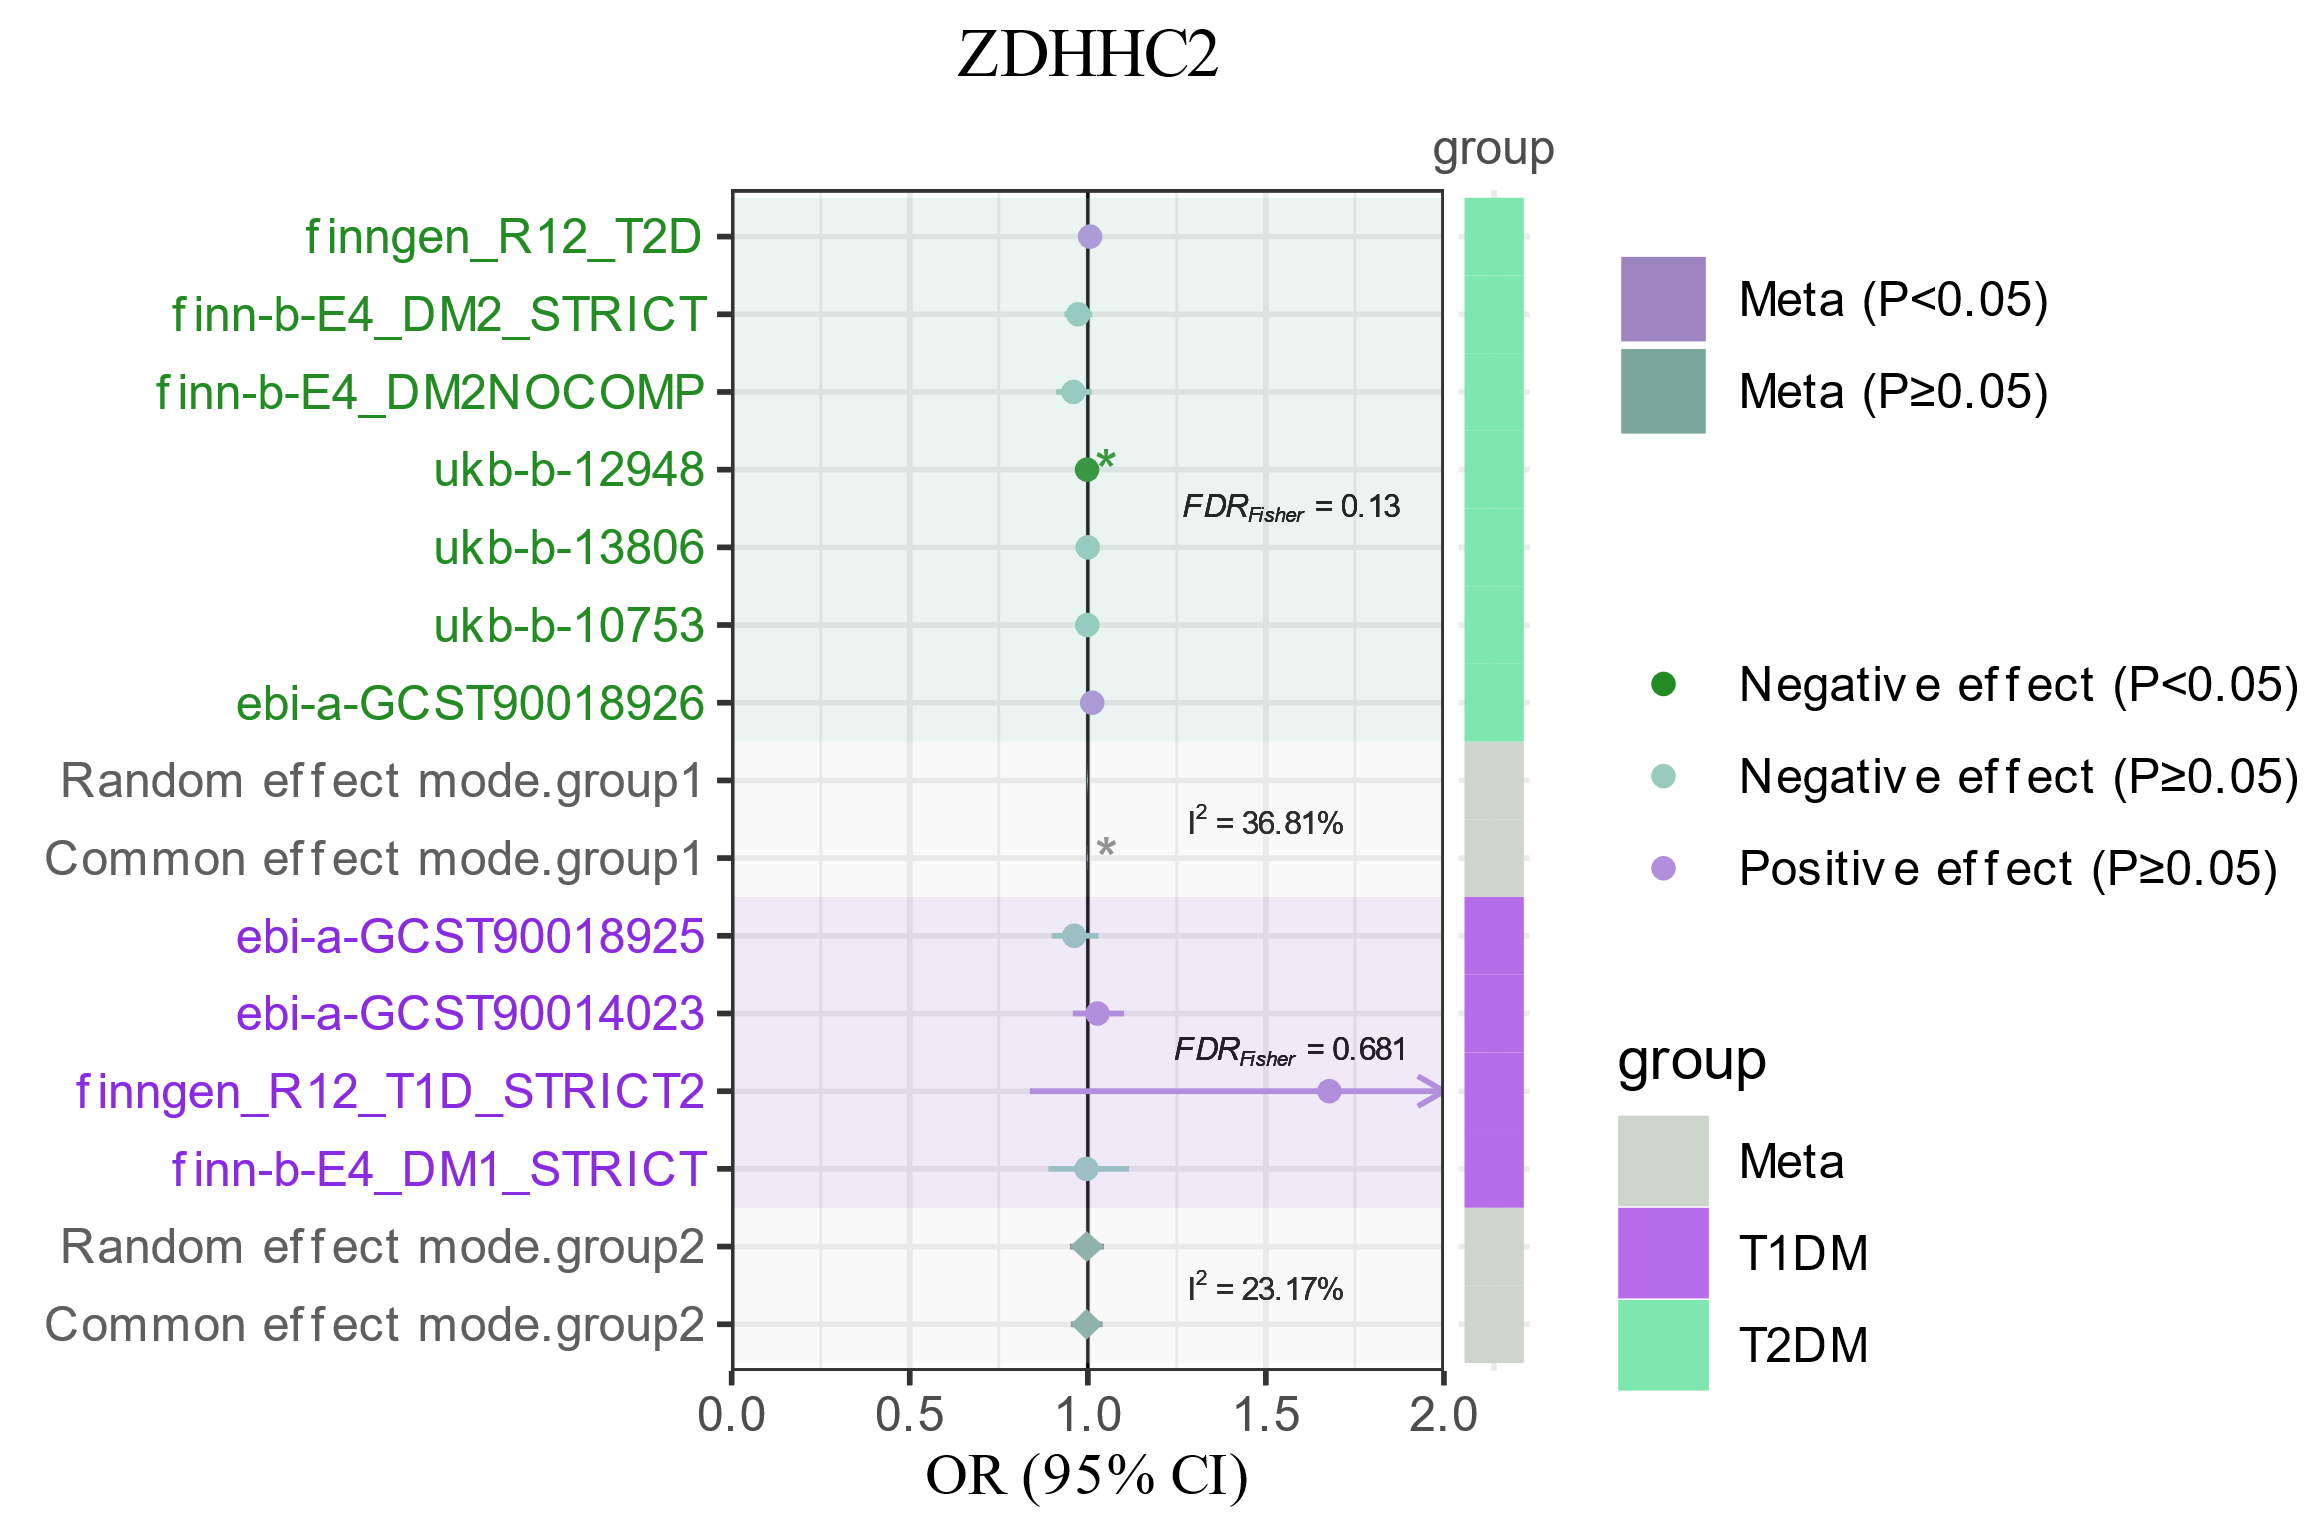

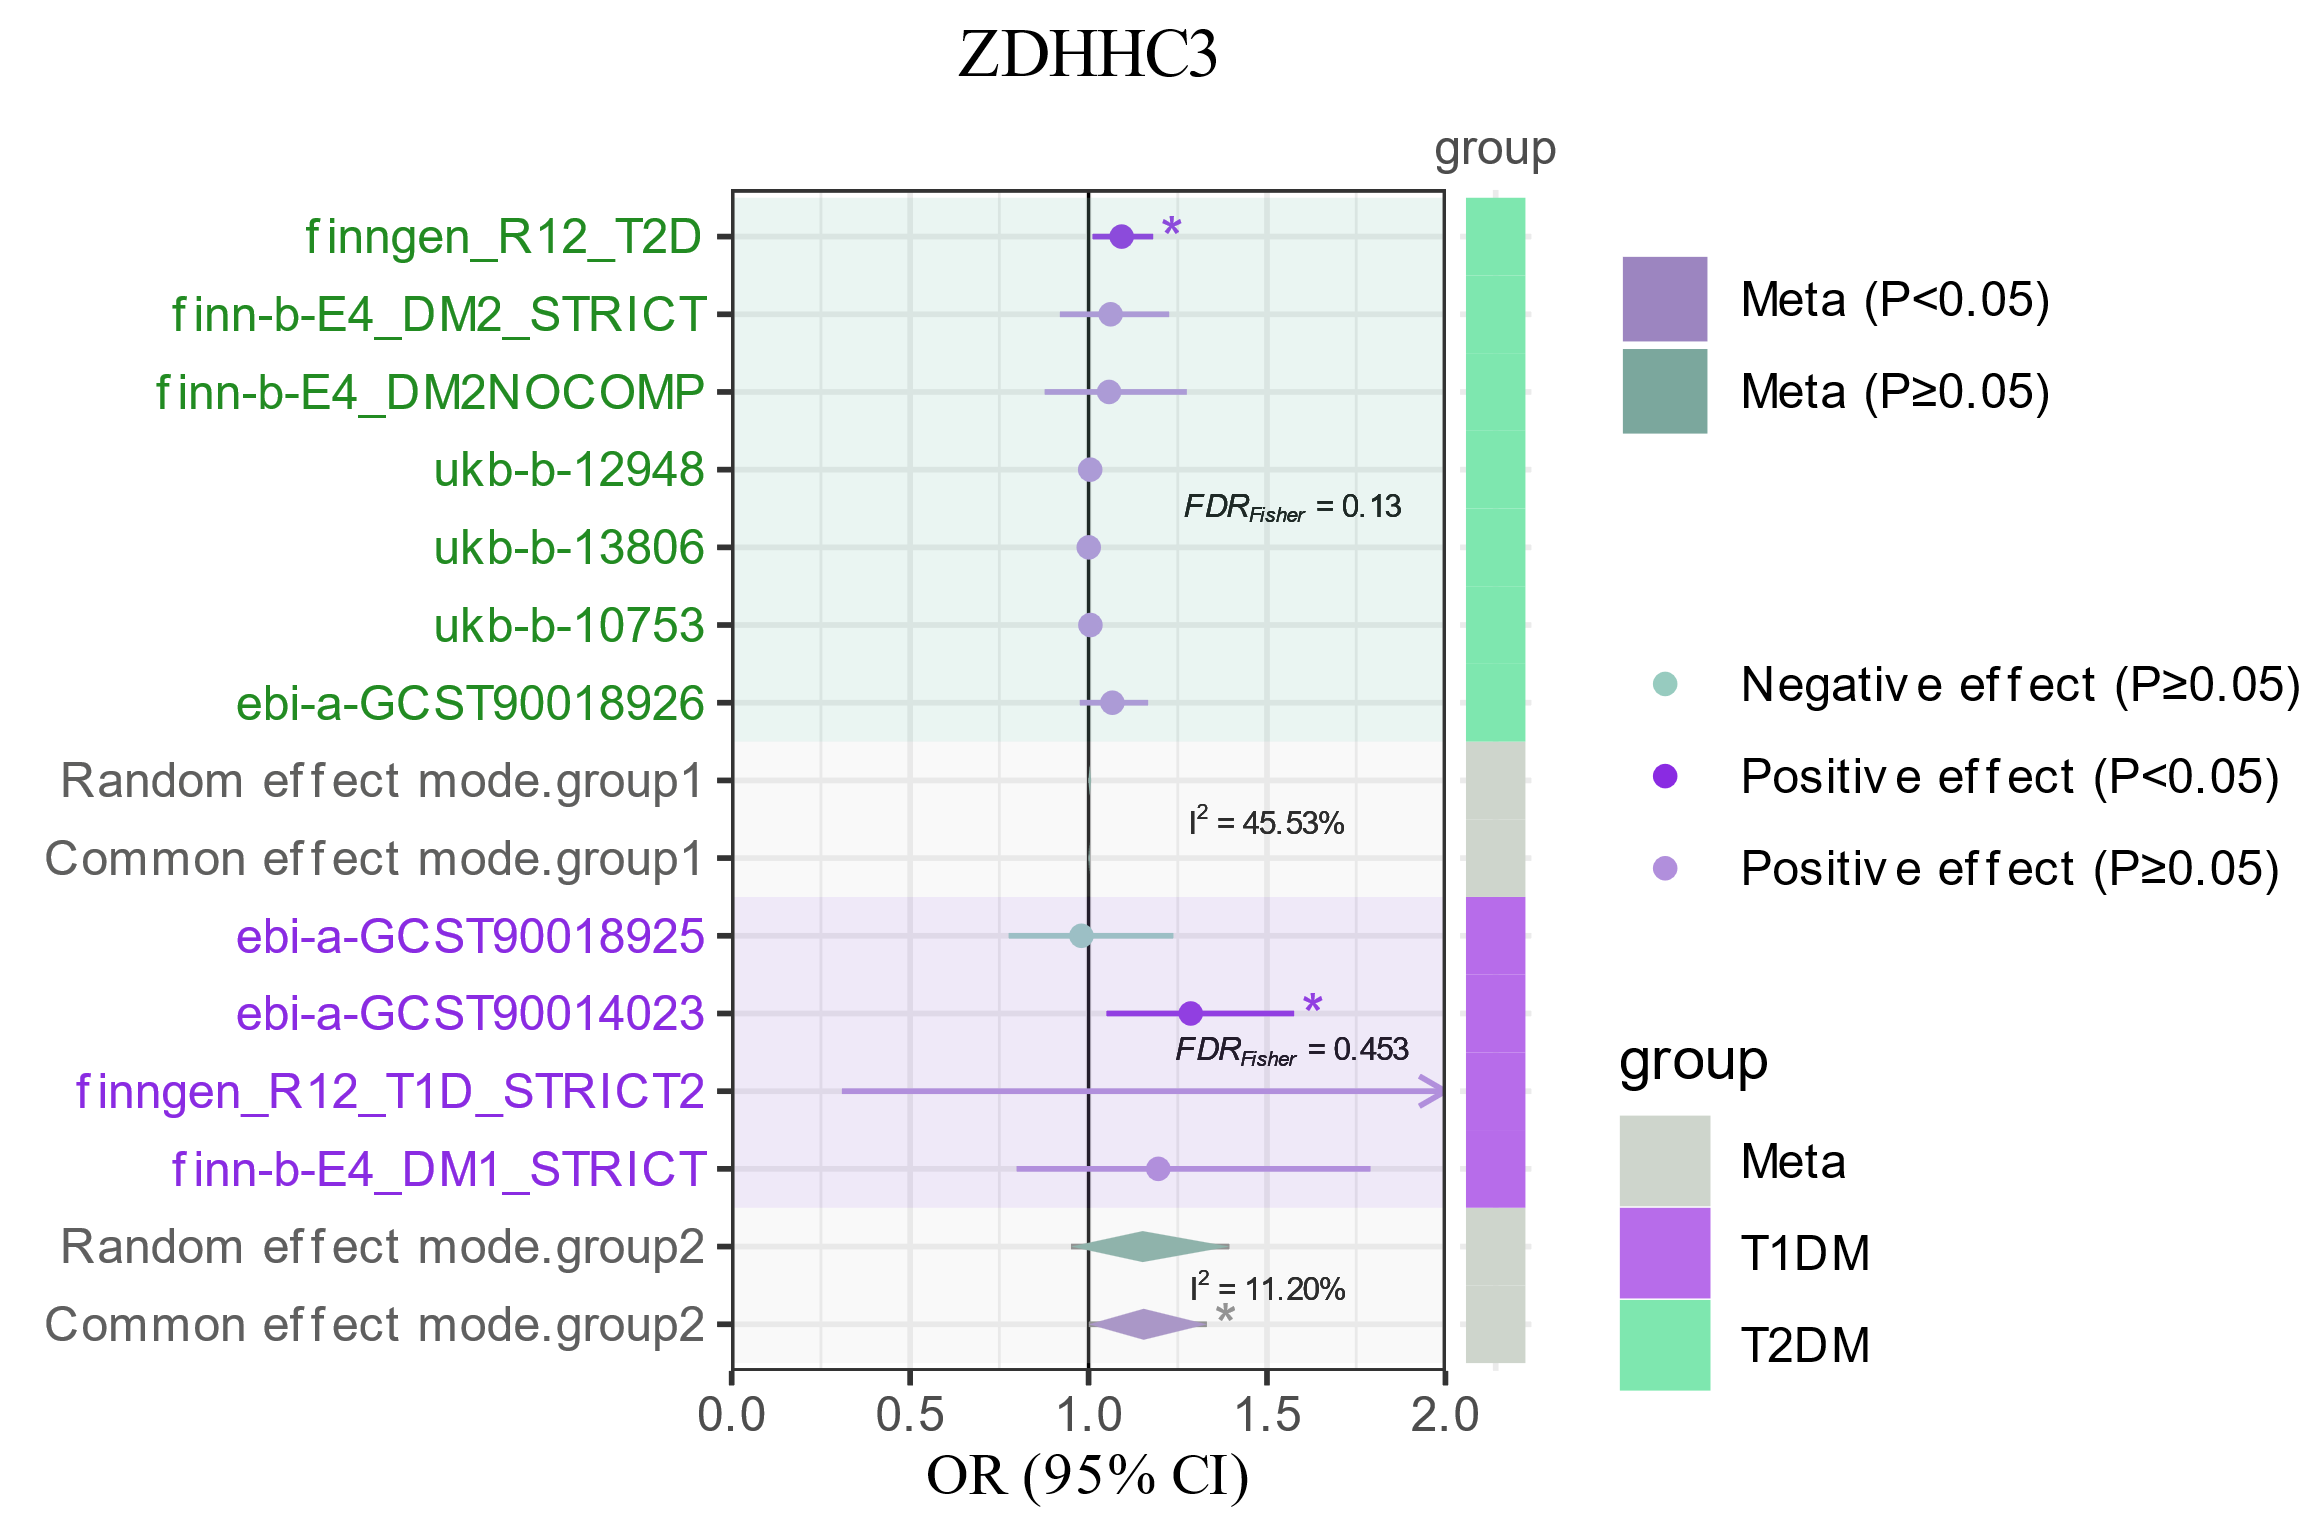

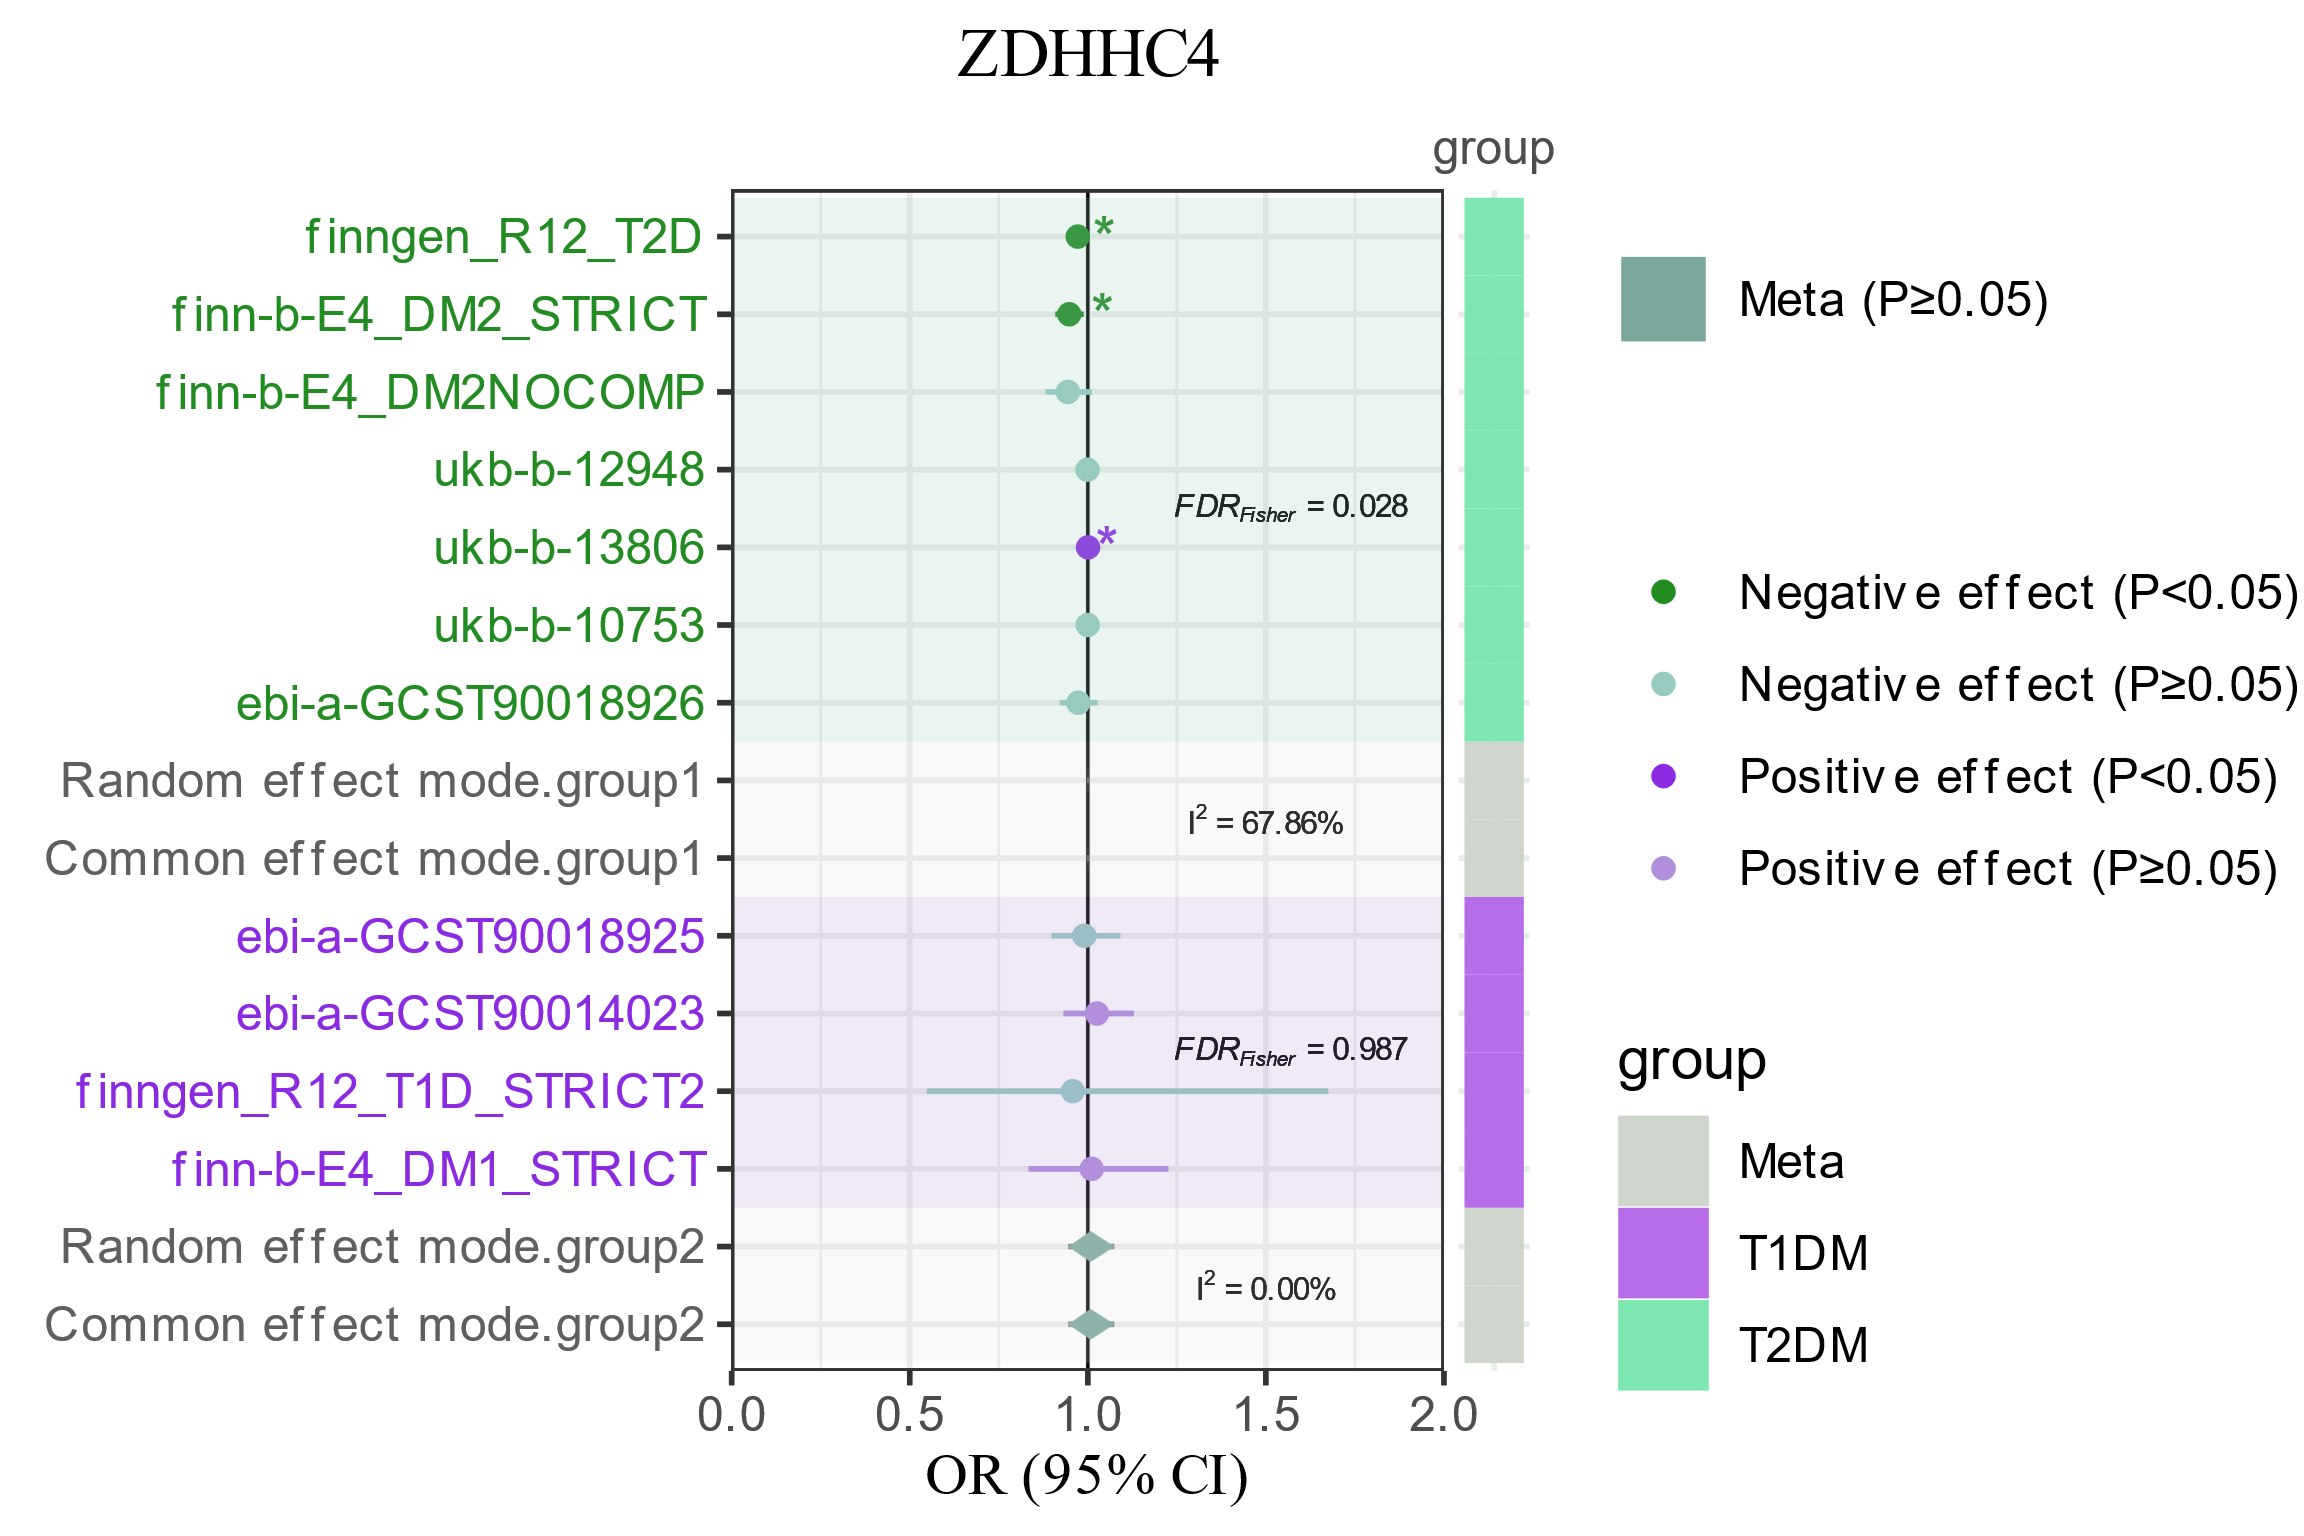

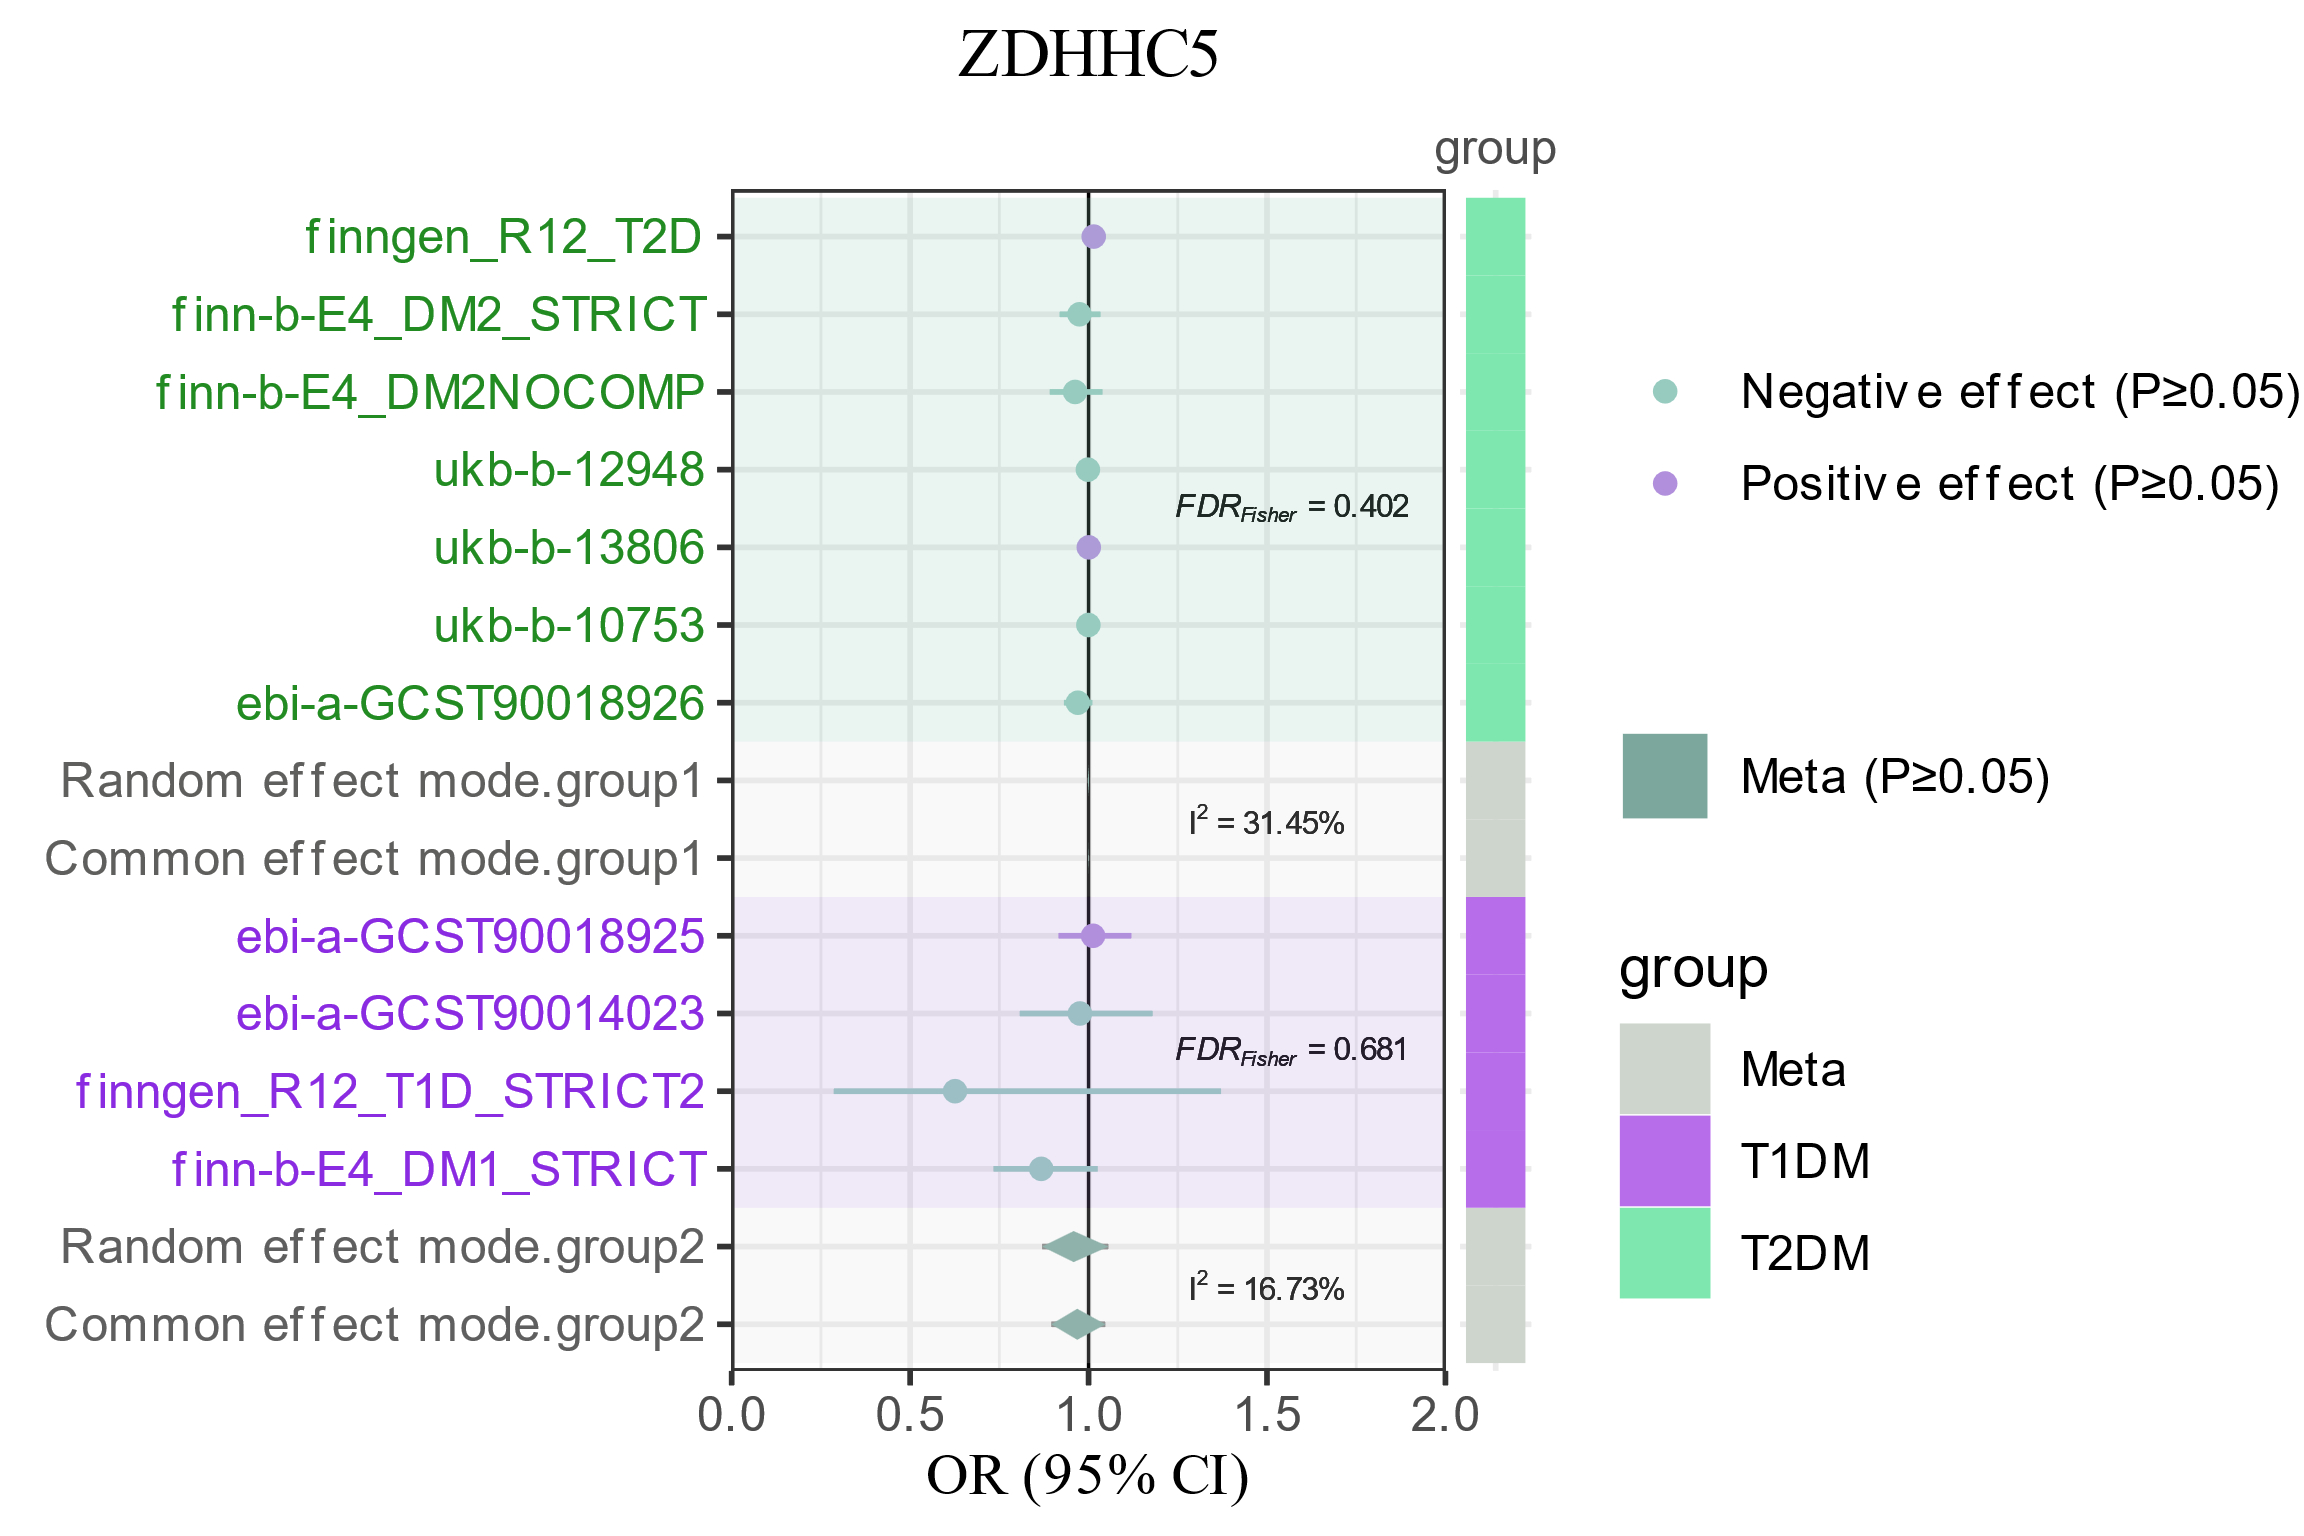

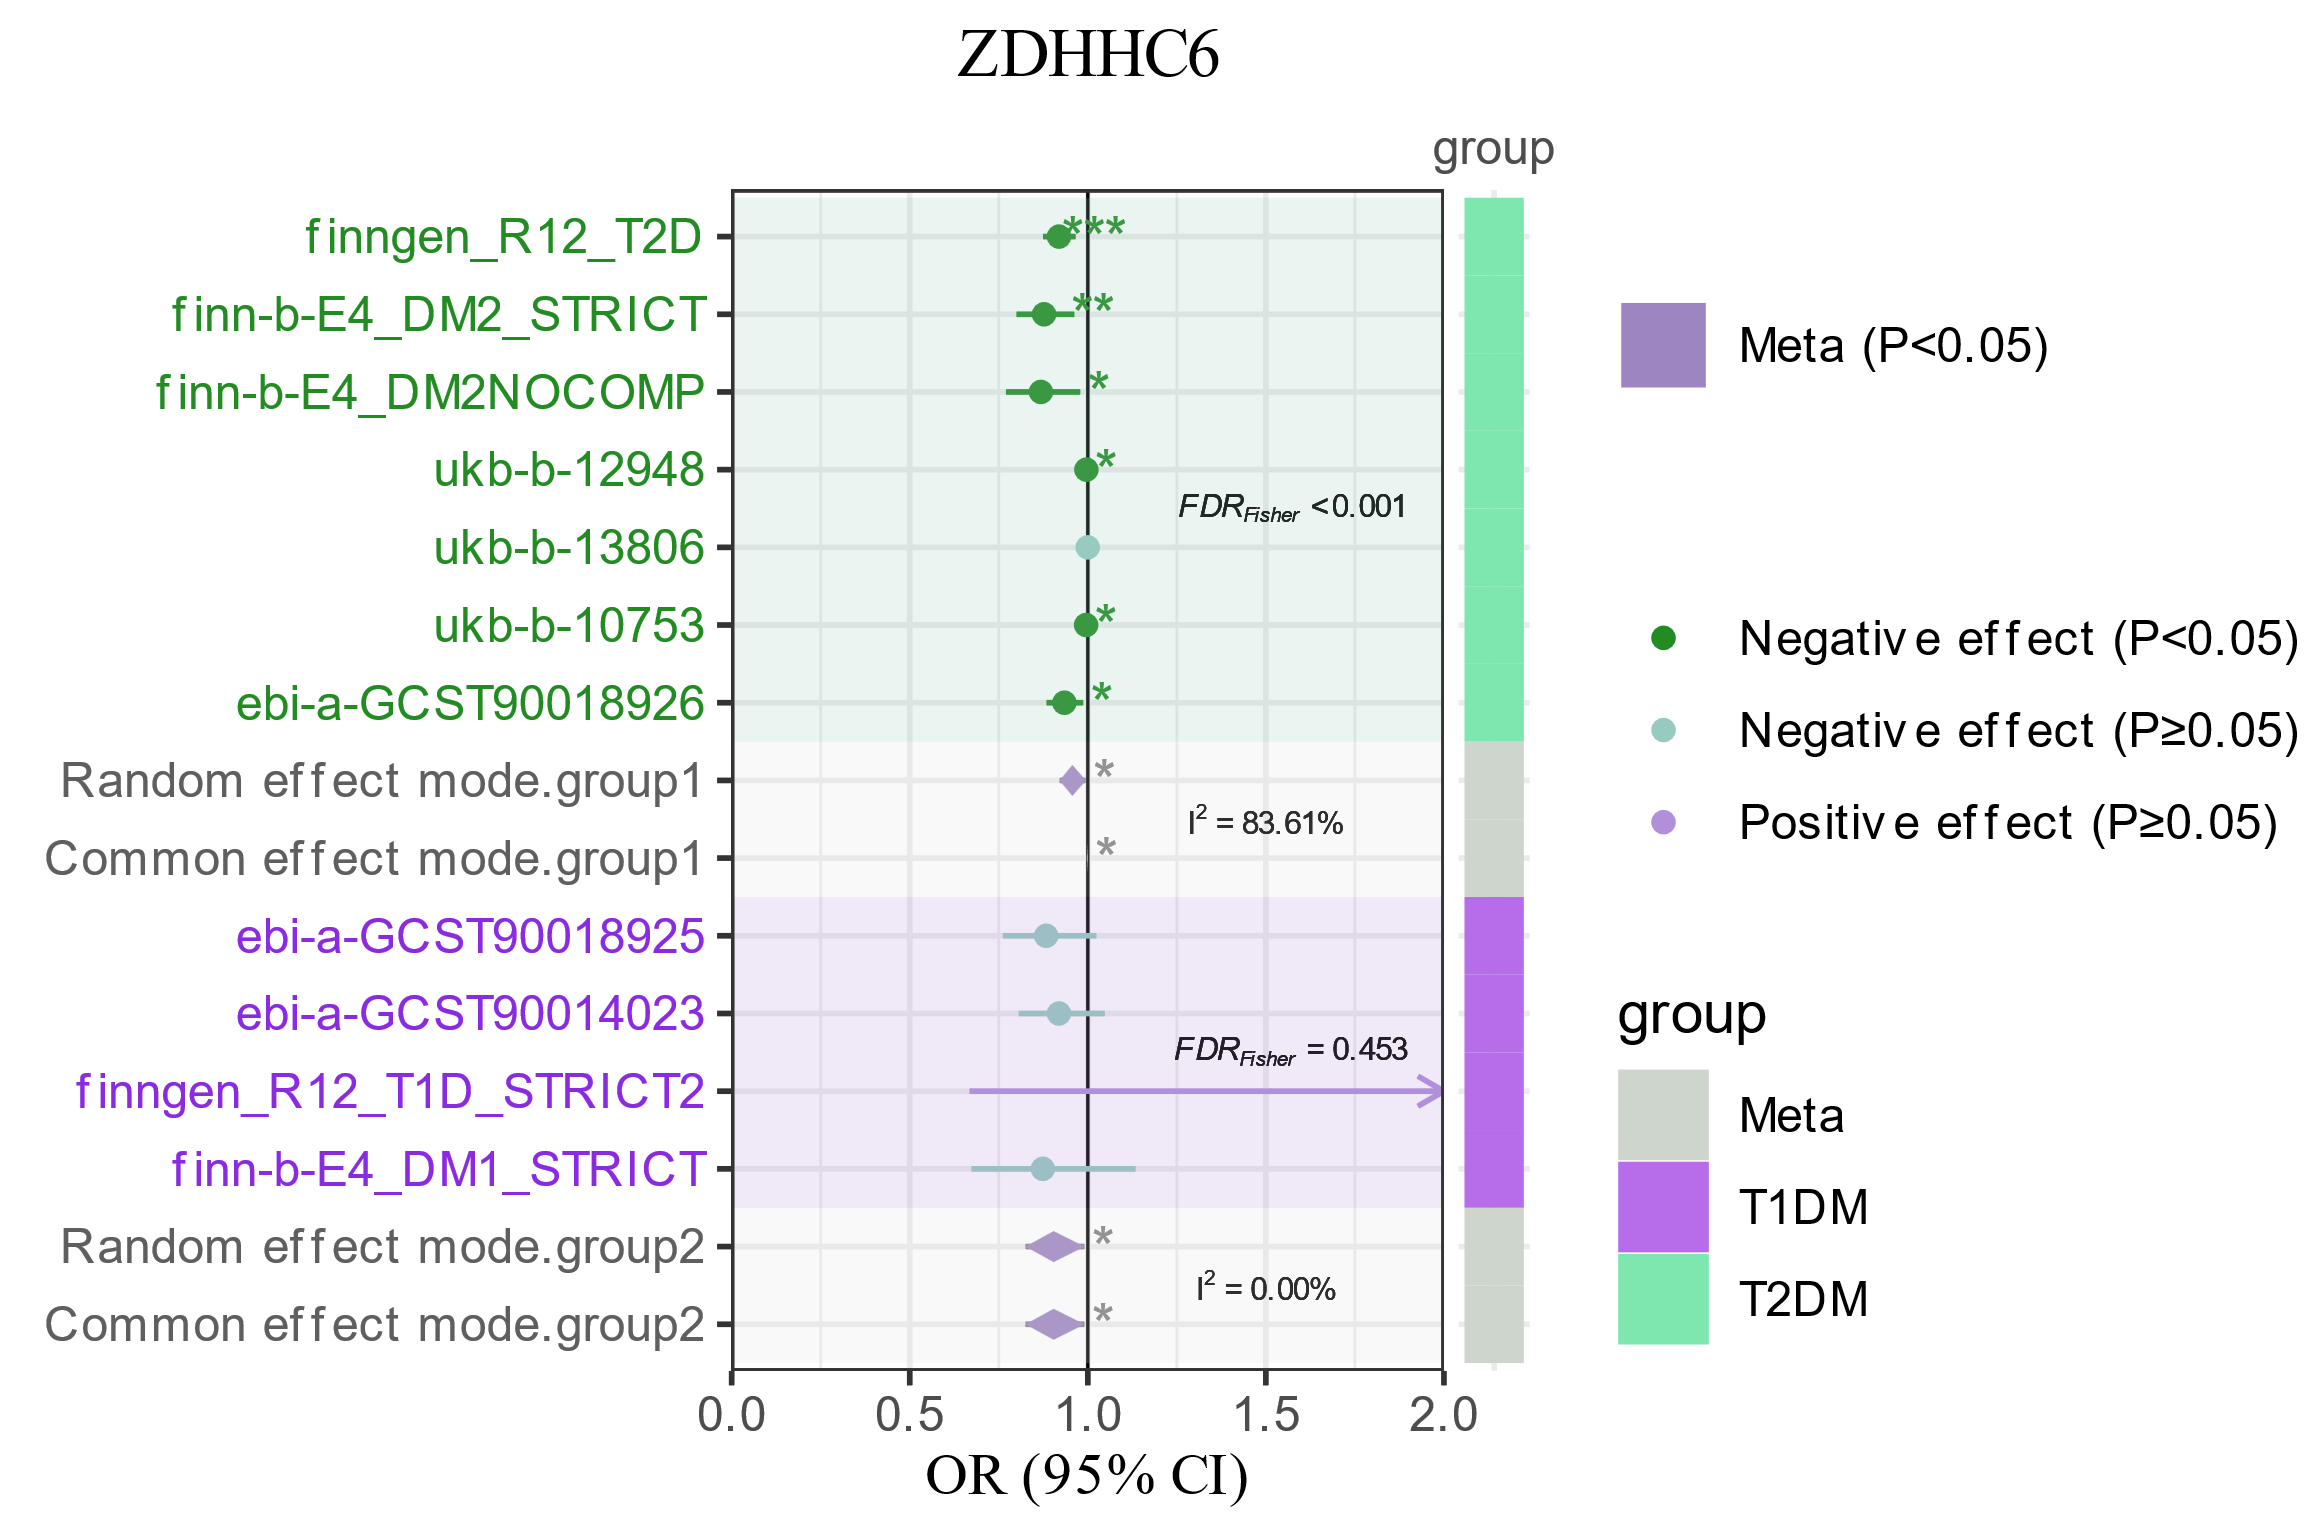

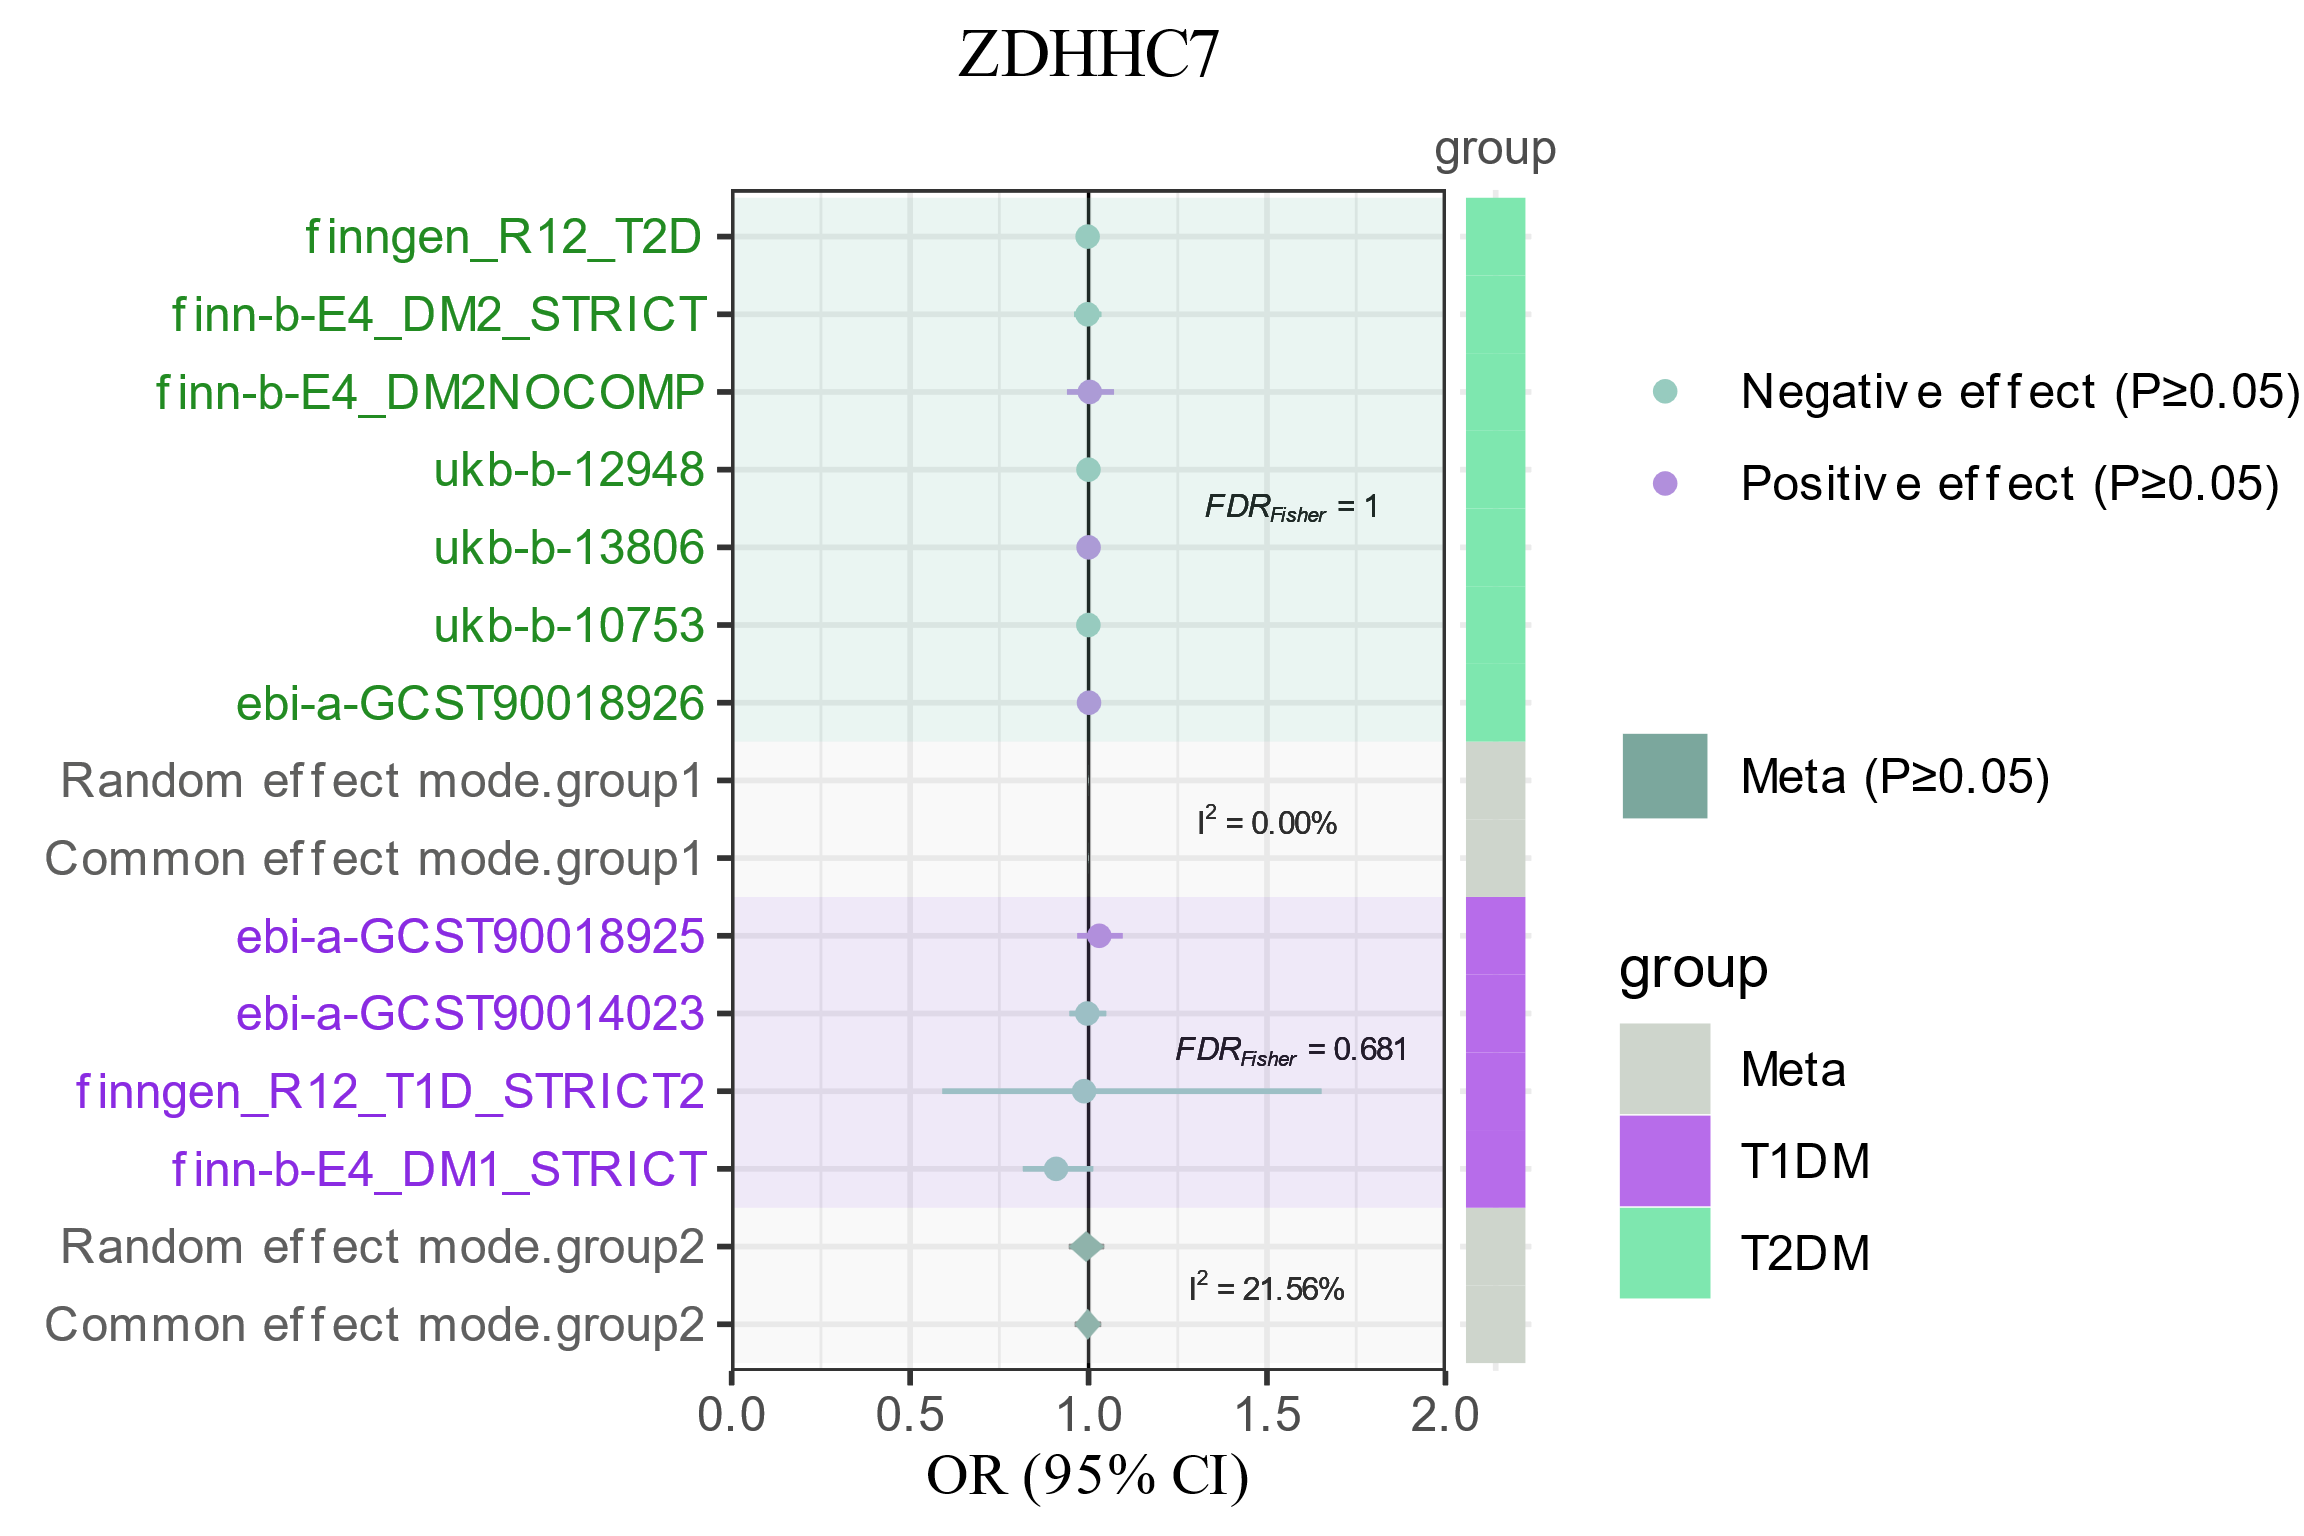

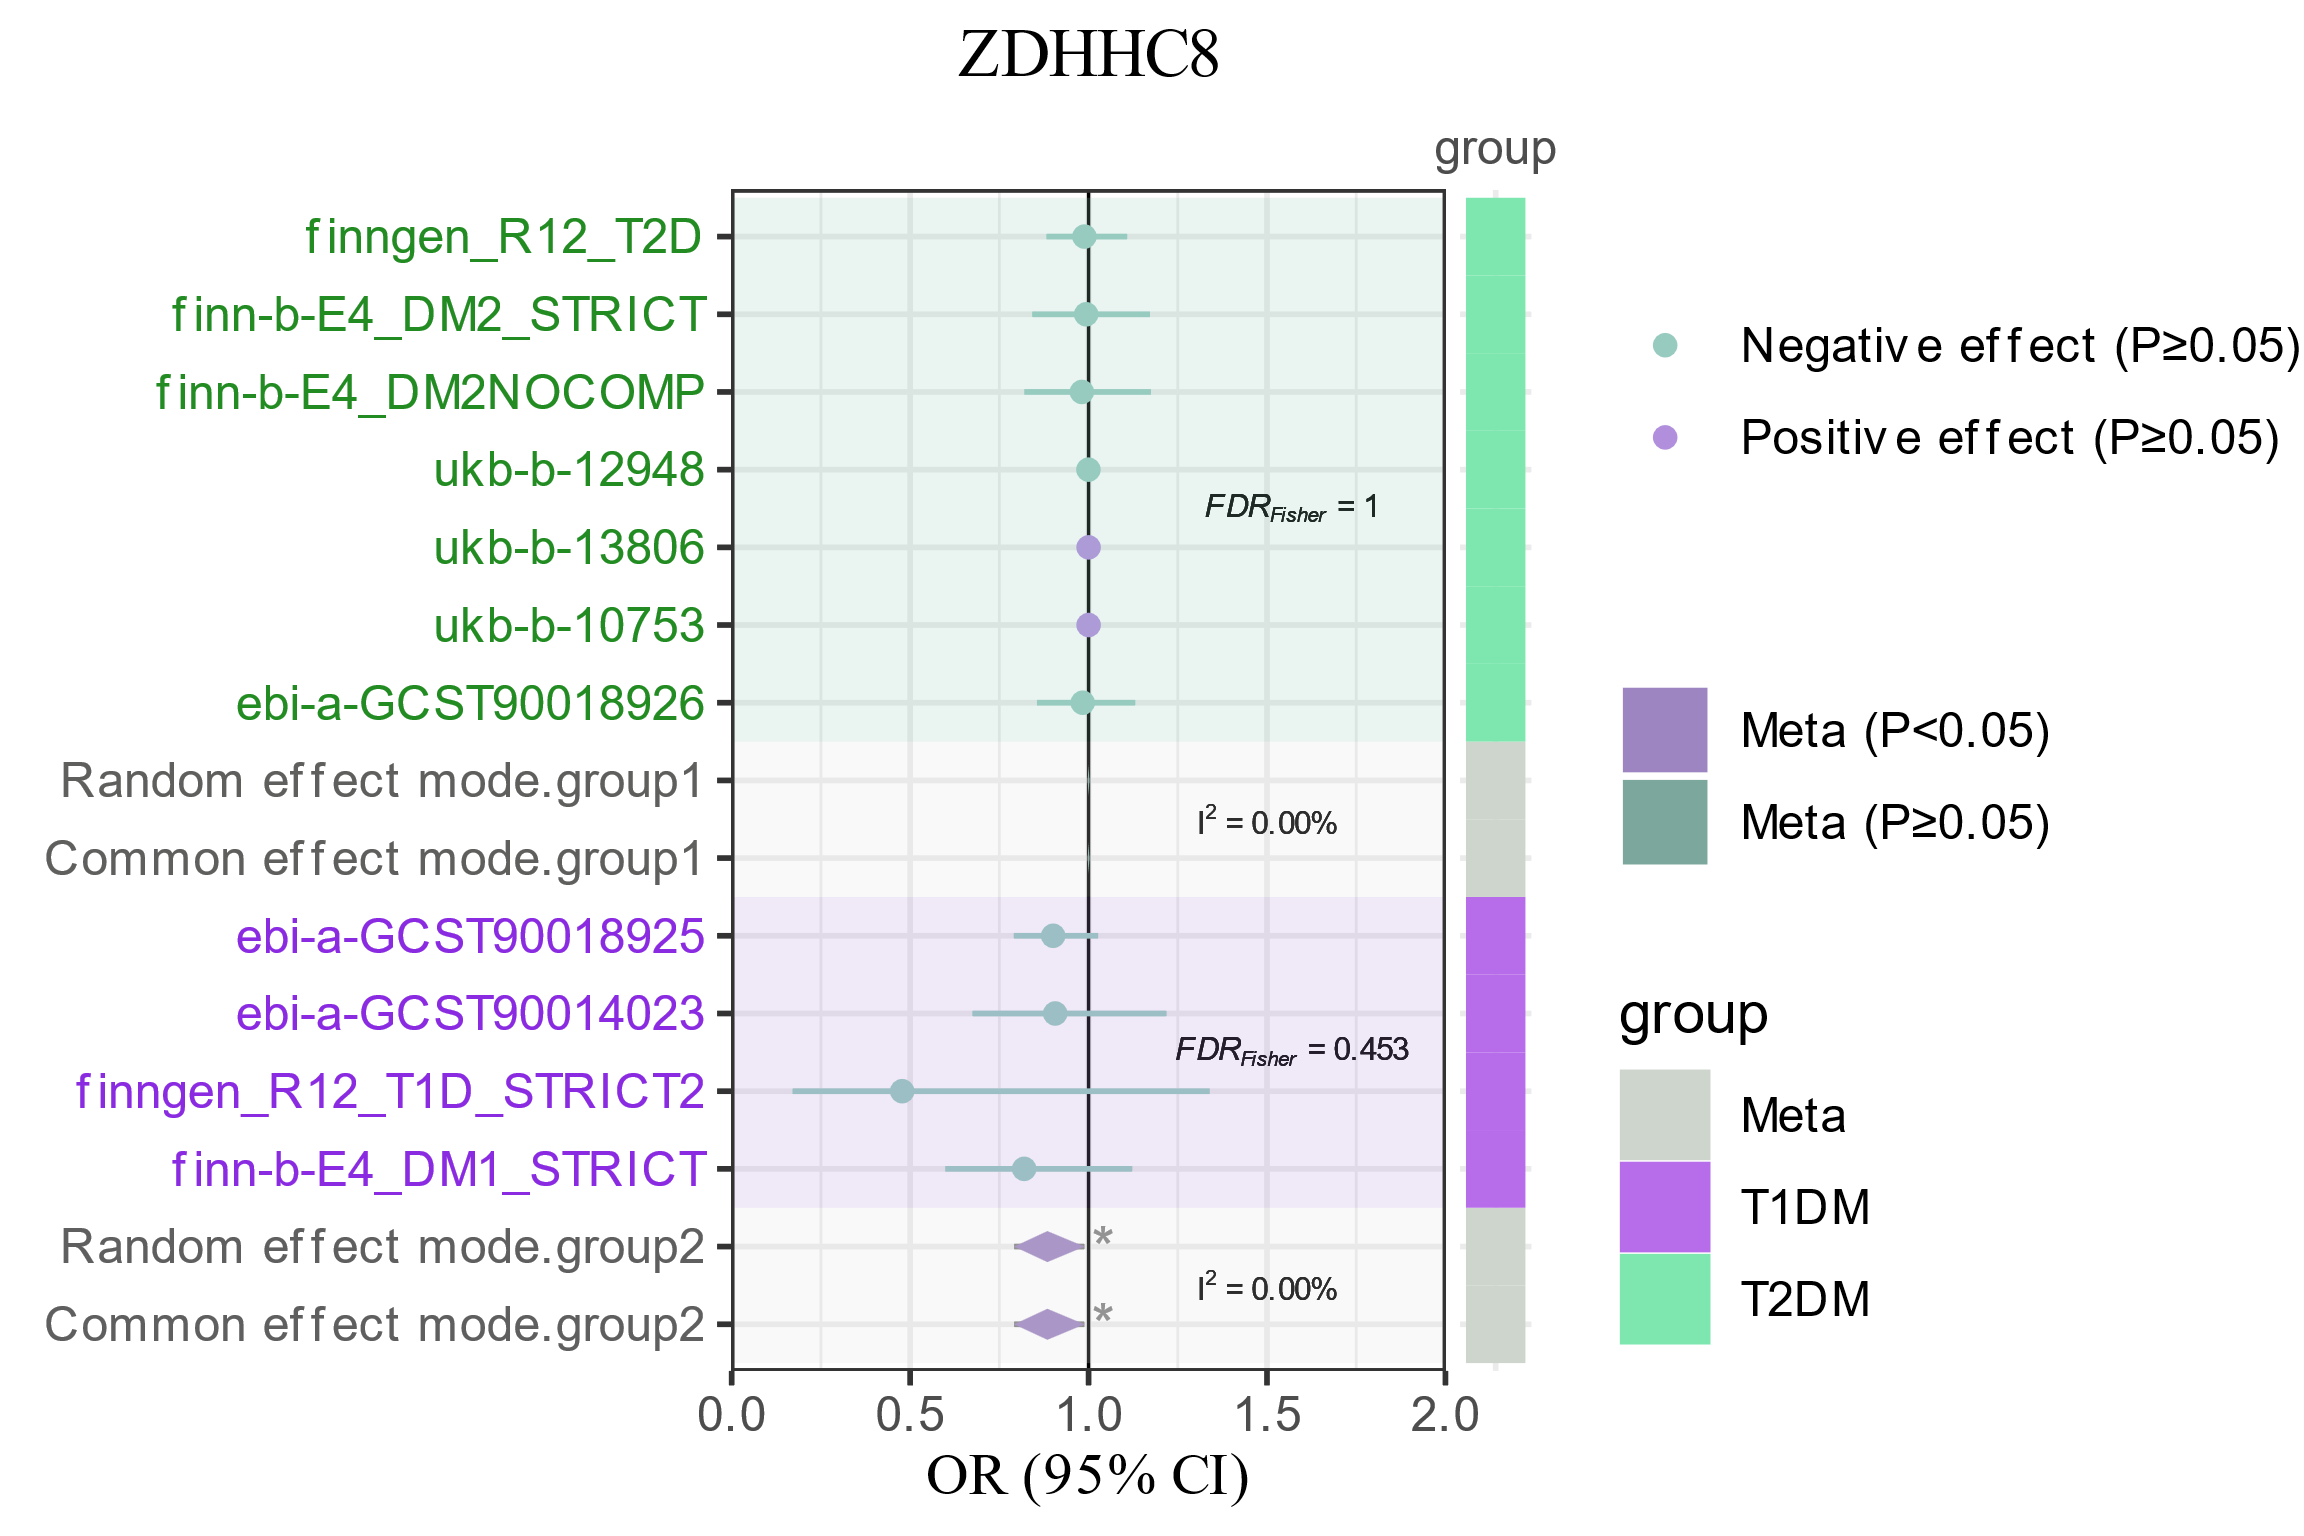

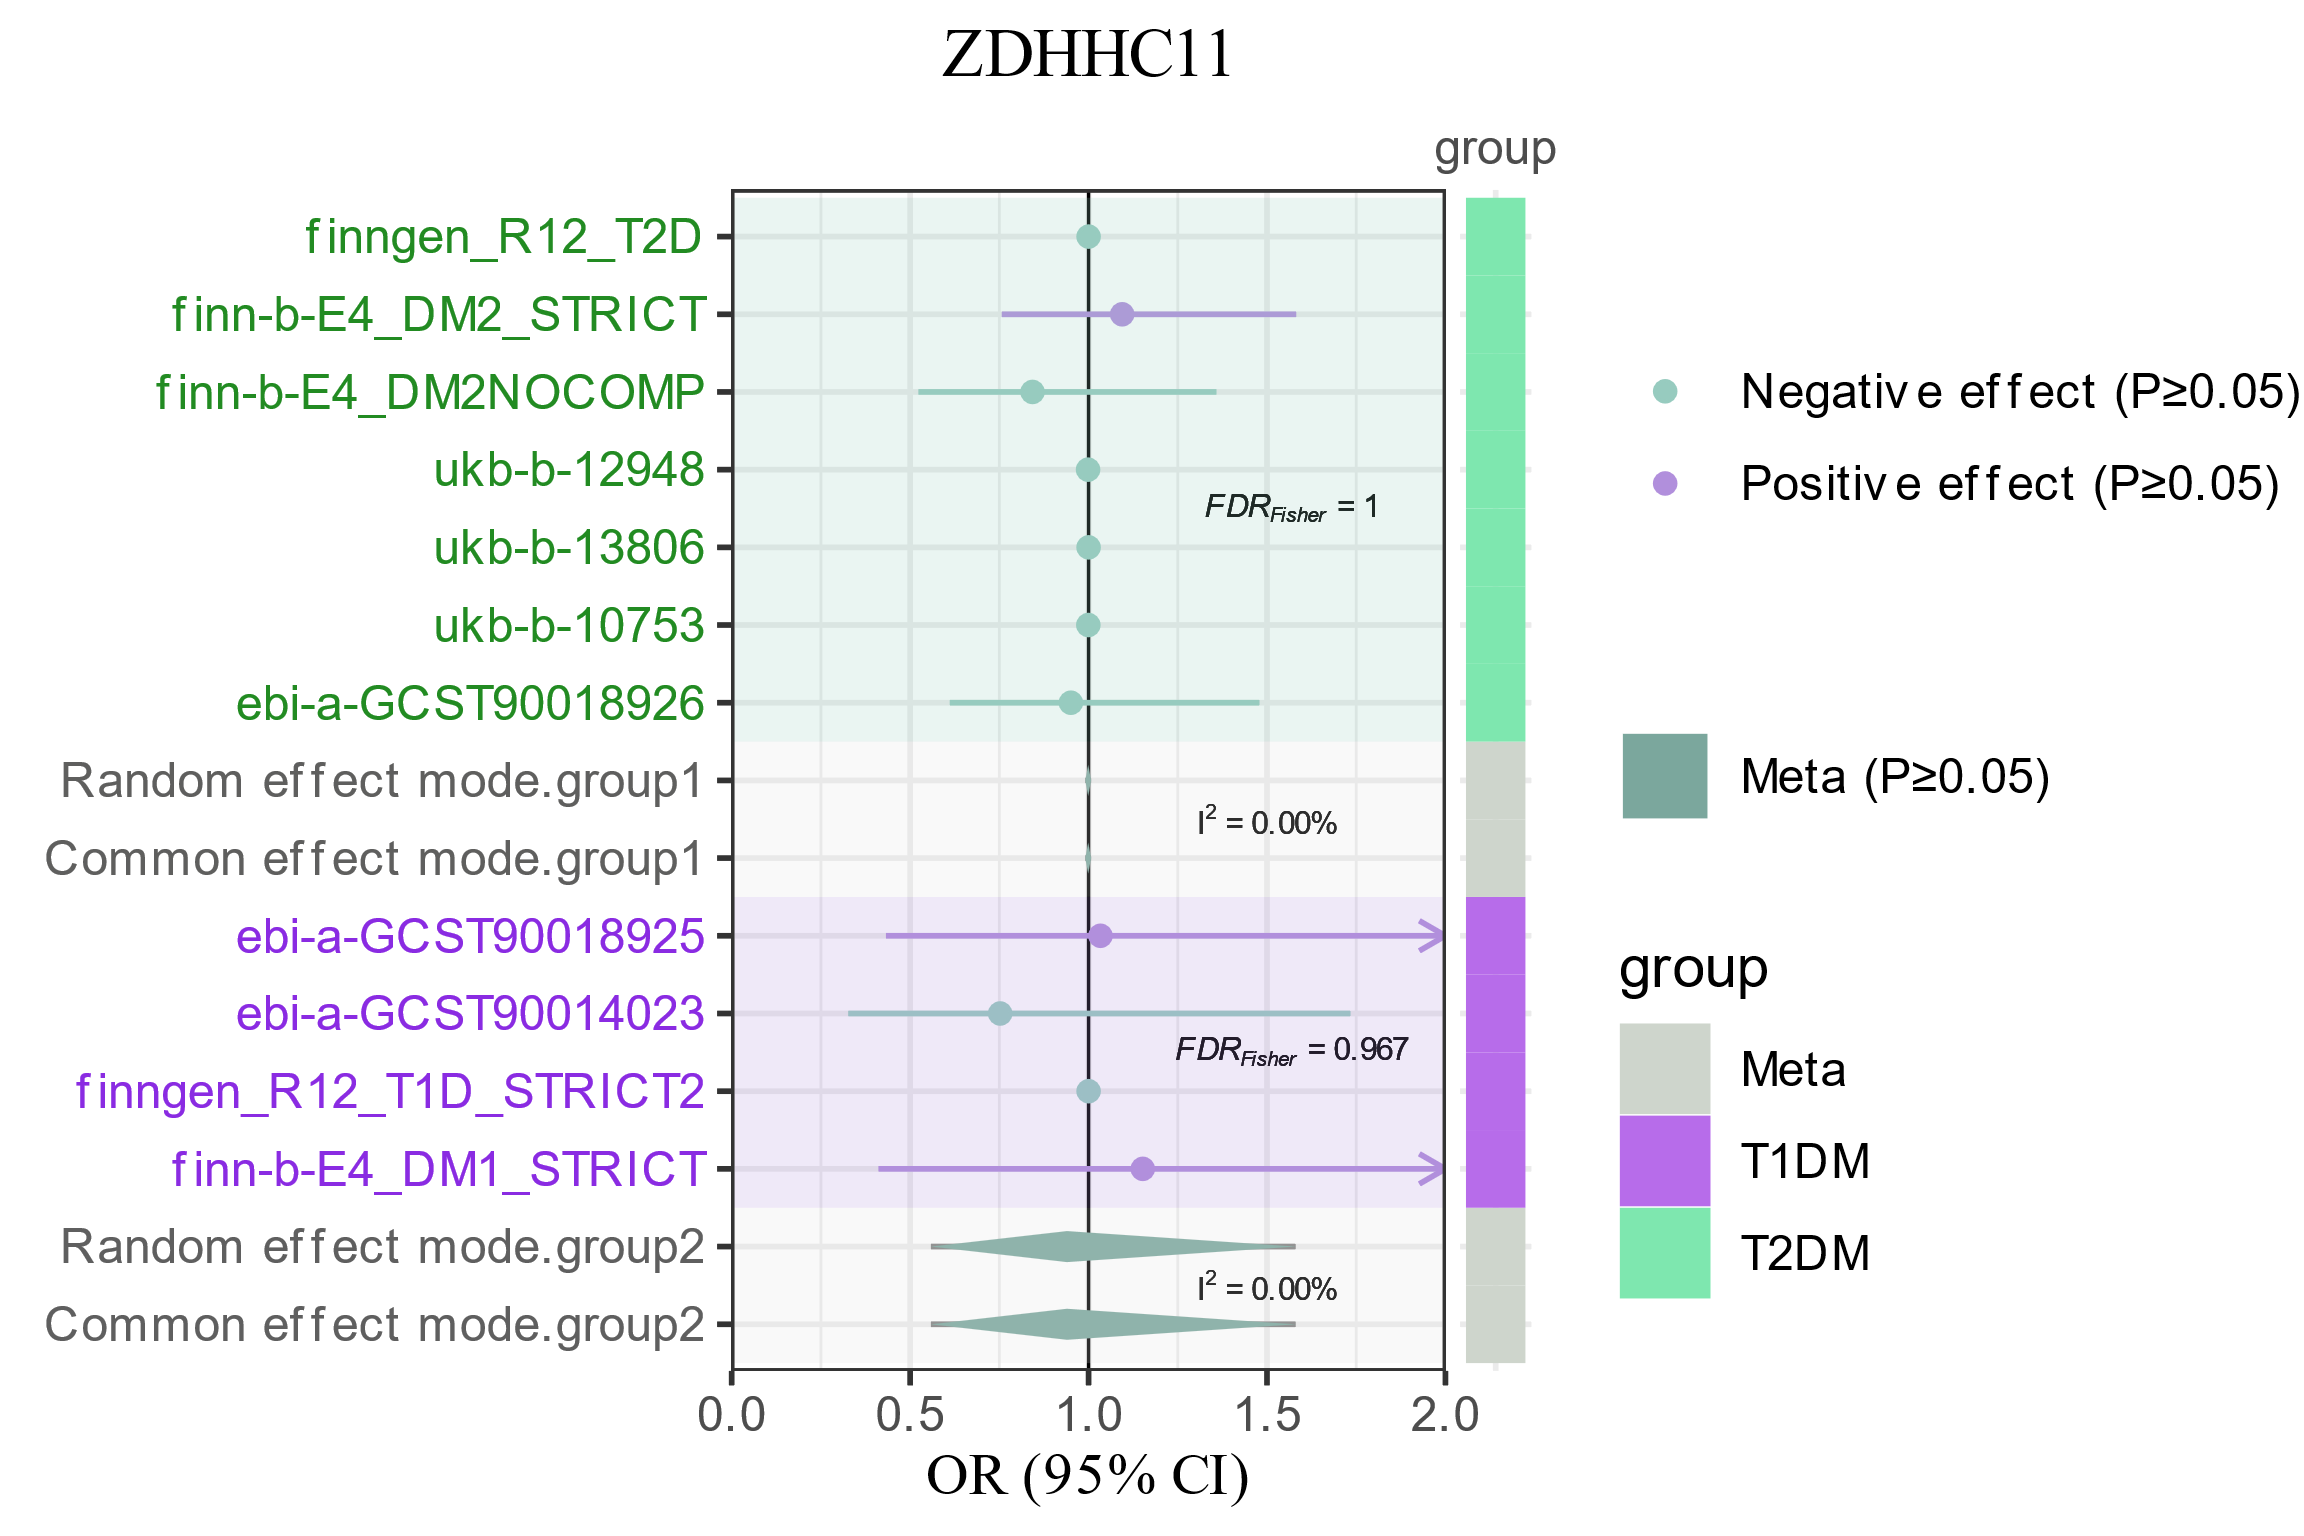

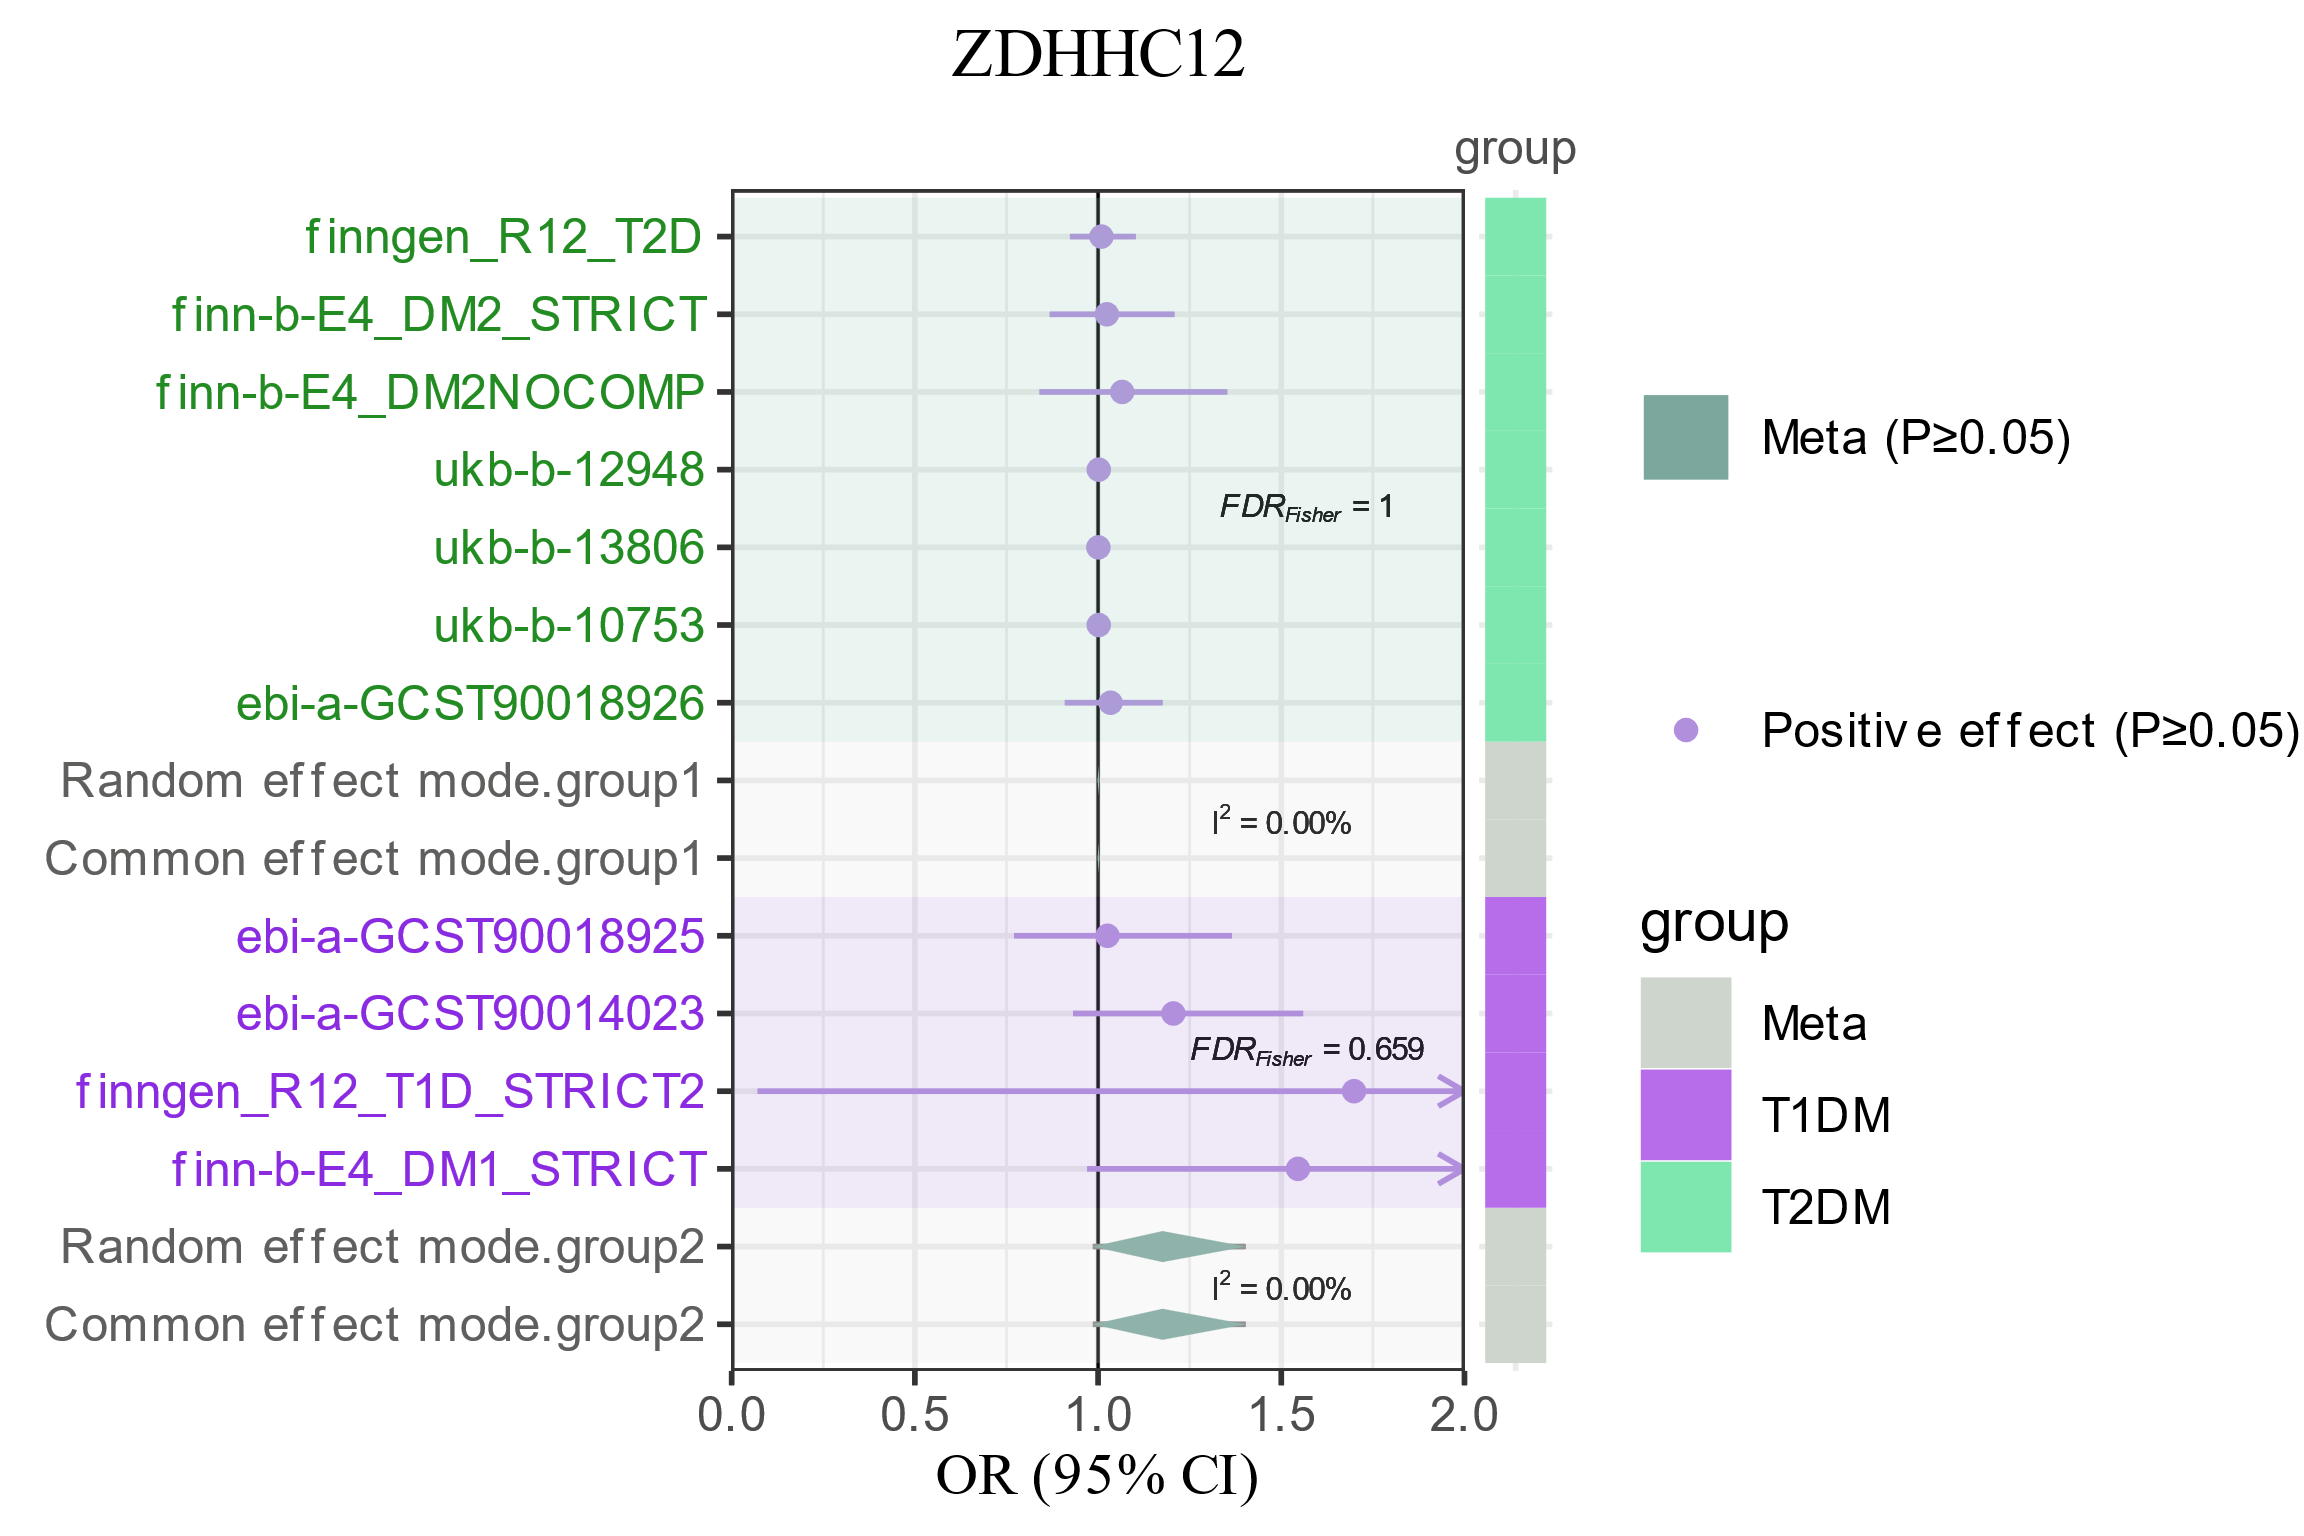

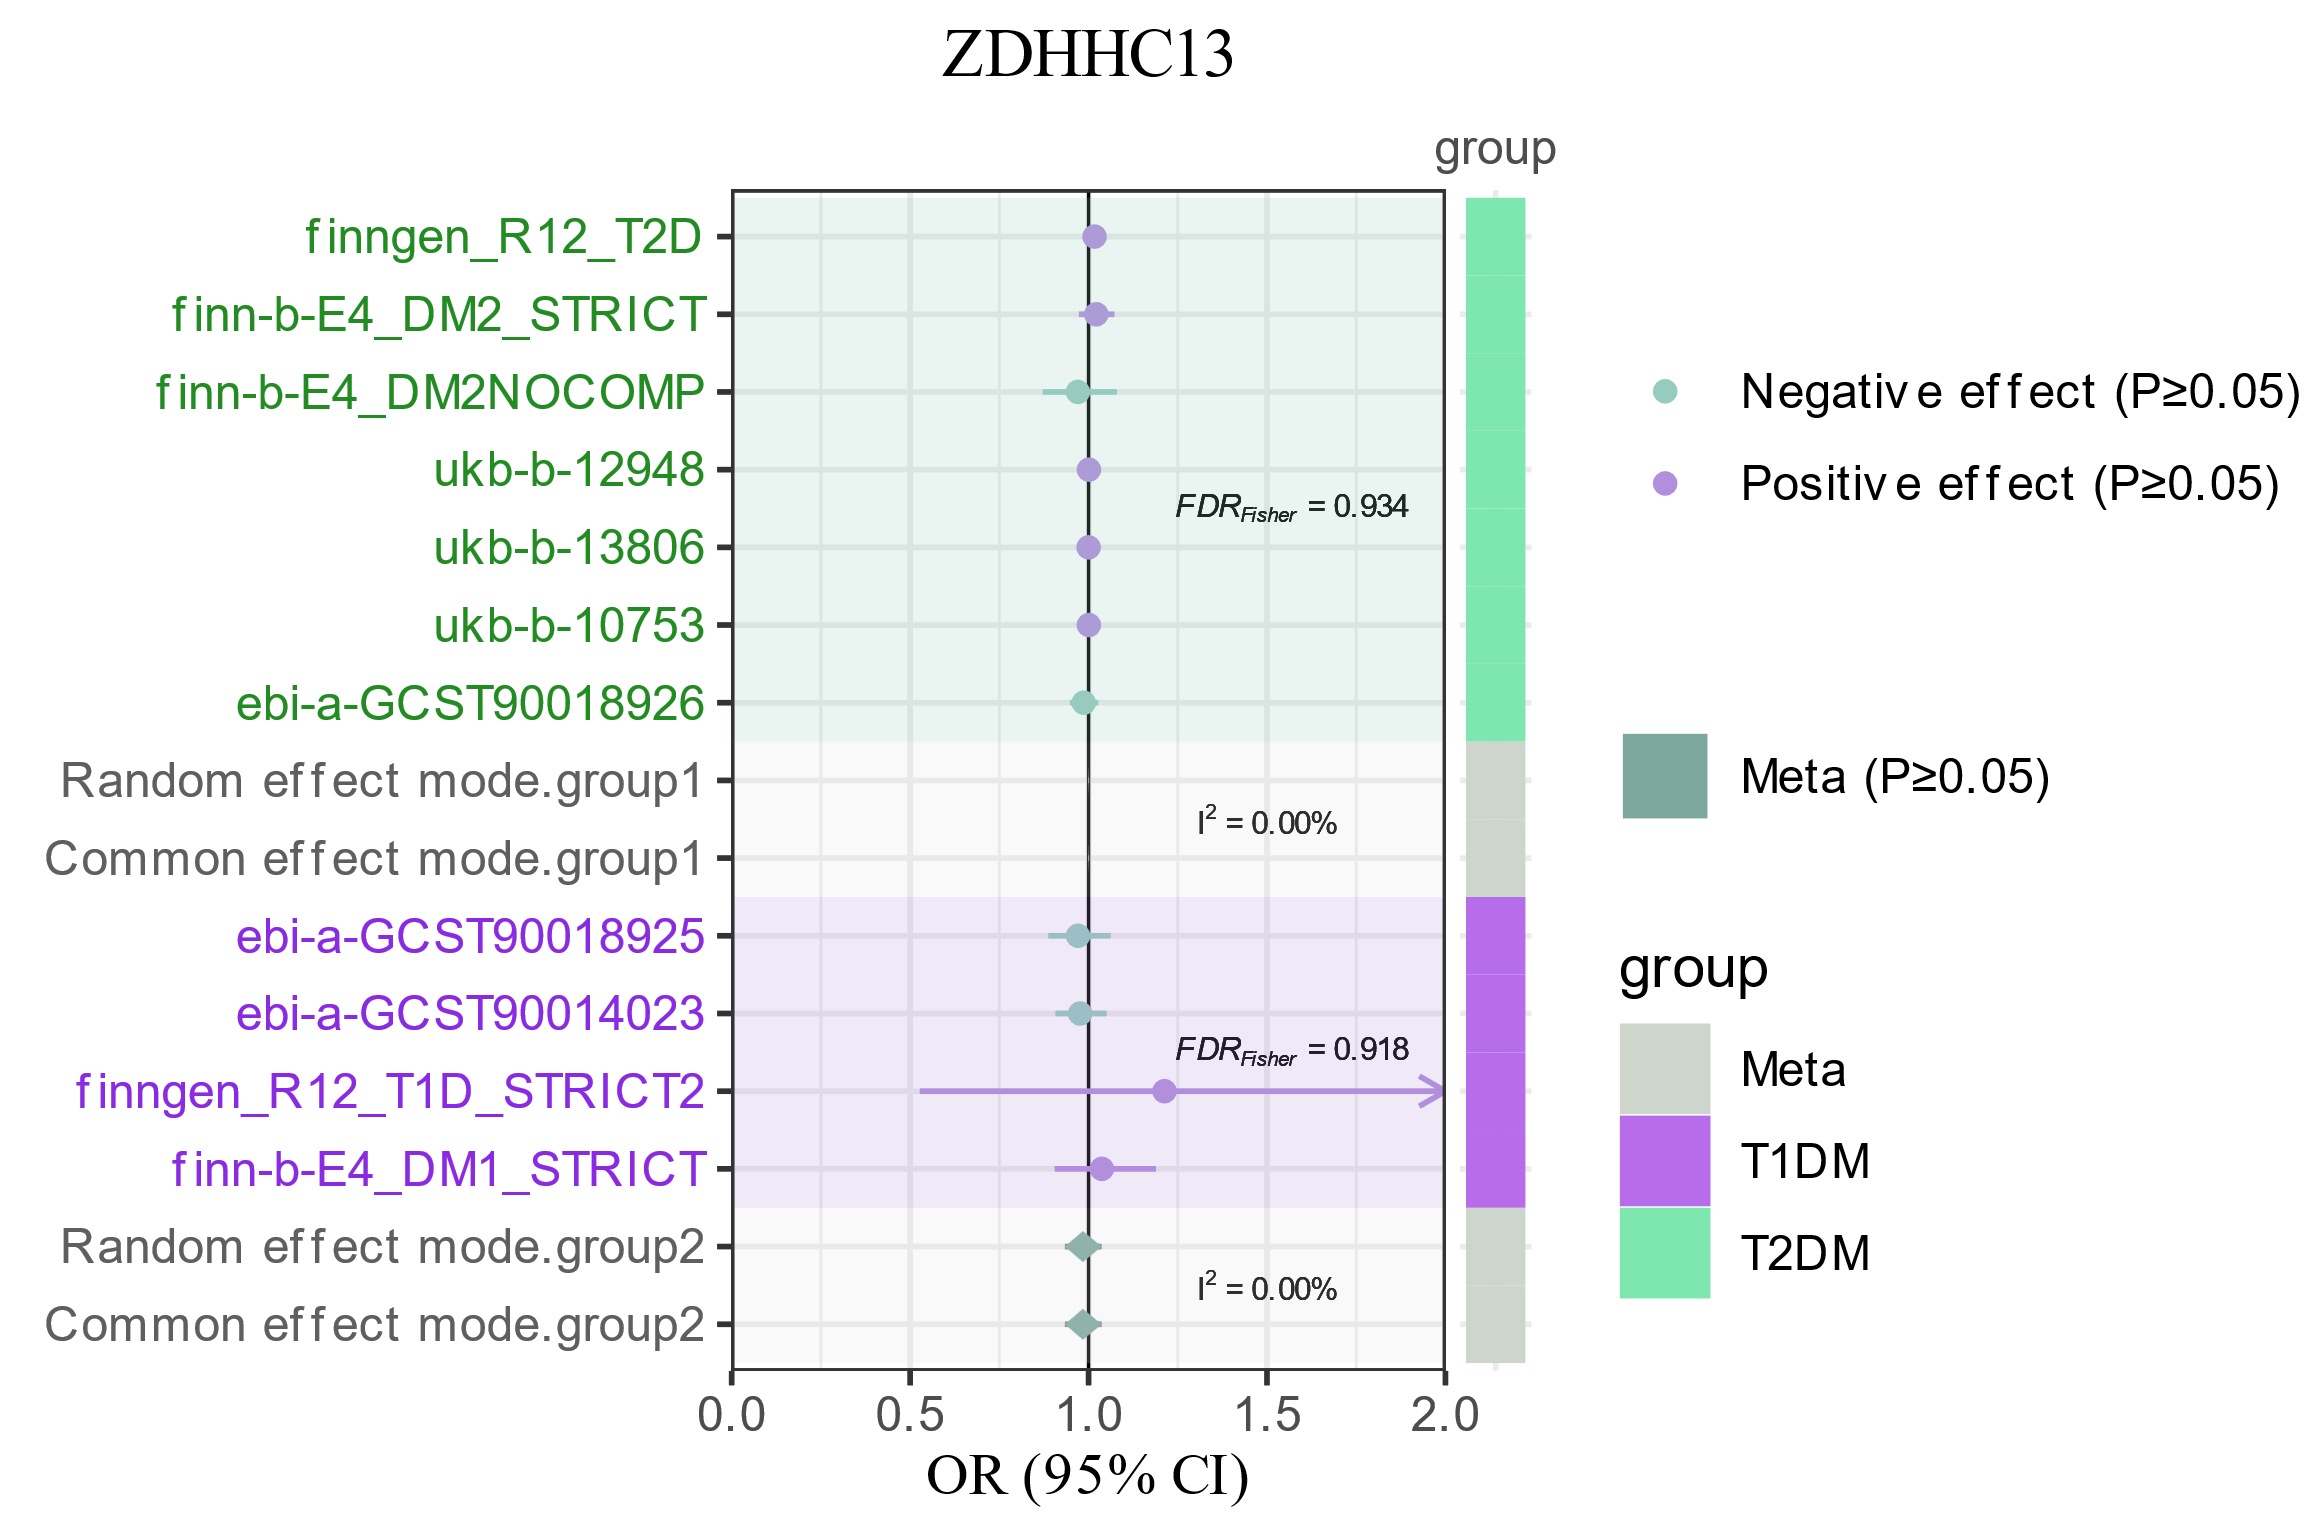

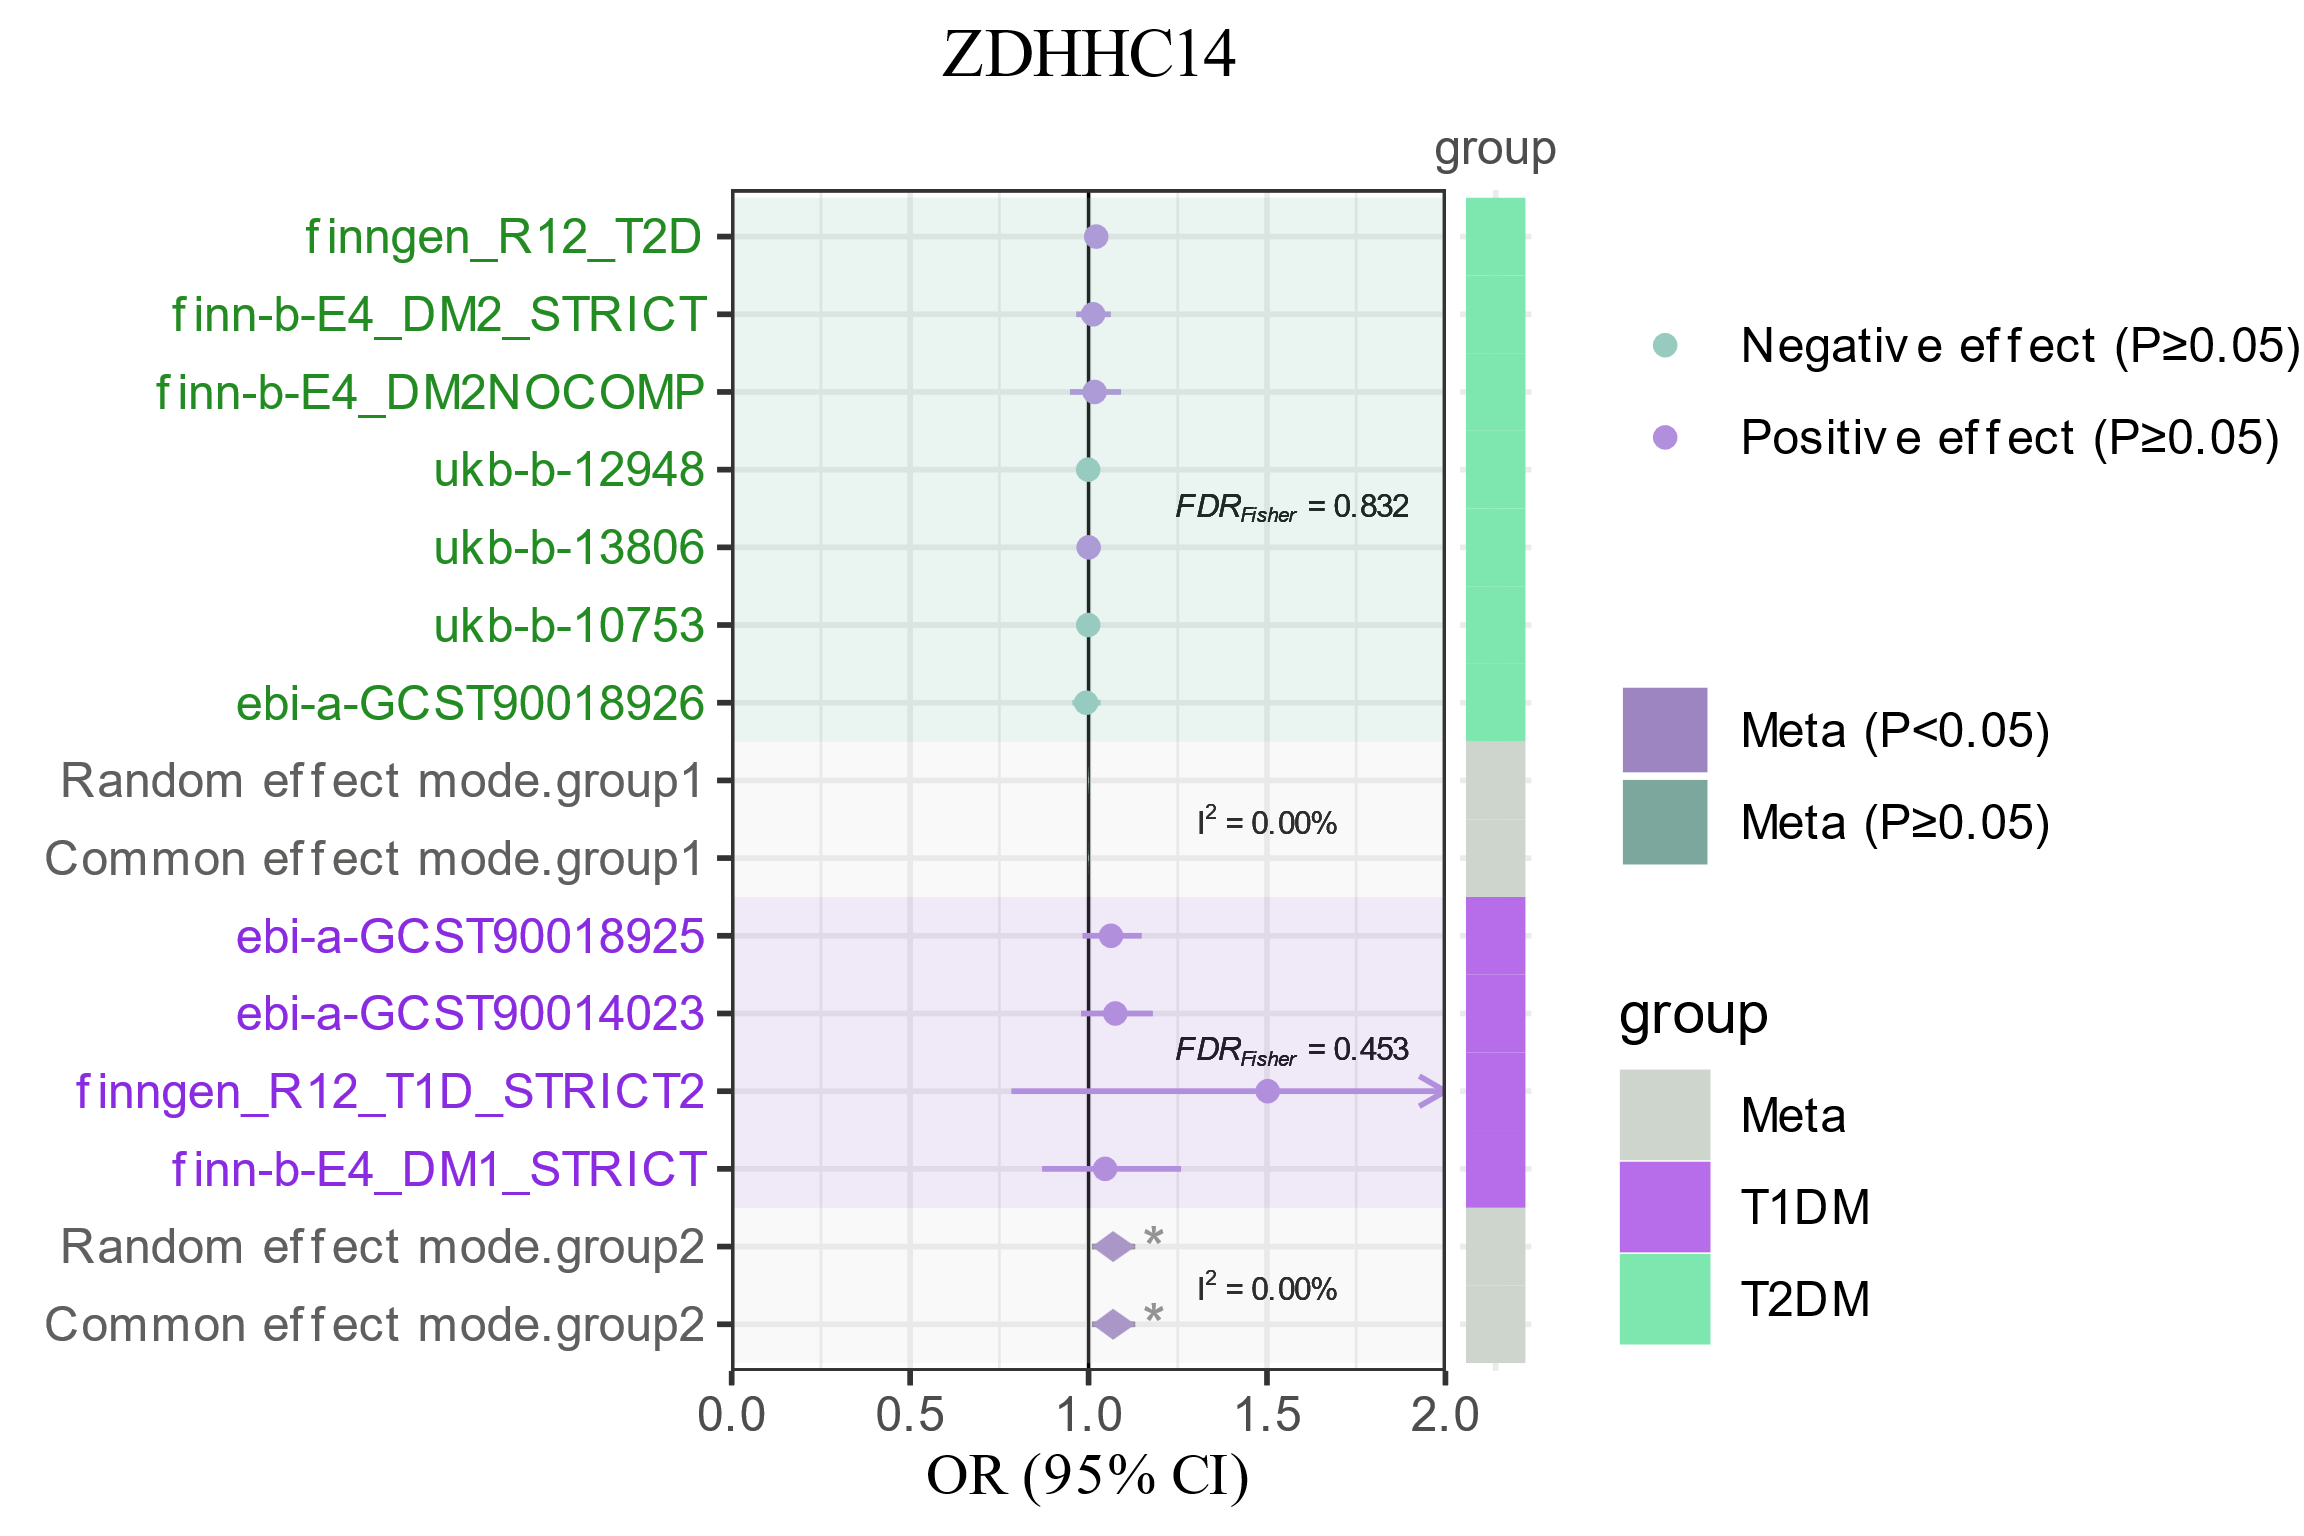

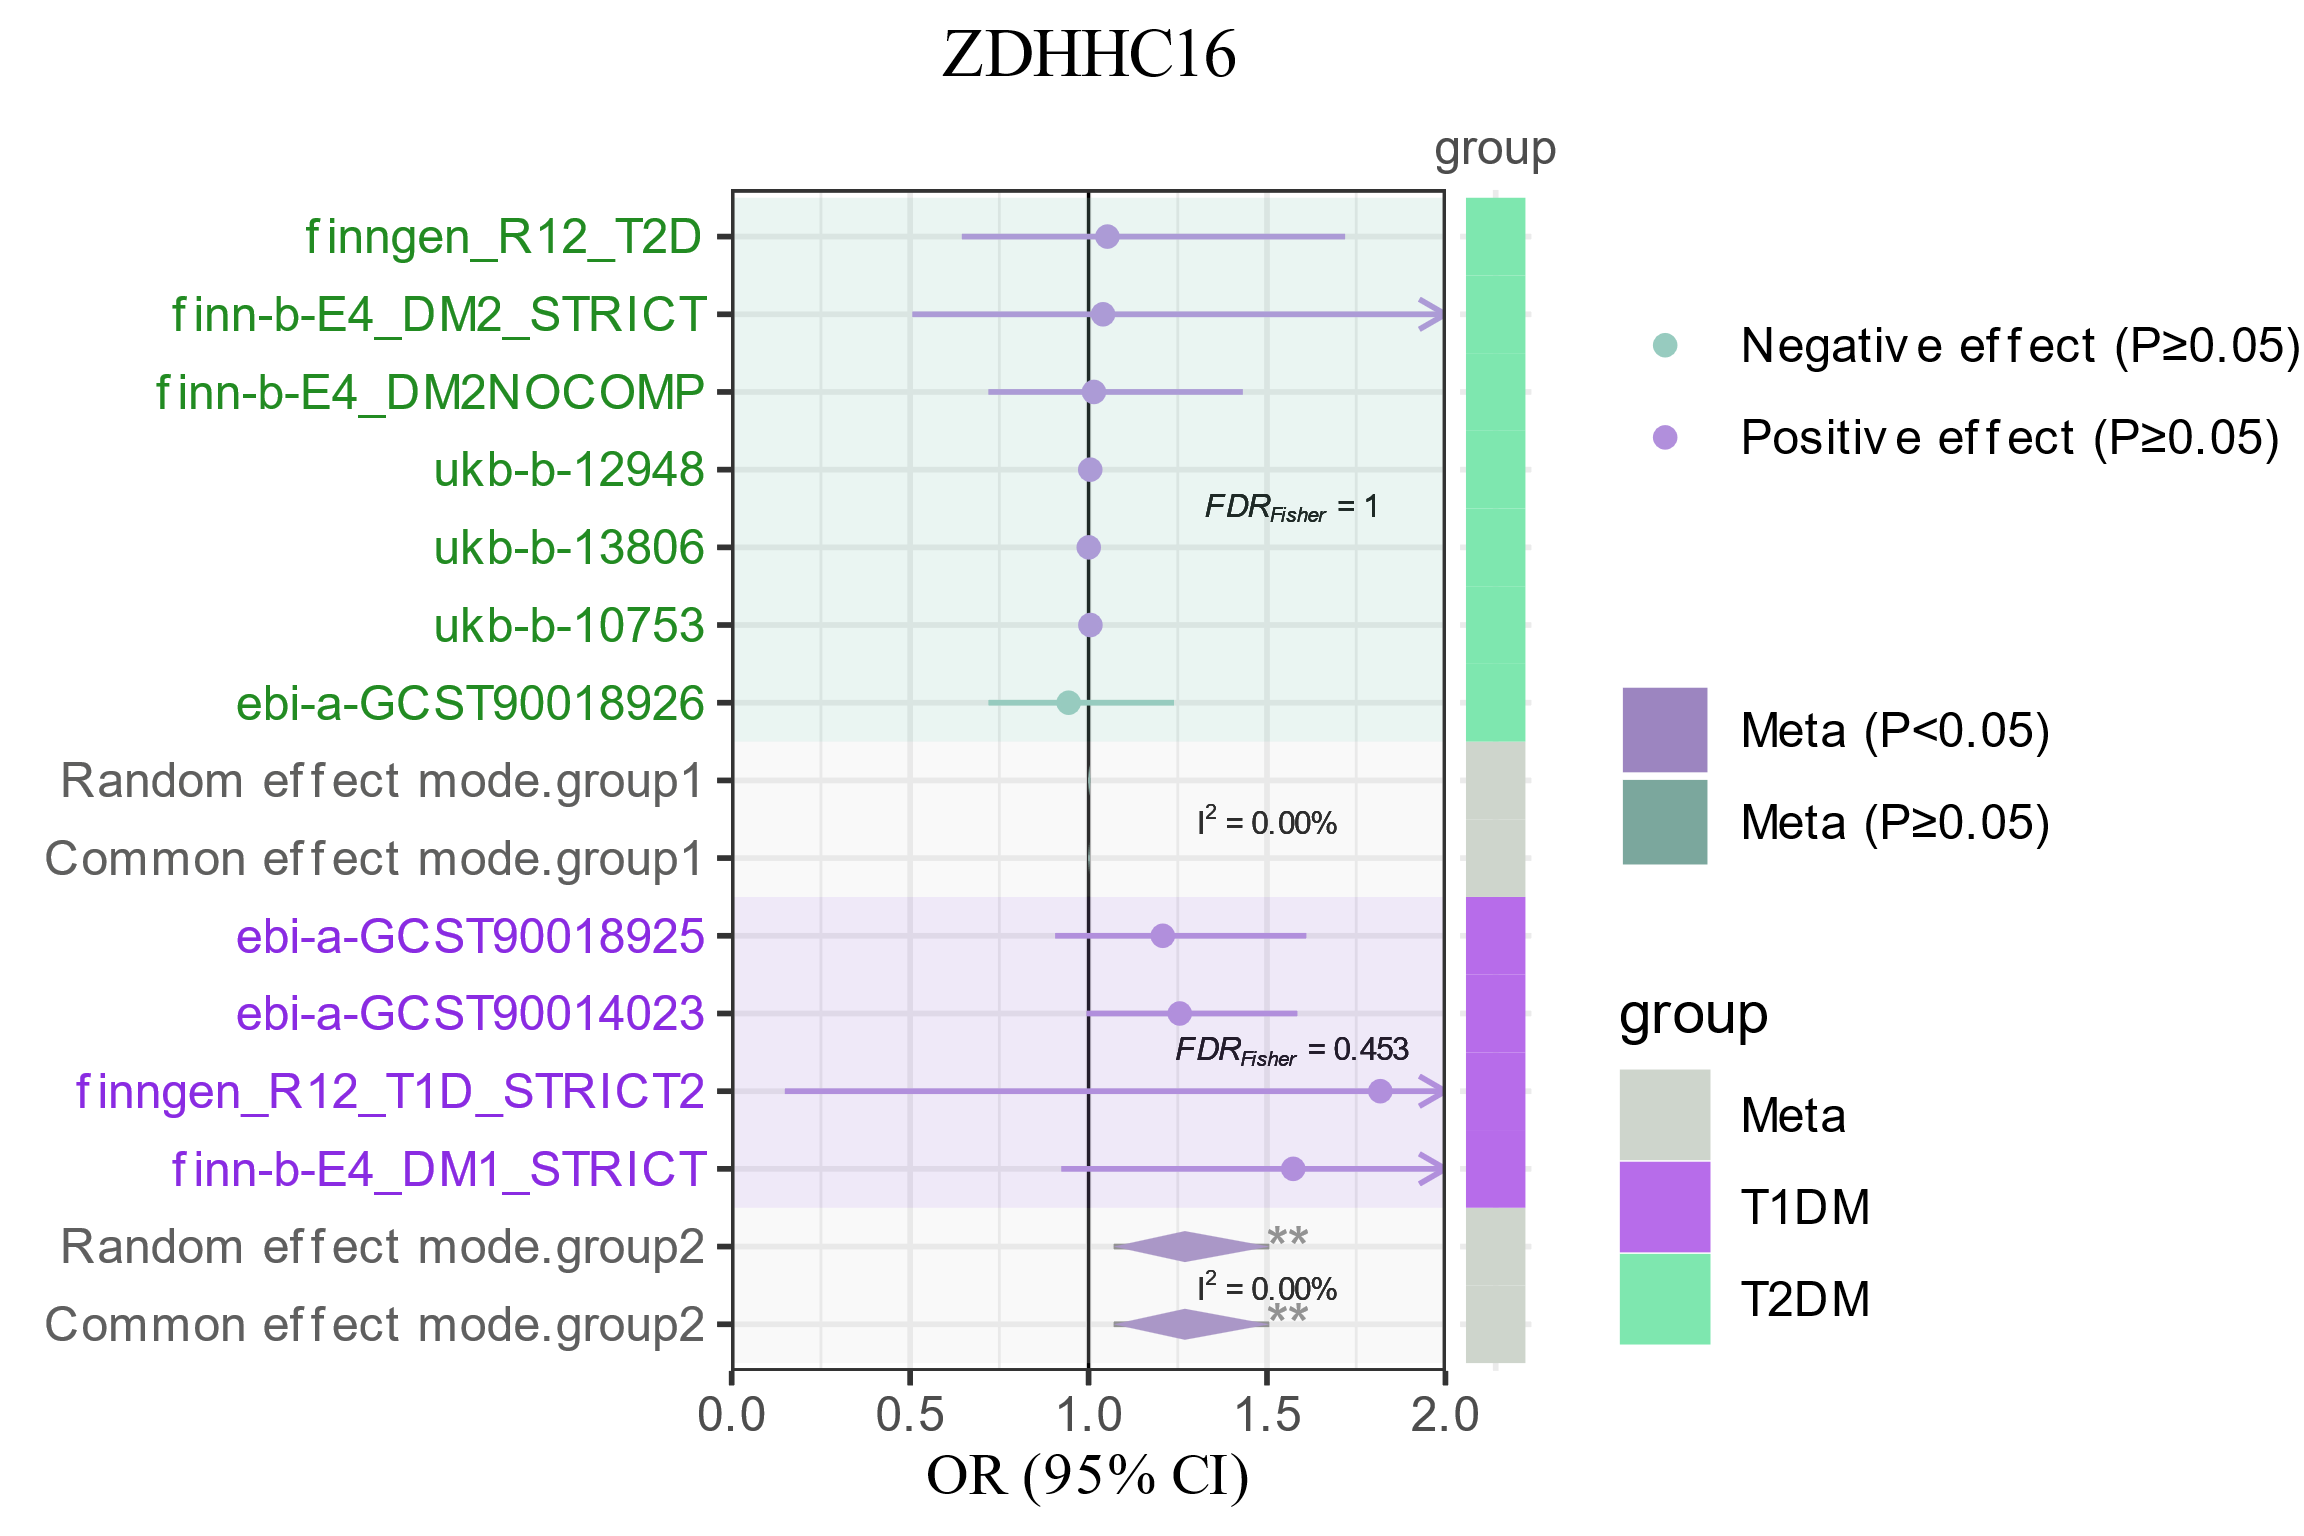

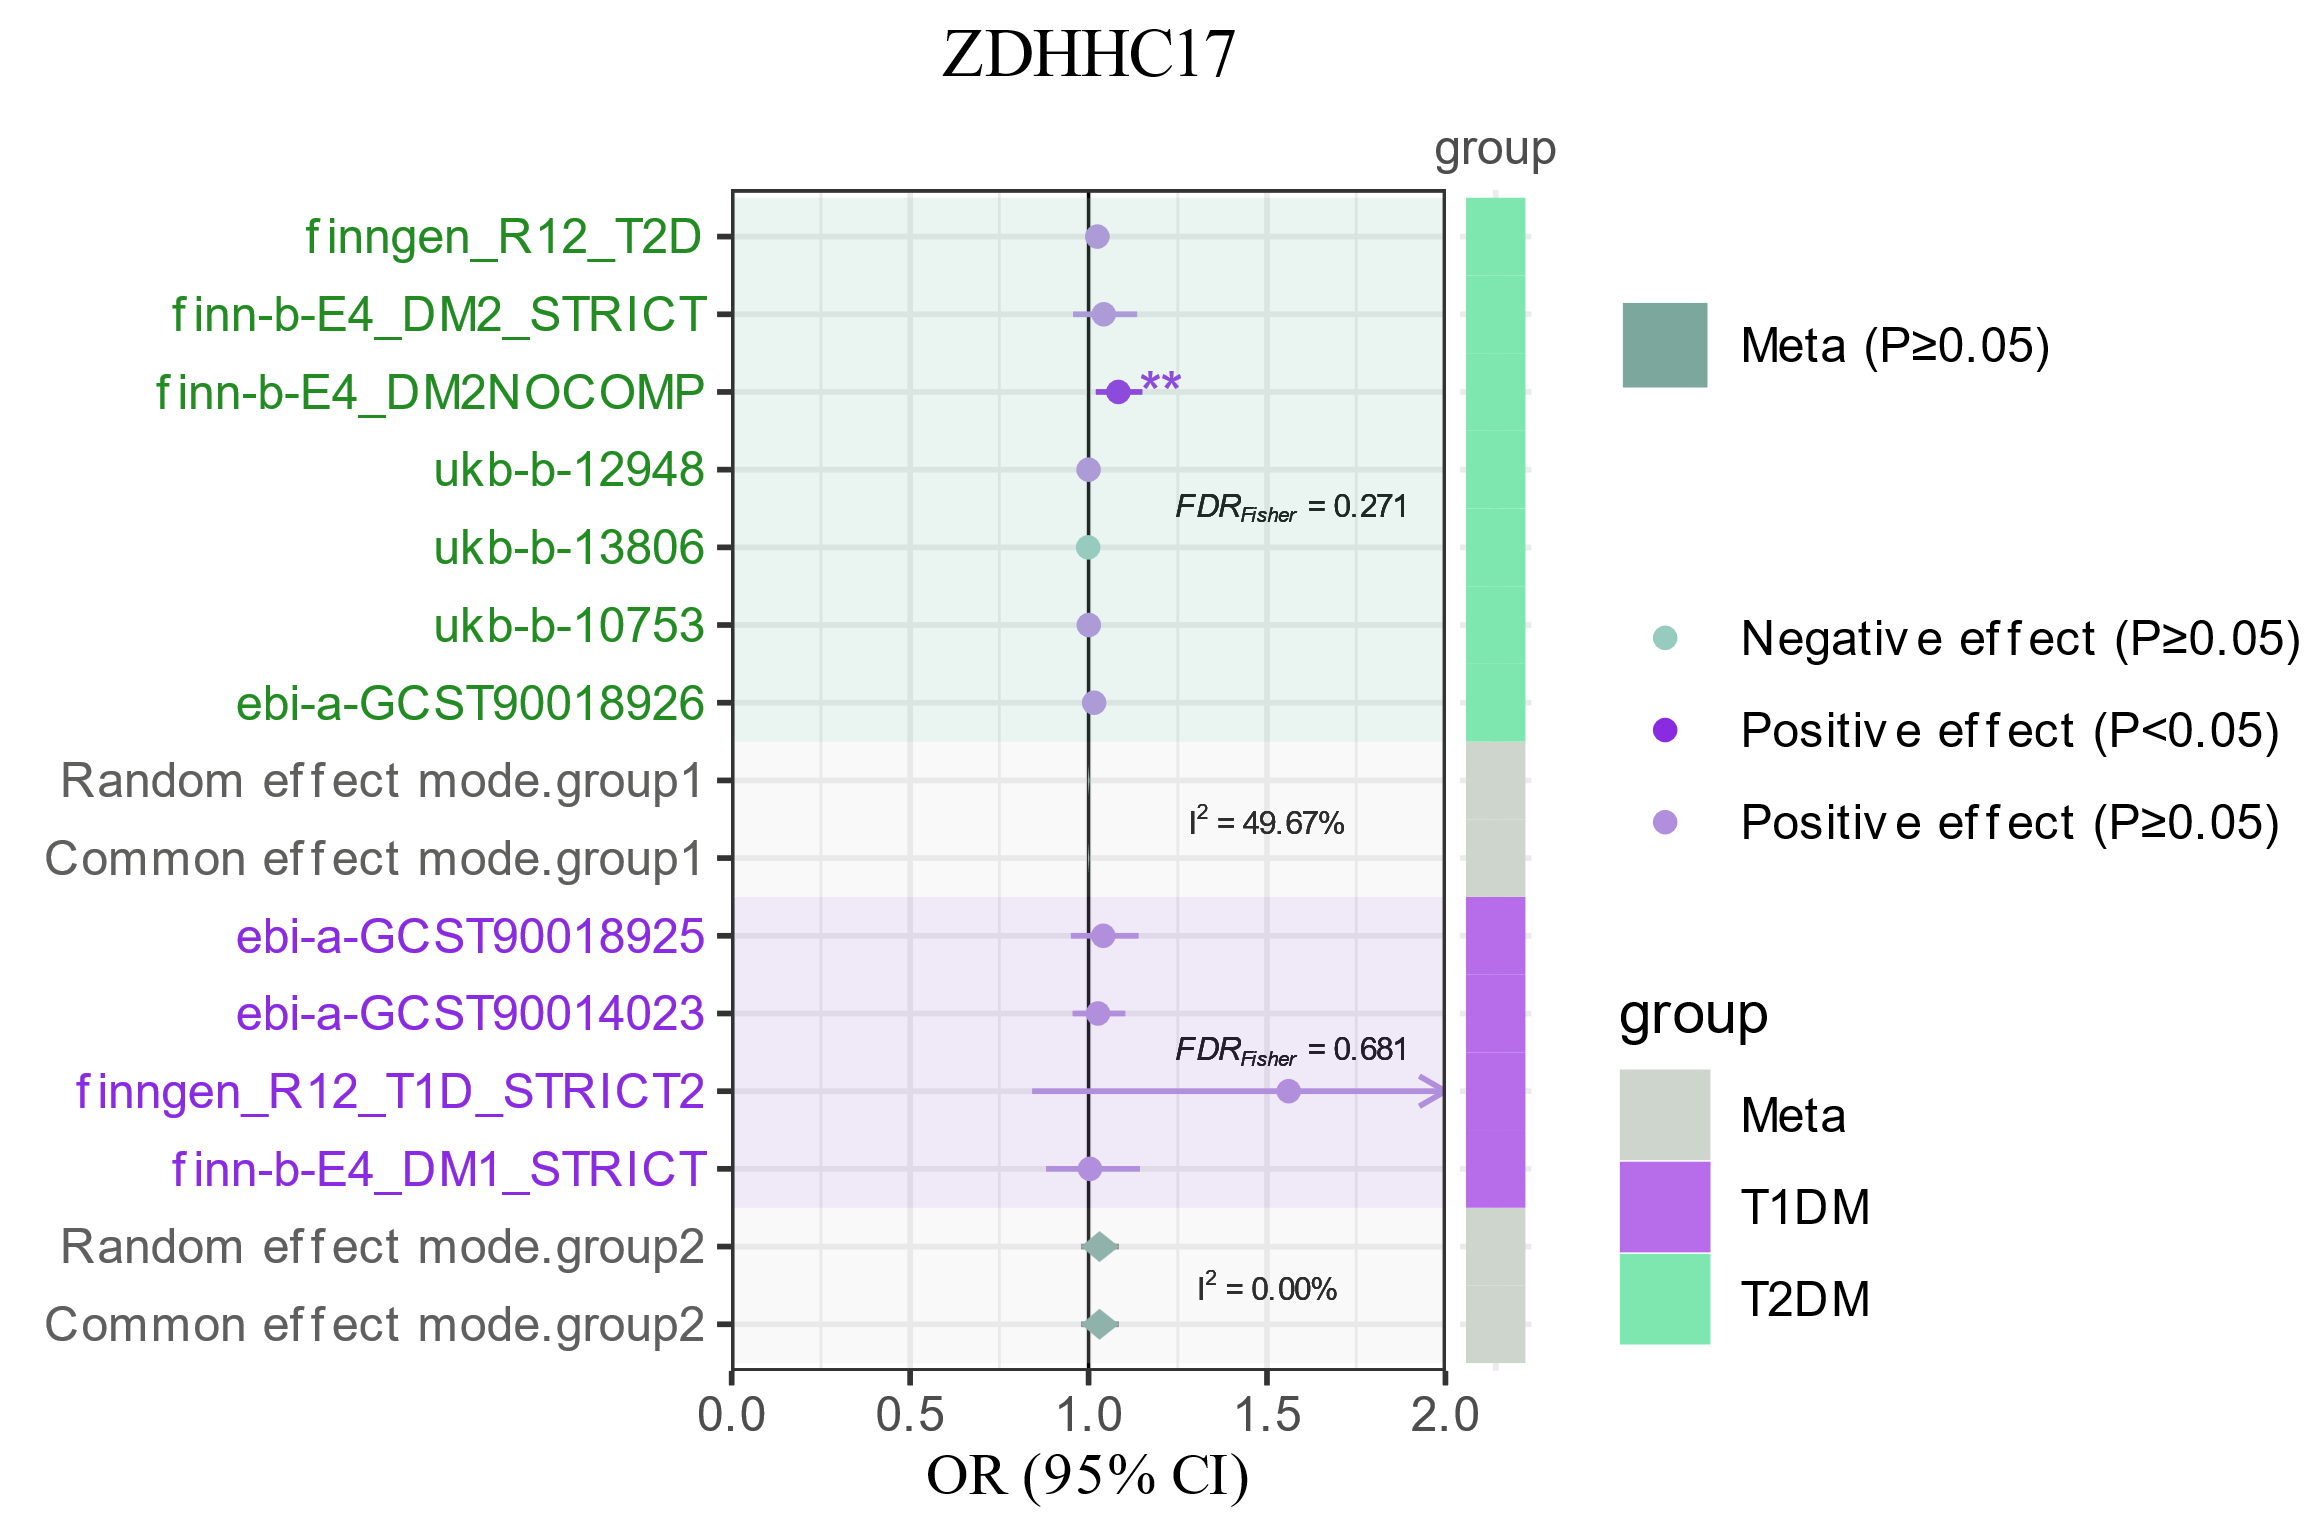

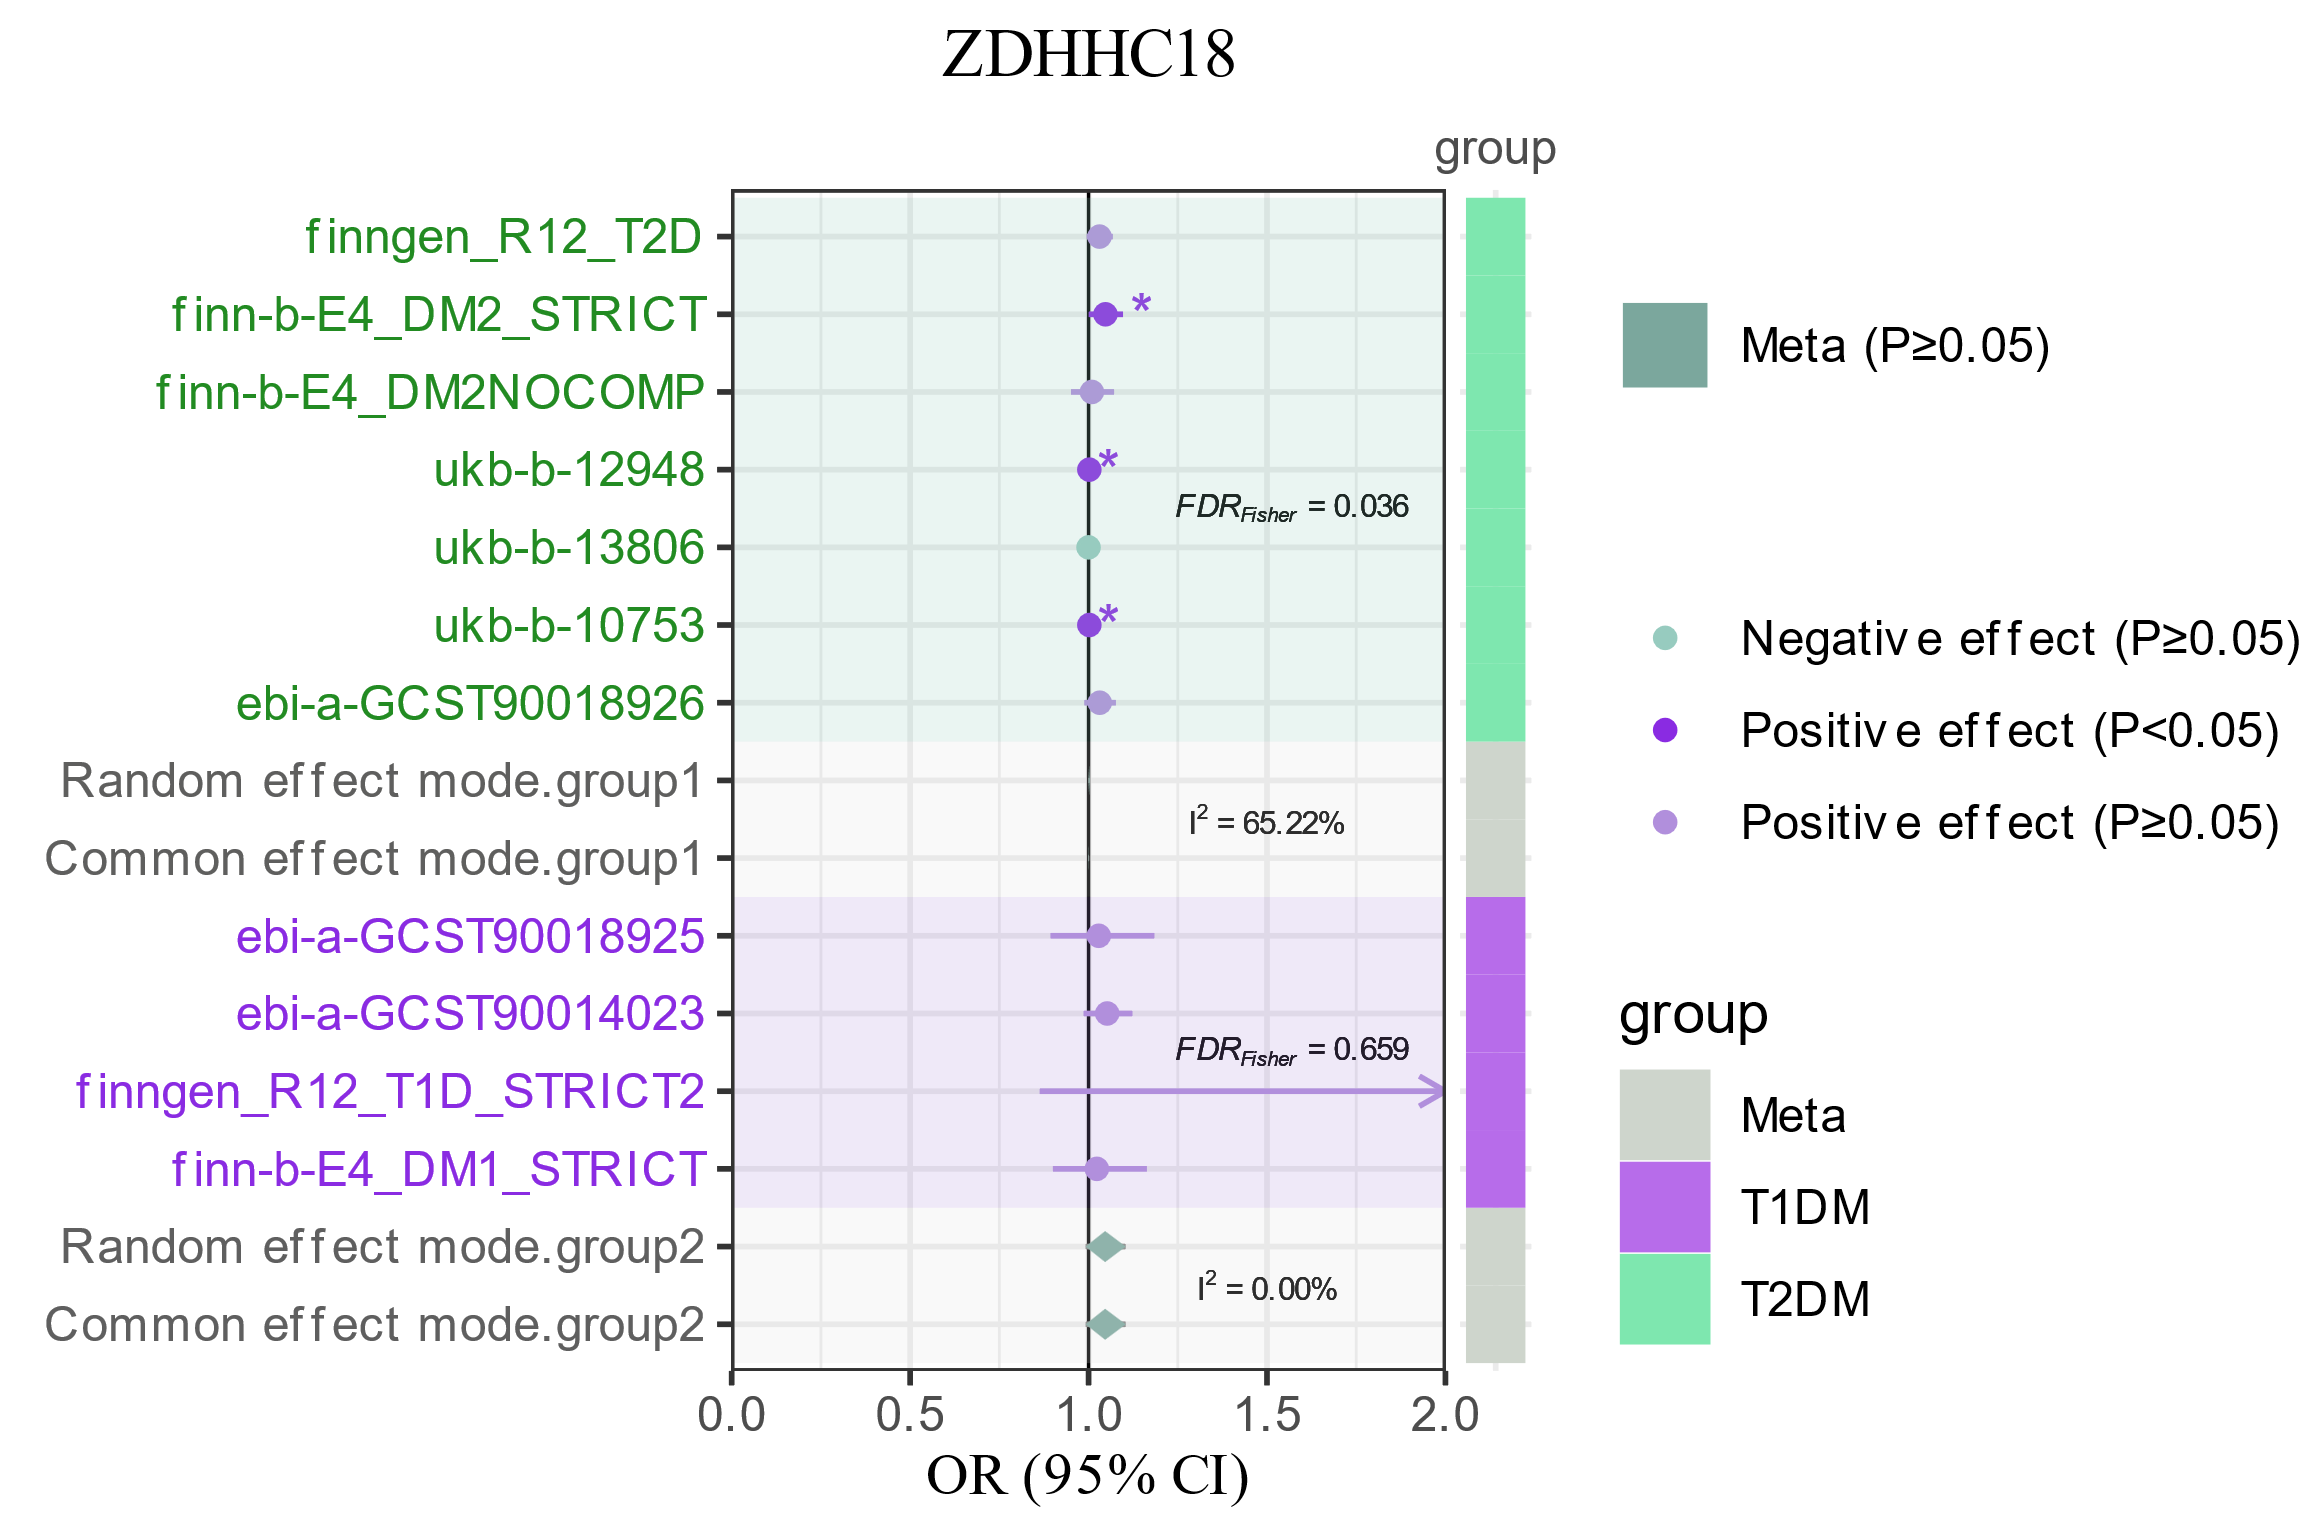

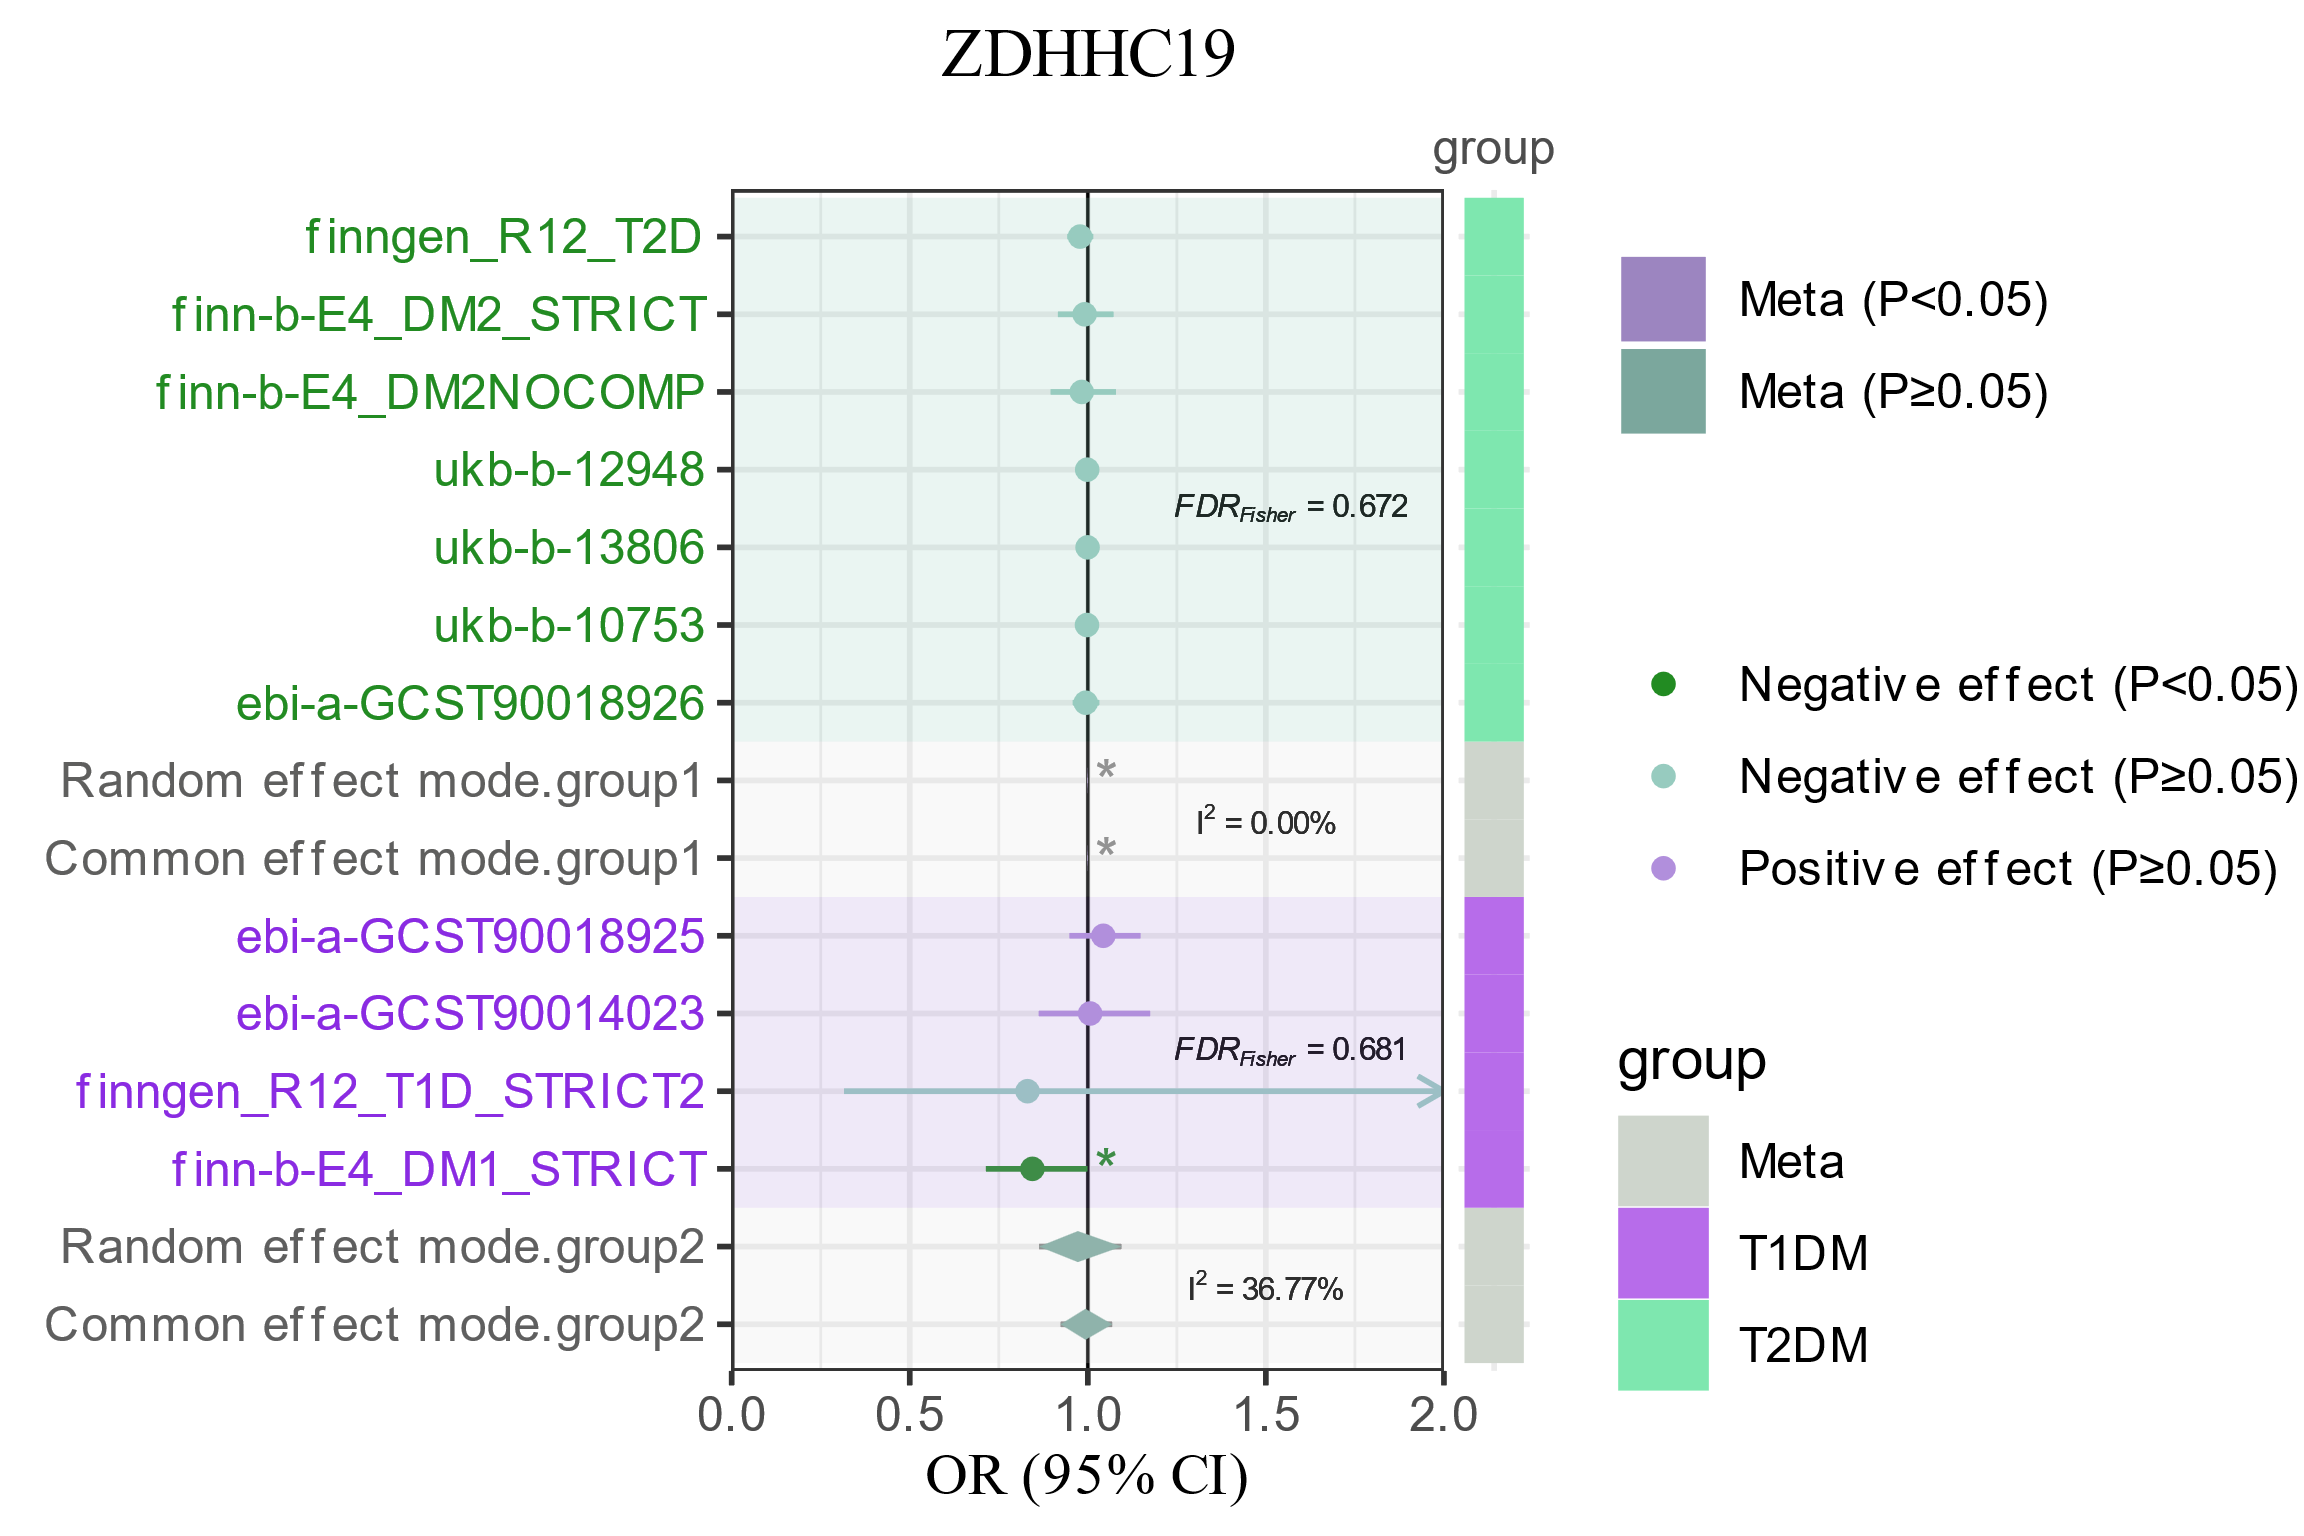

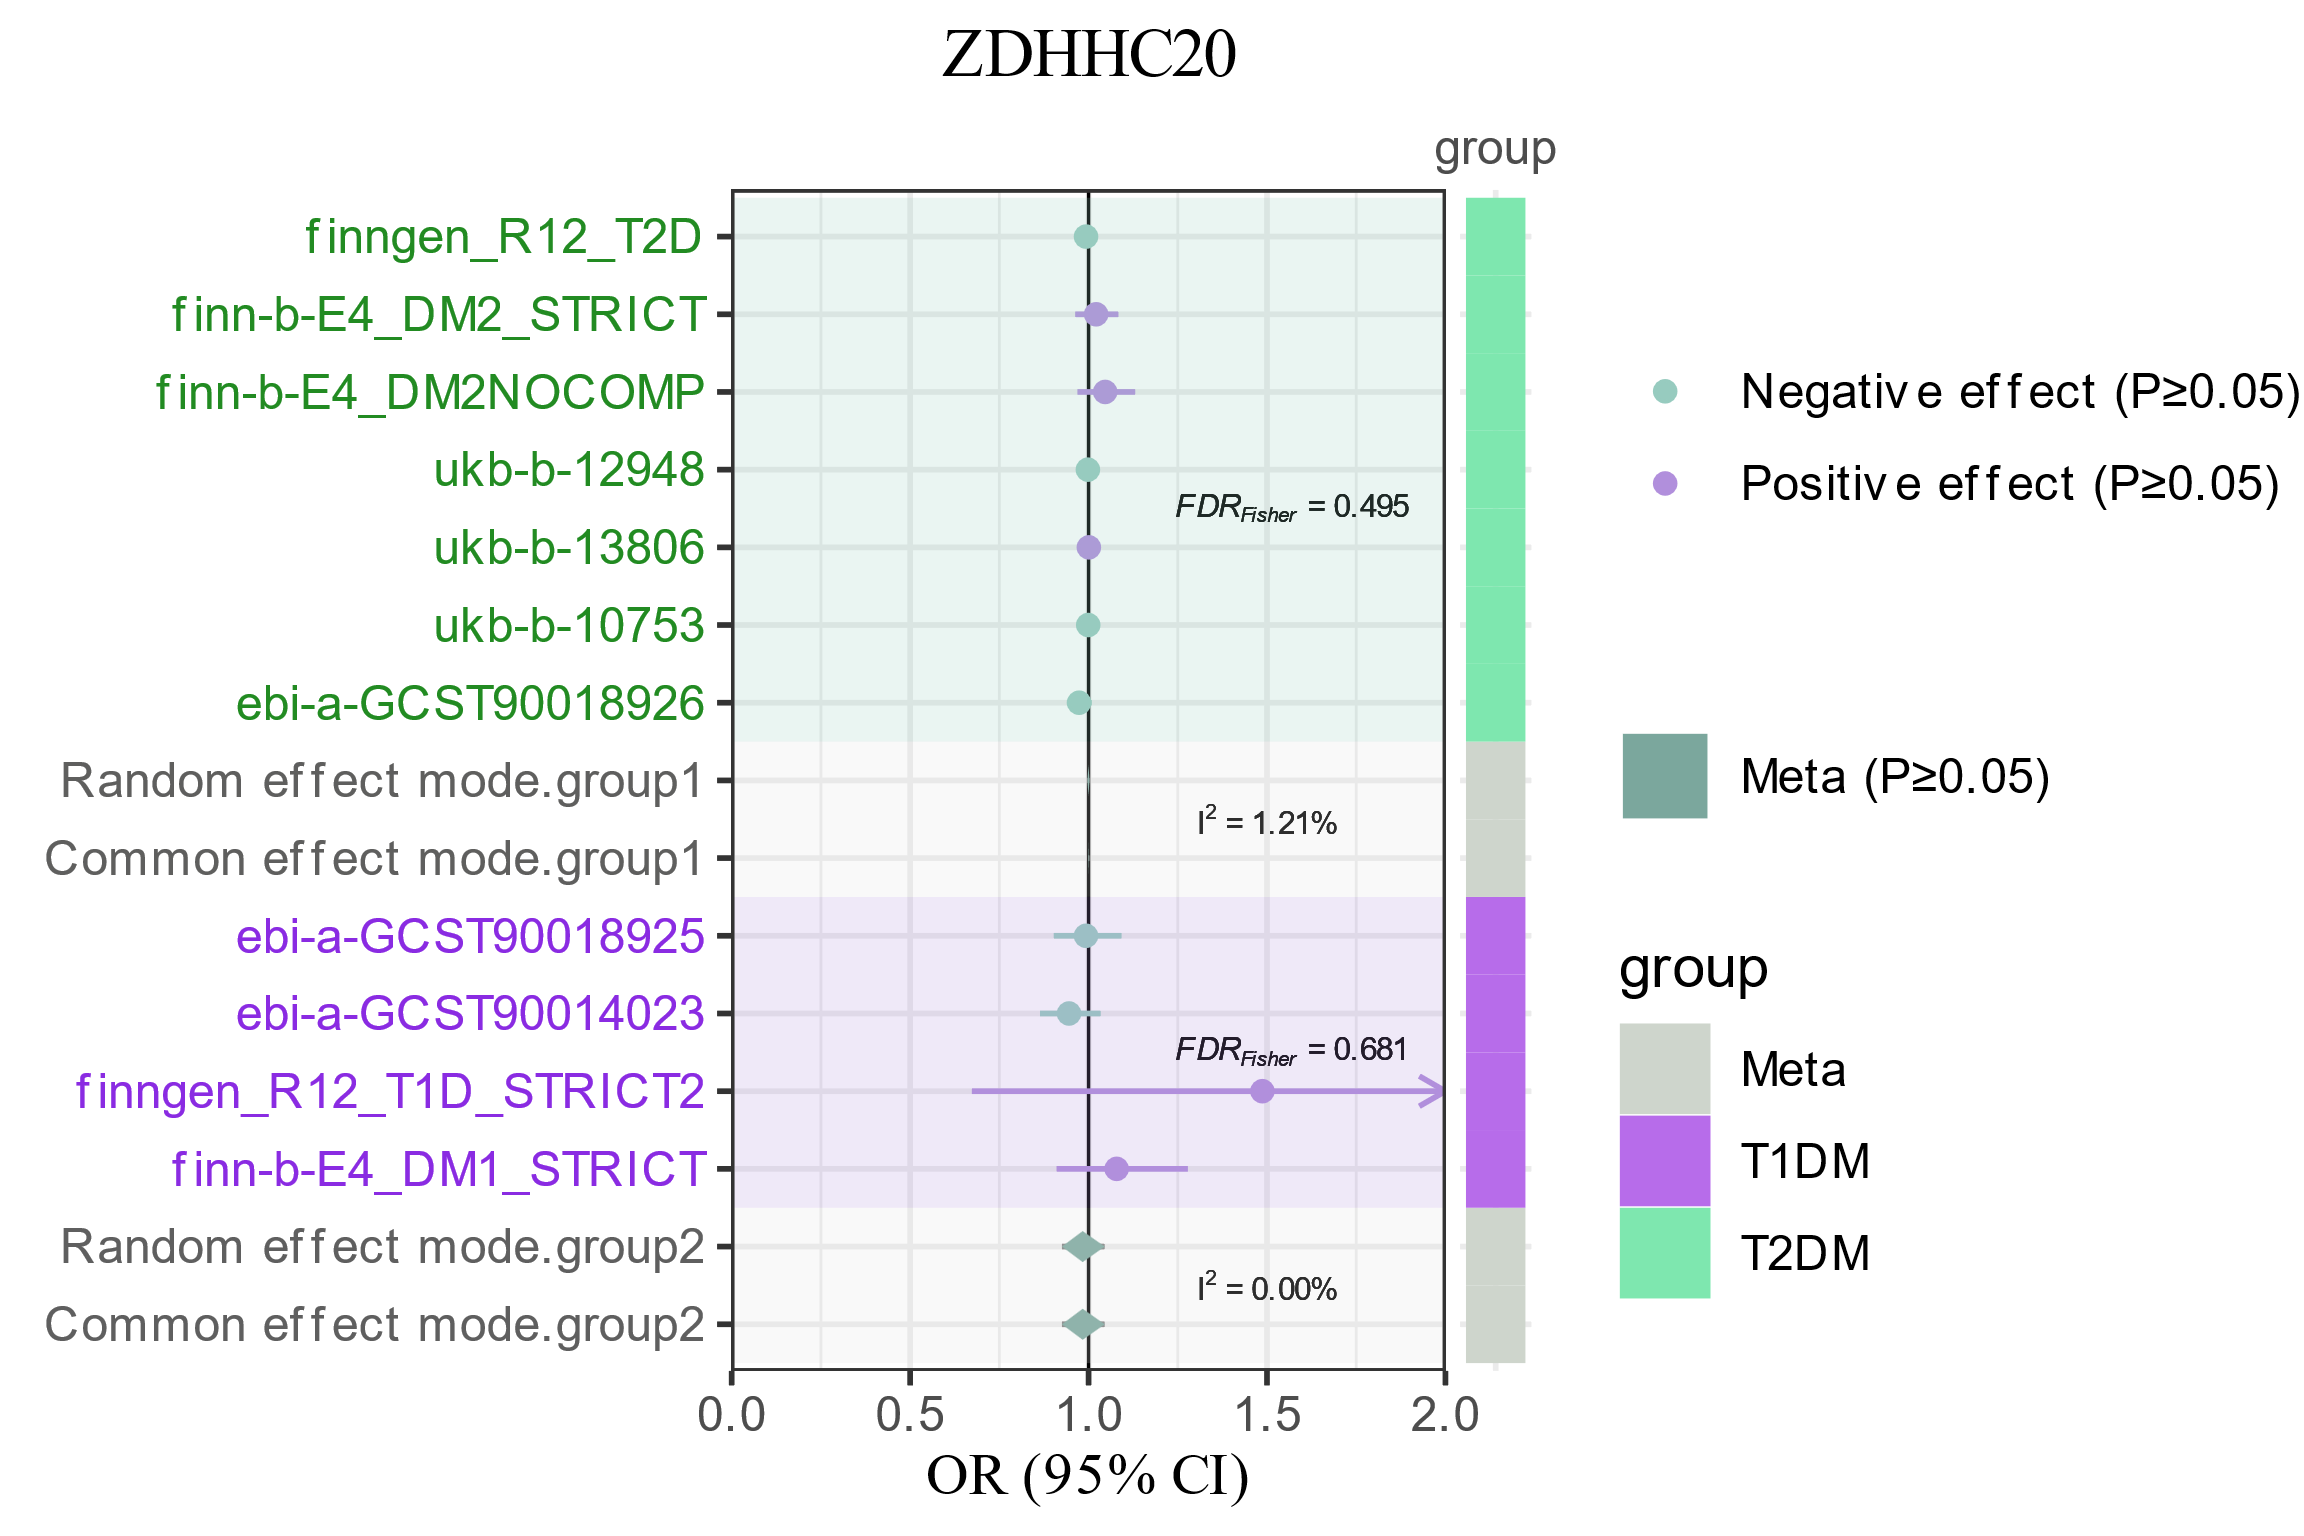

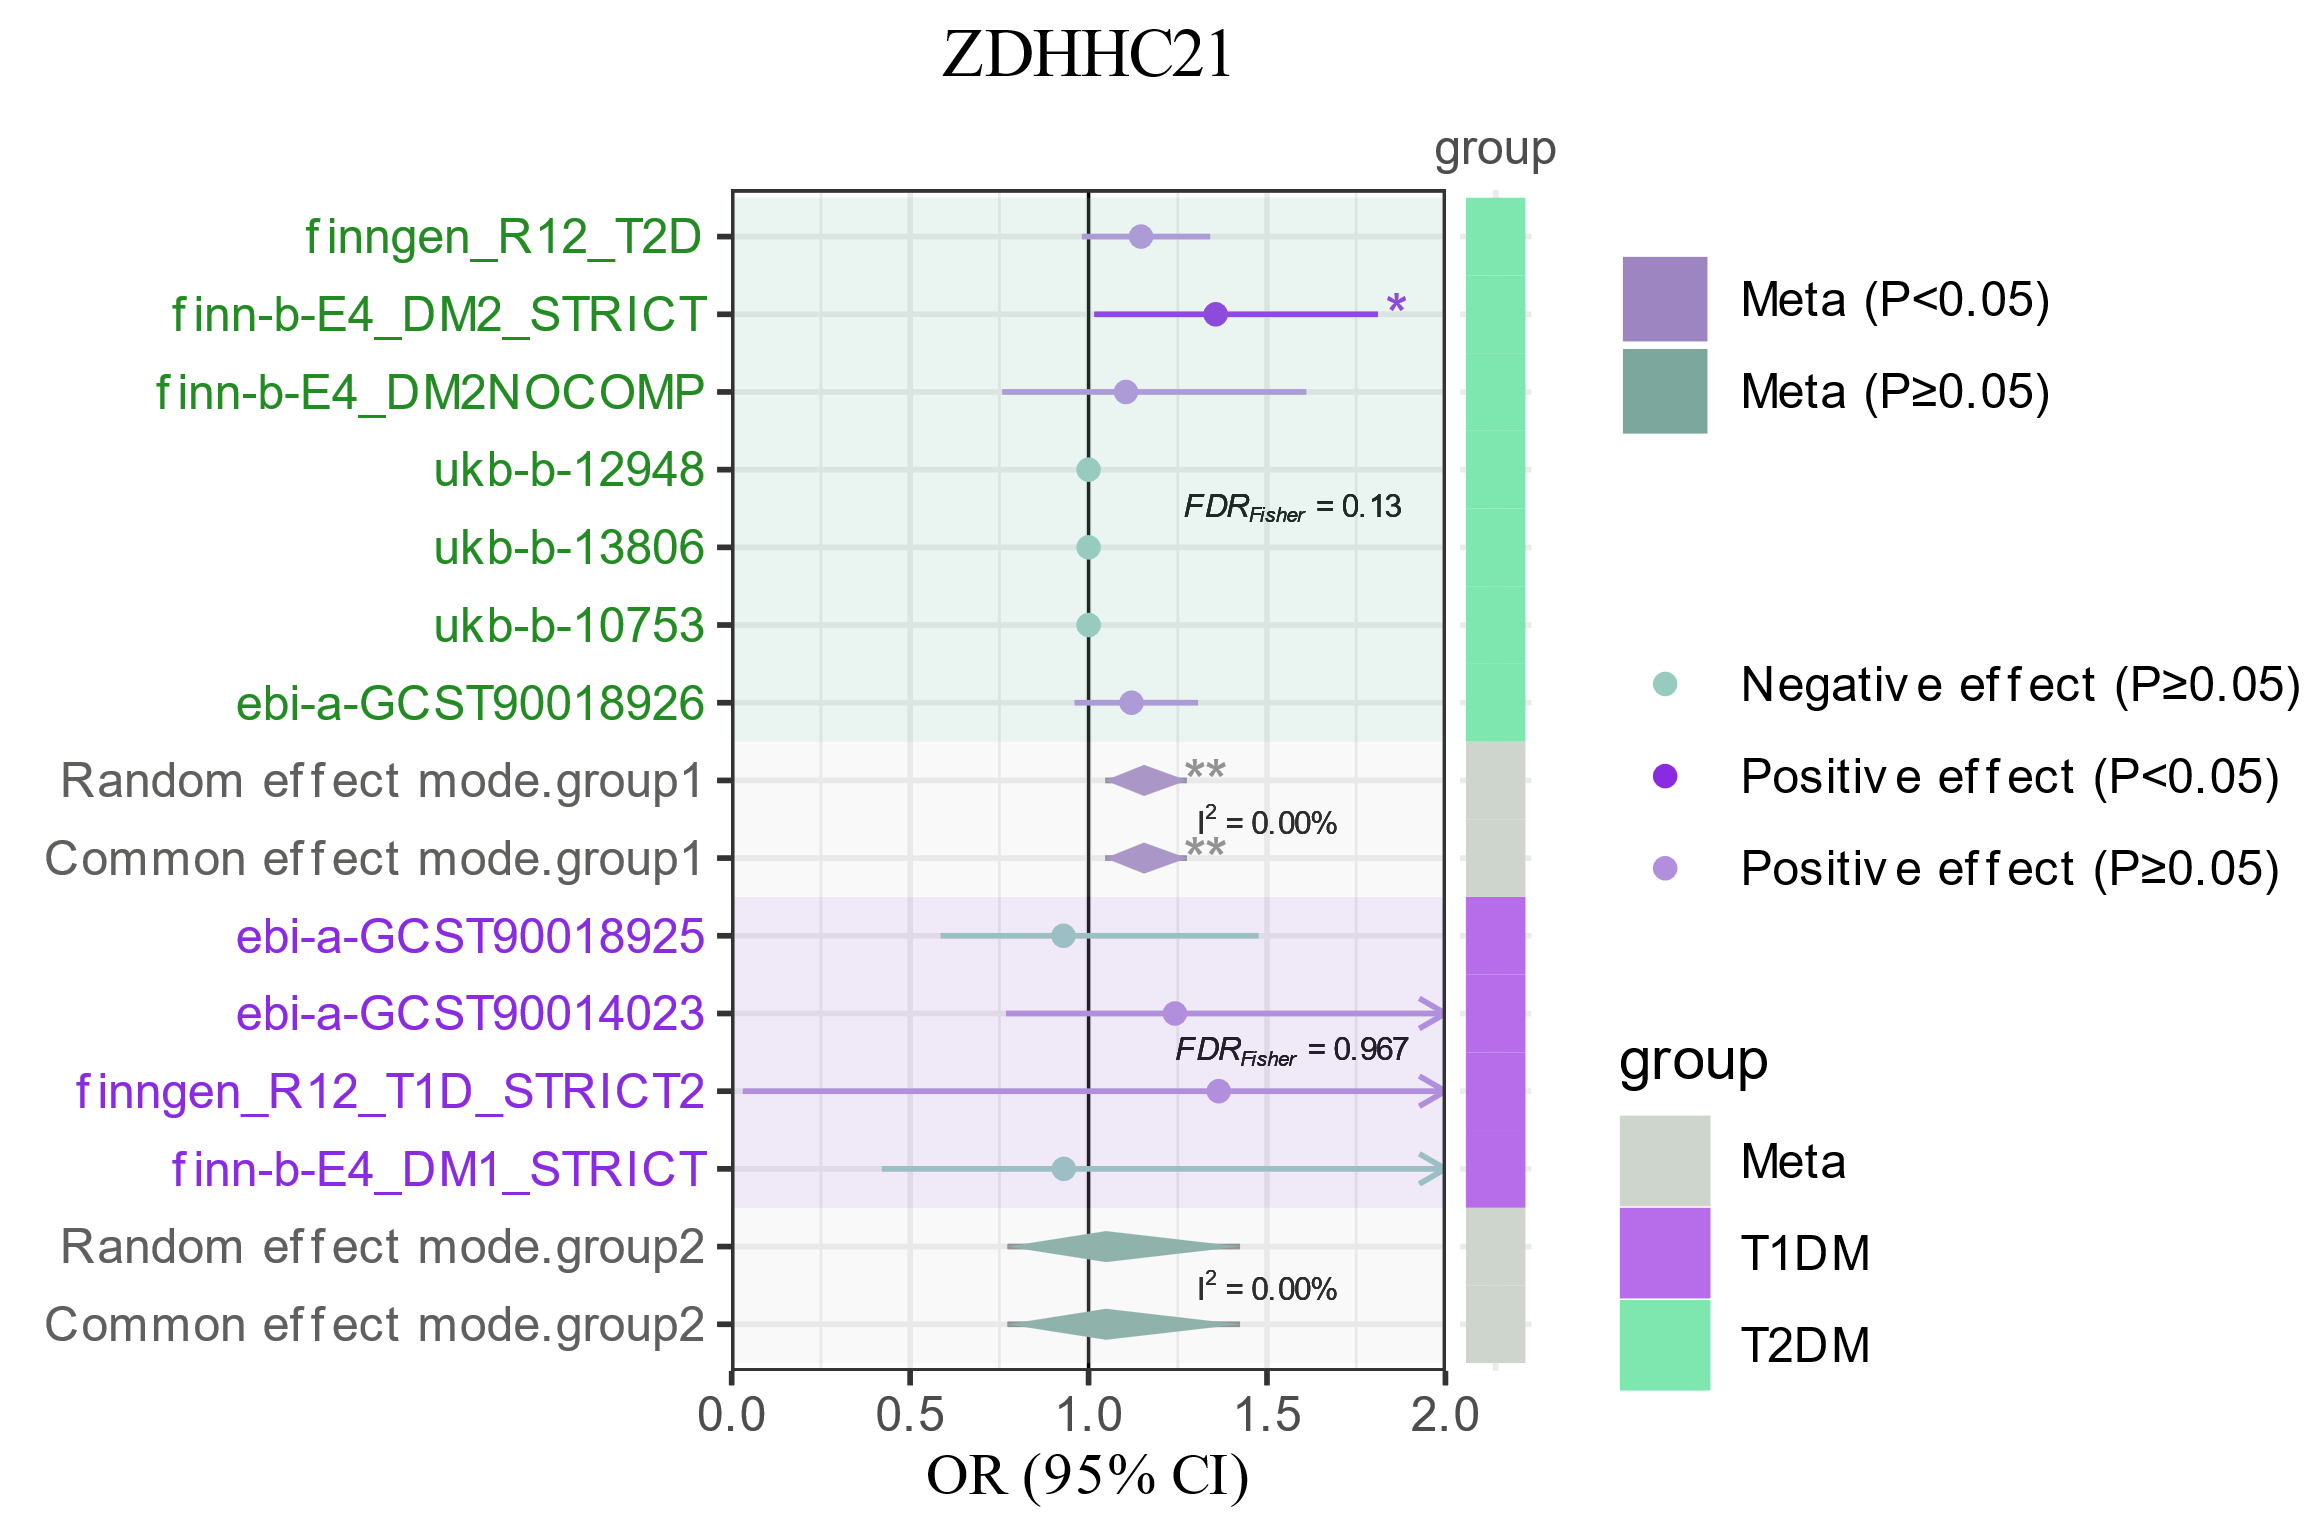

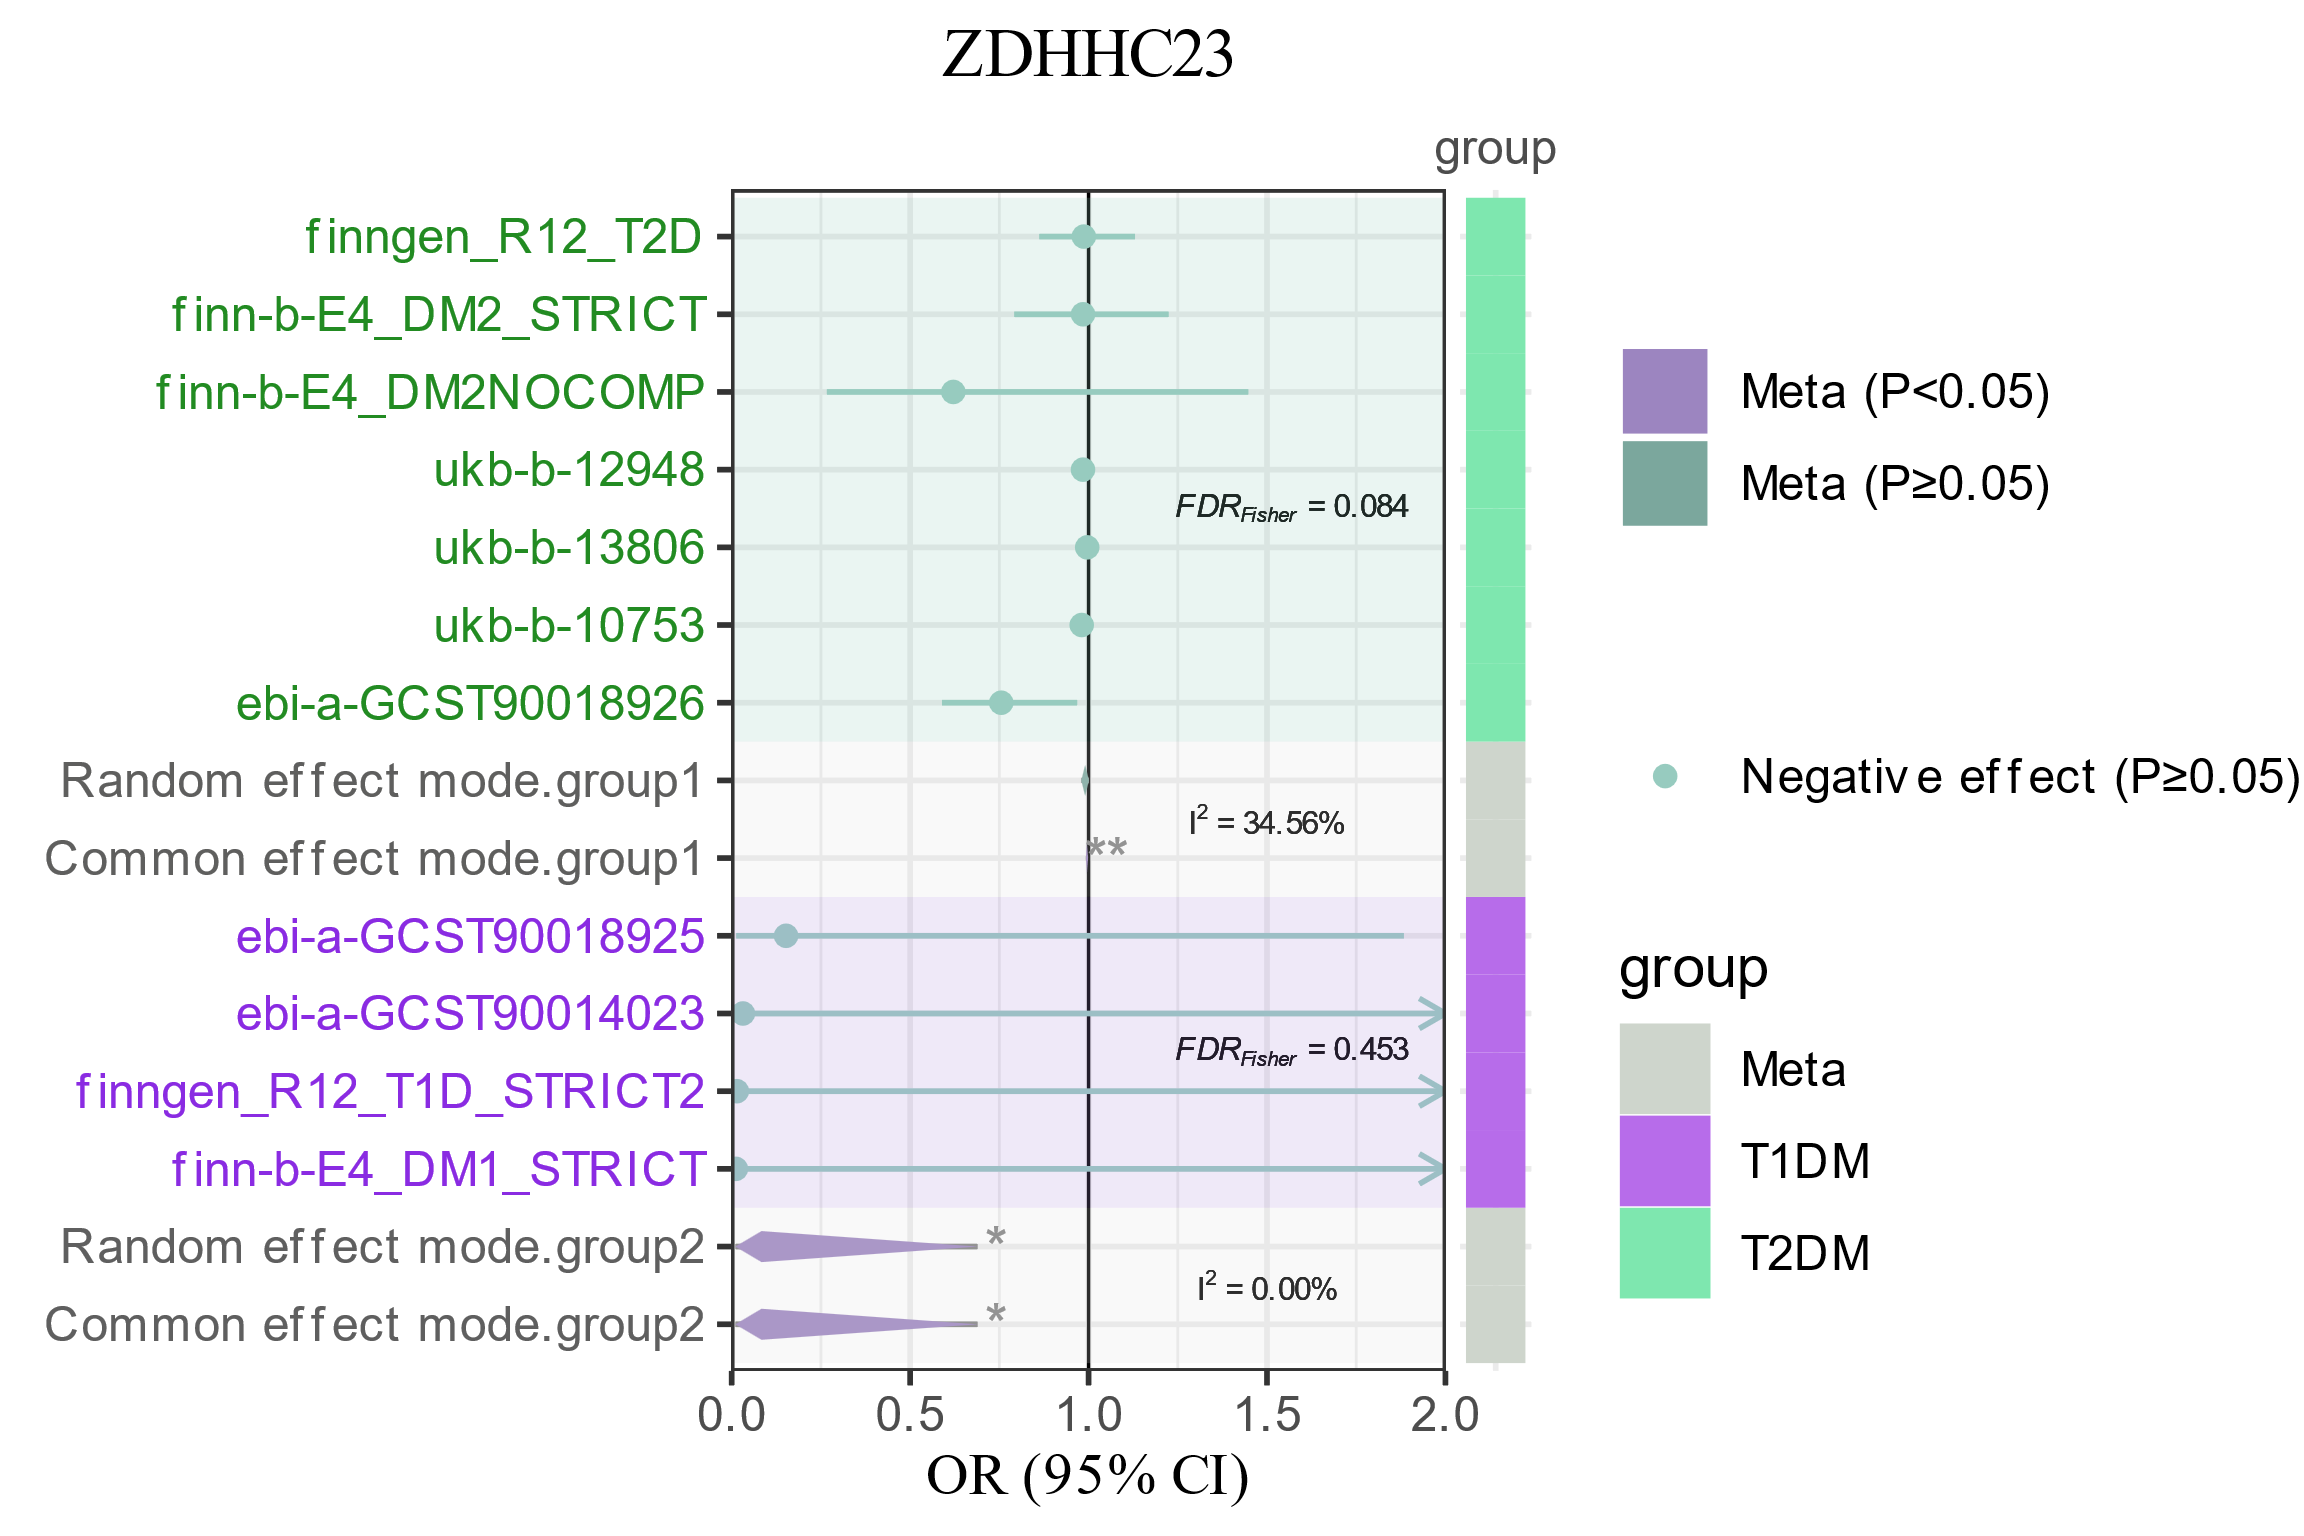


Supplement Figure 2. Visualization of eQTL-GWAS colocalization by locuscompare plot.


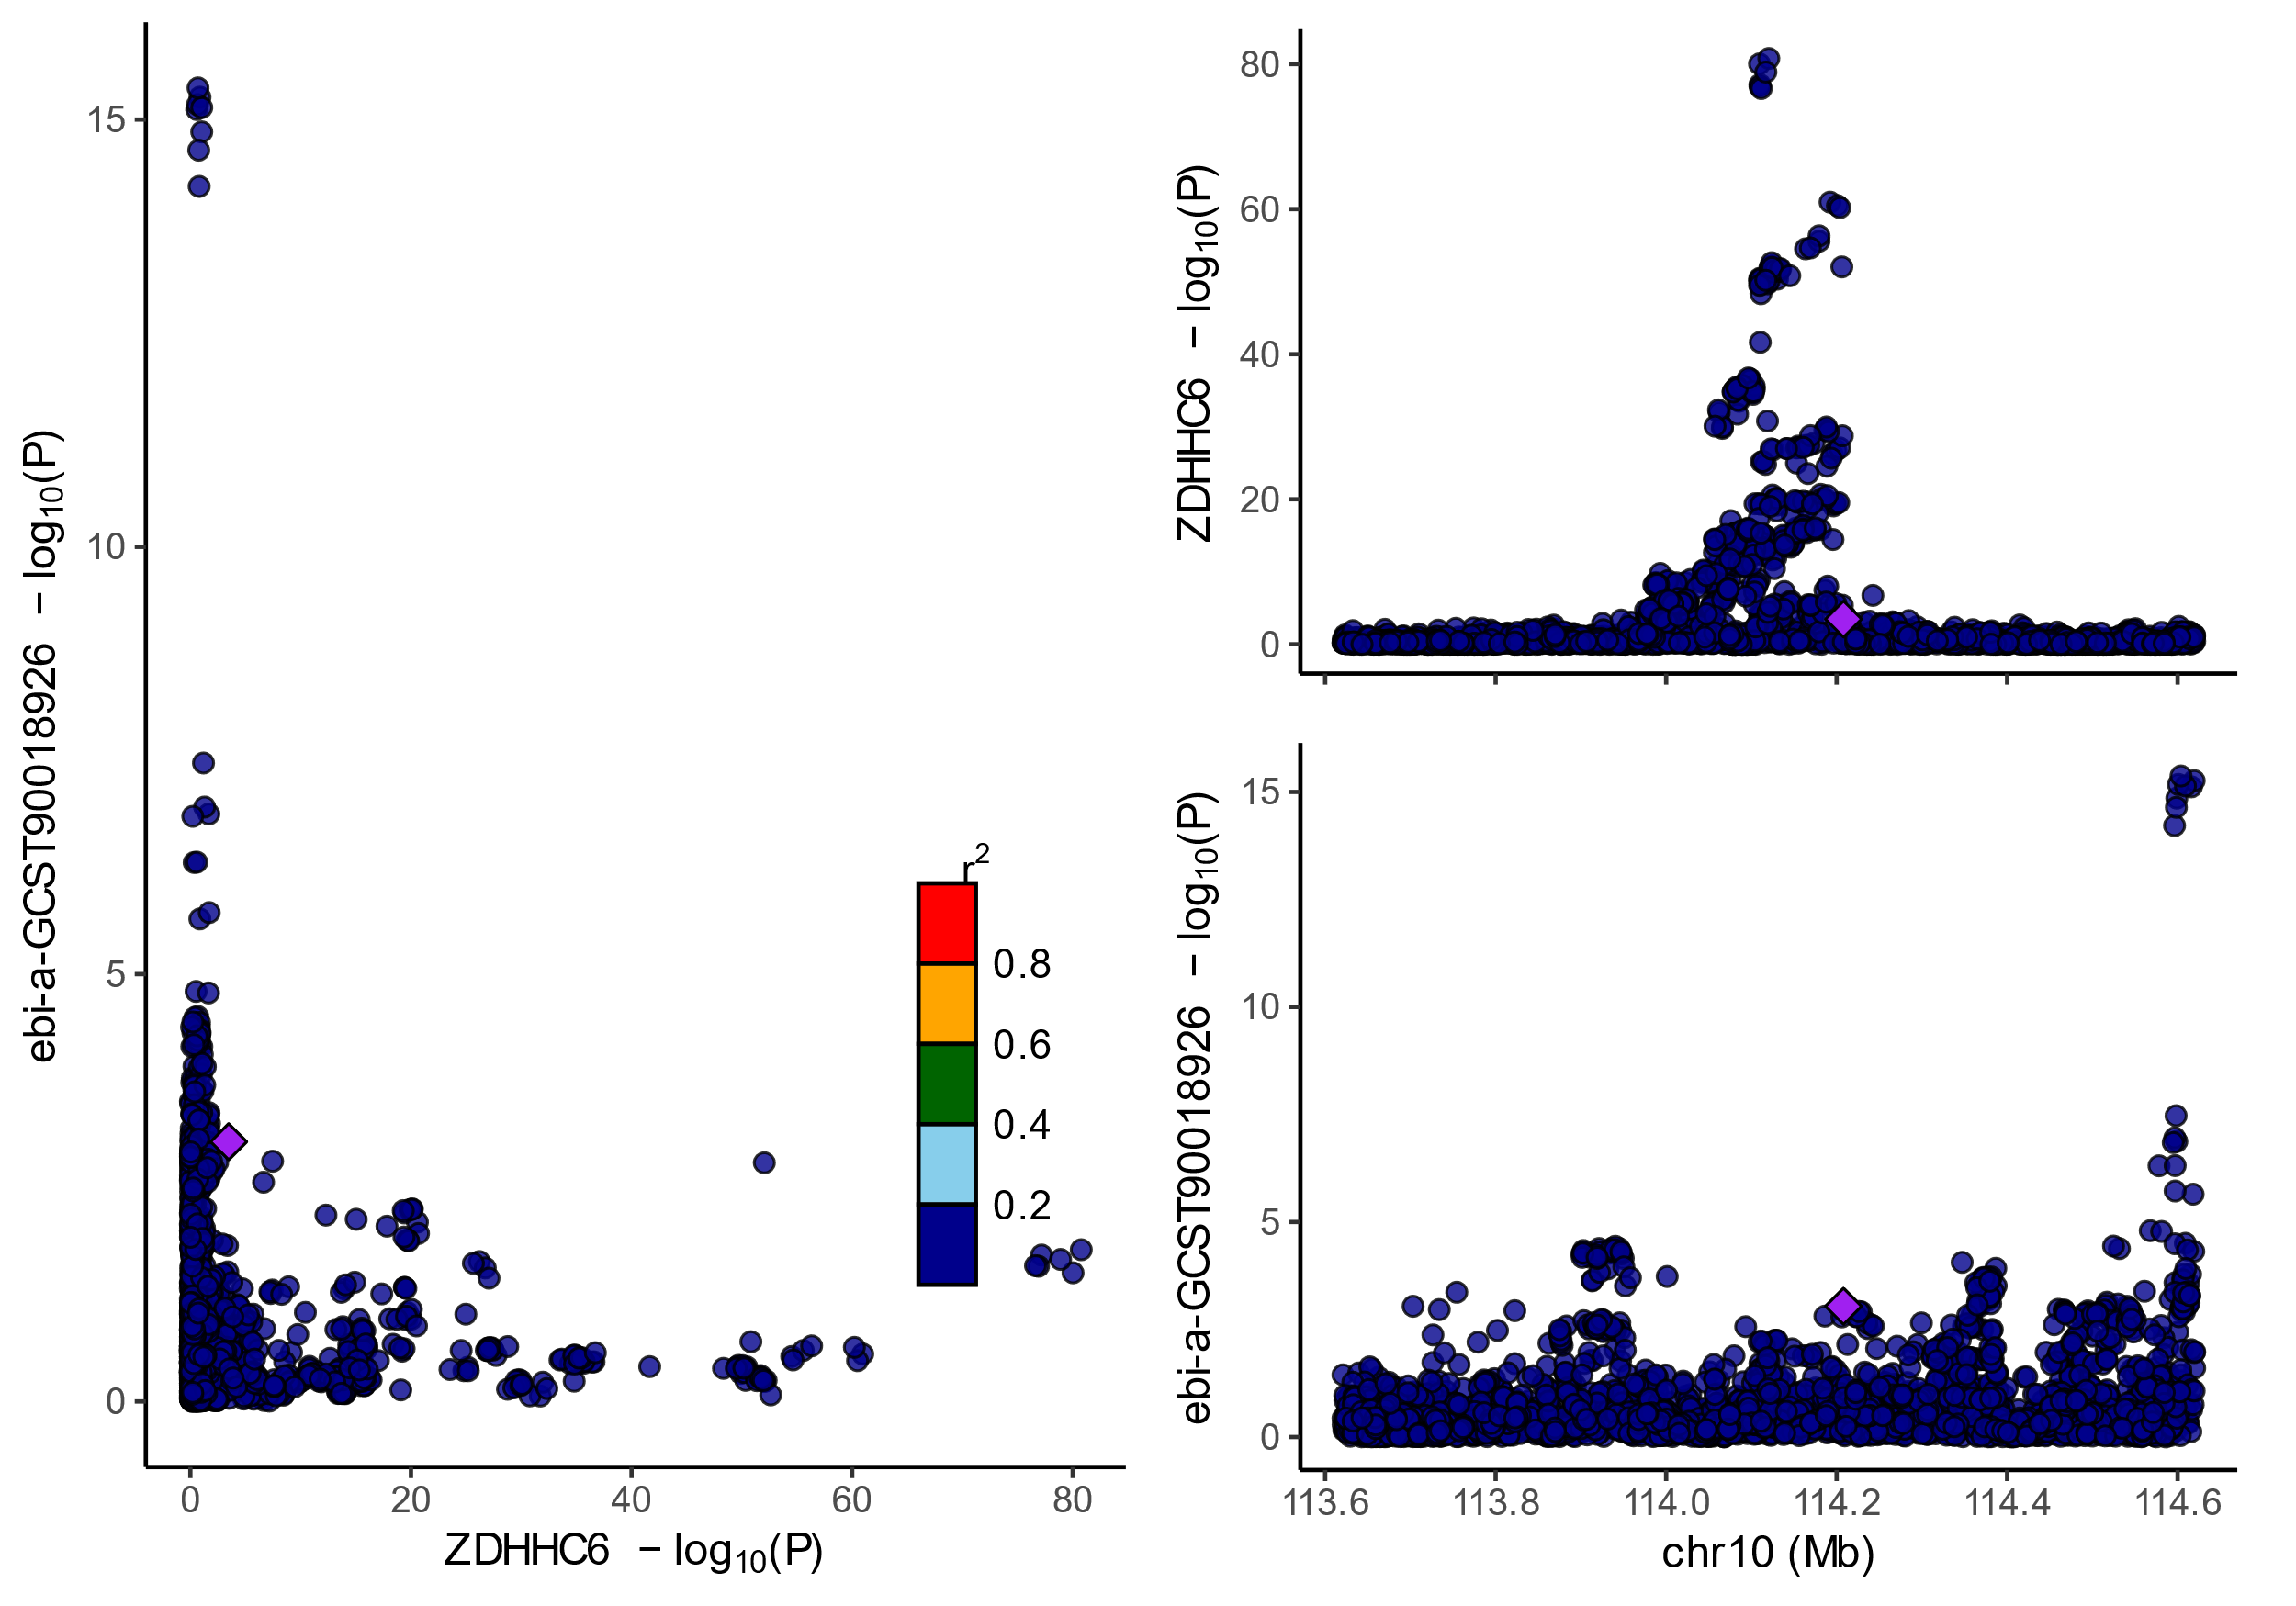

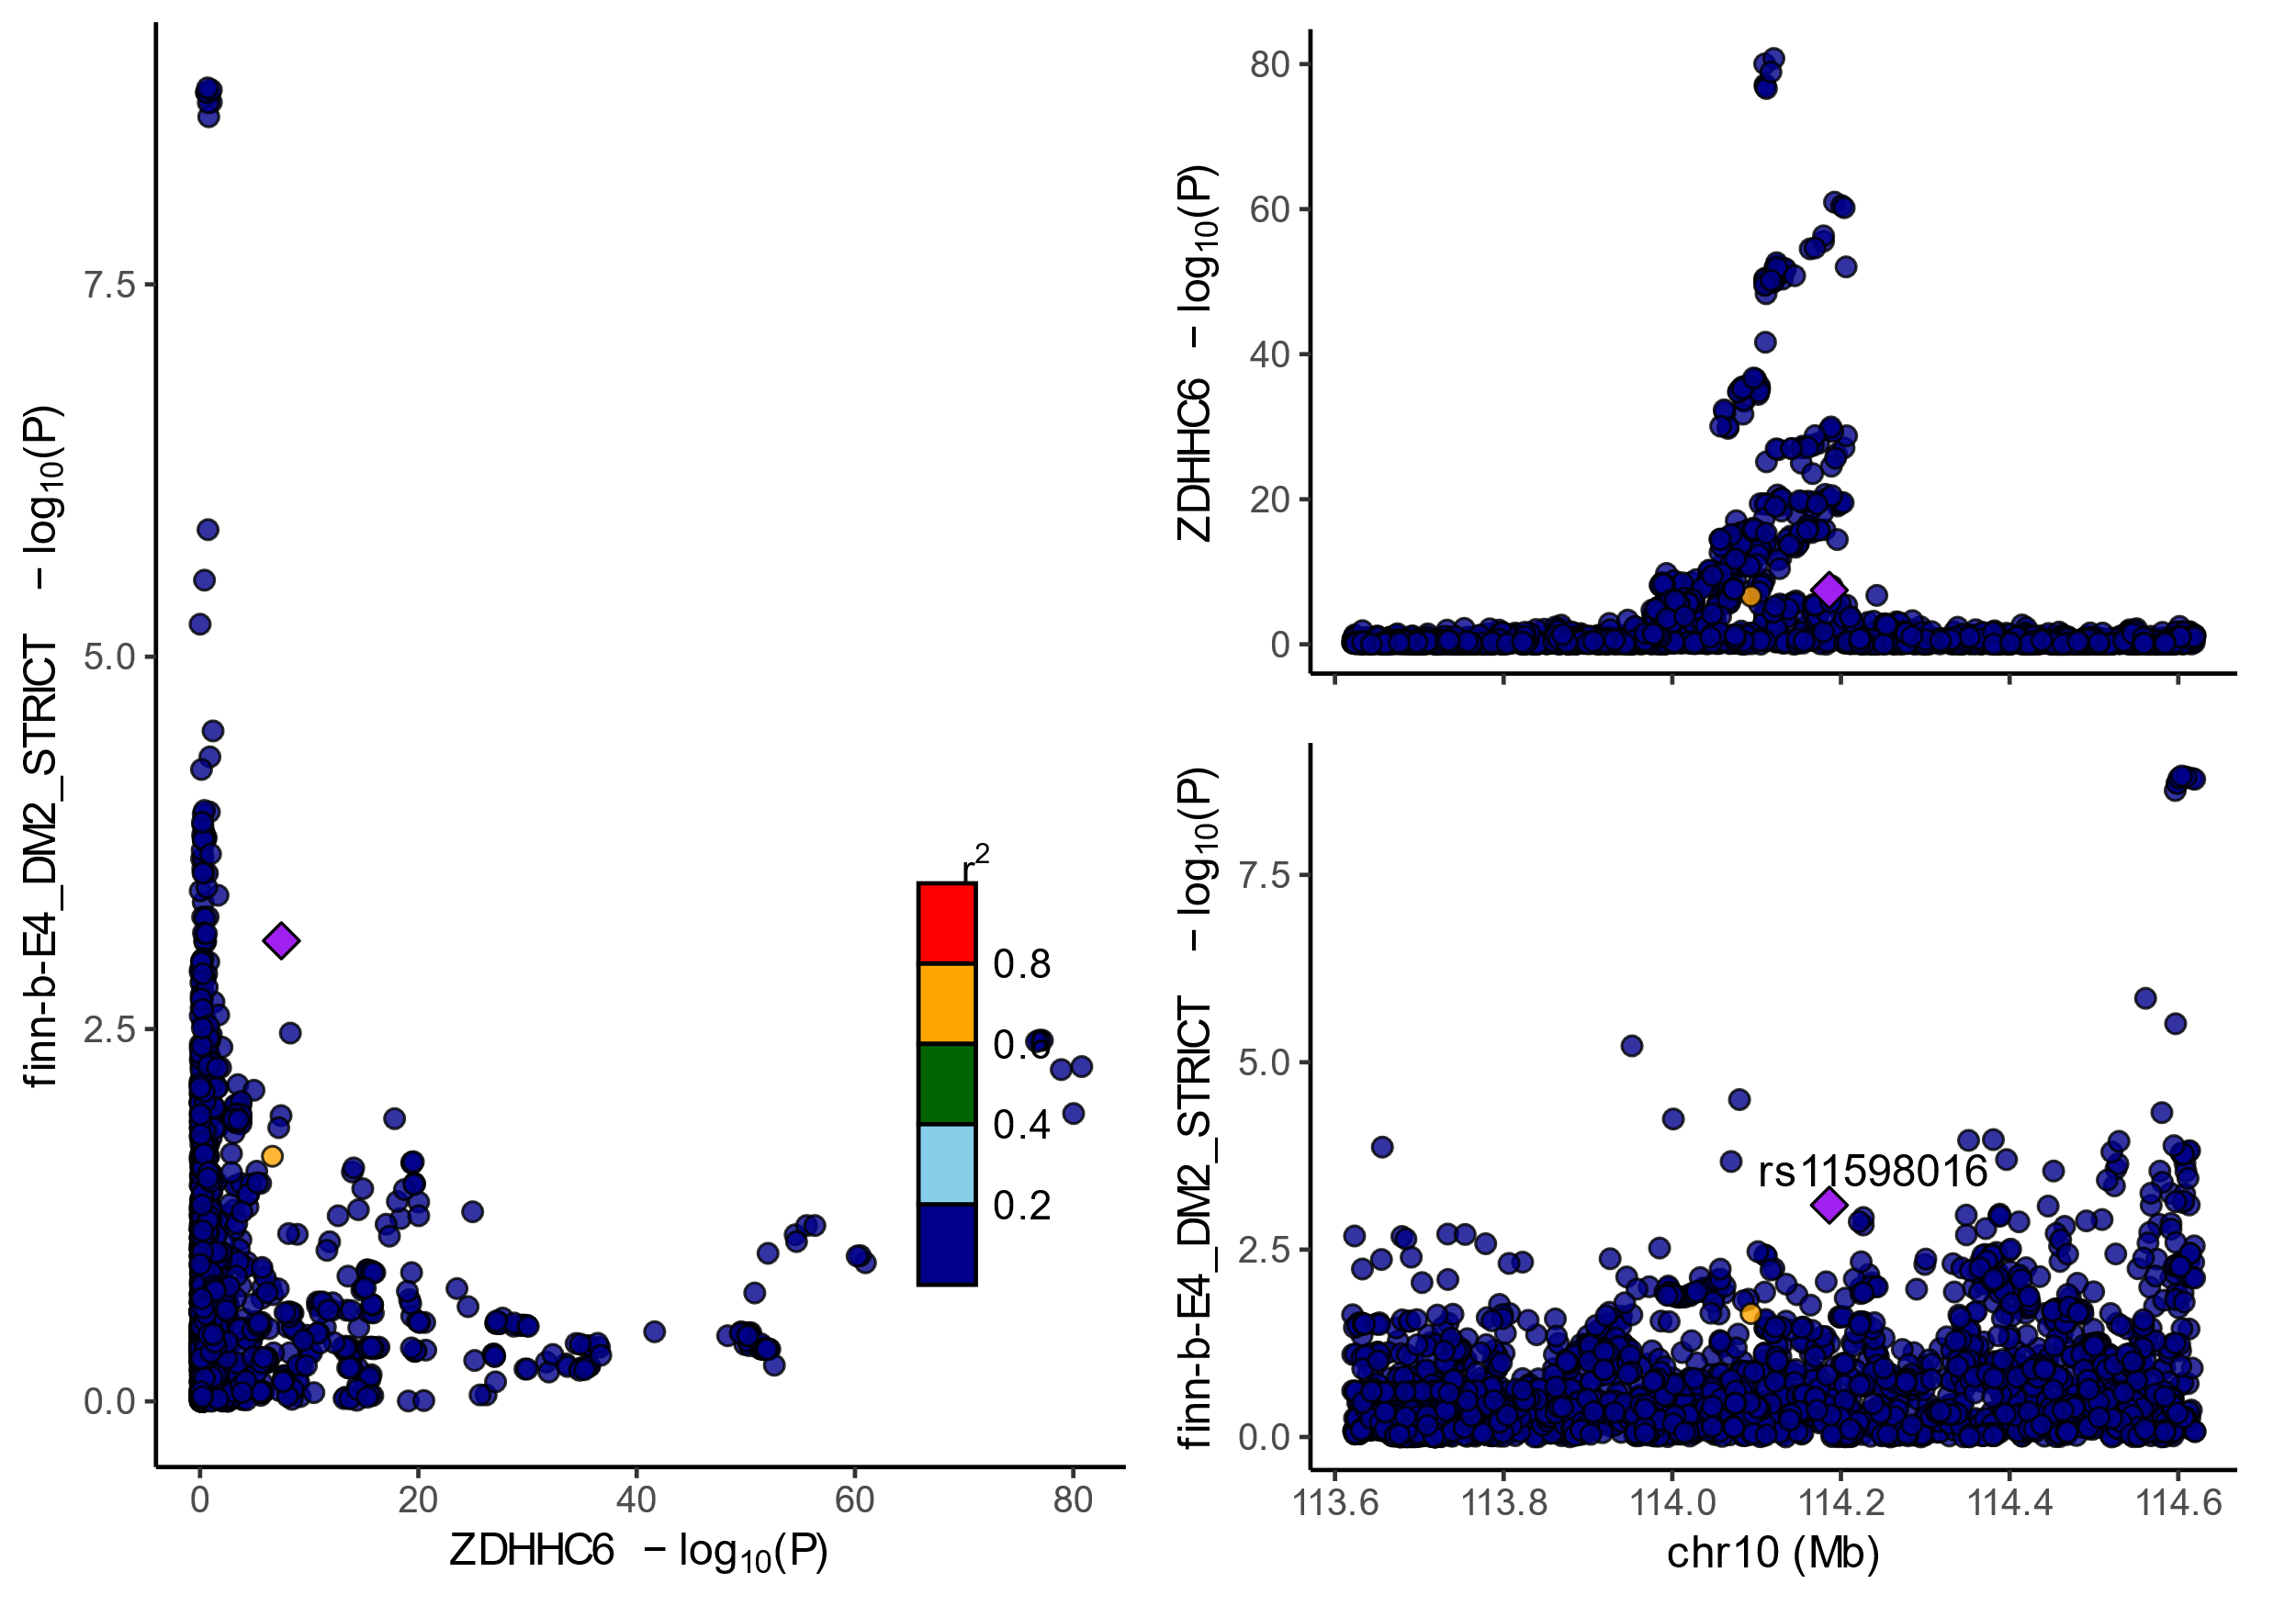

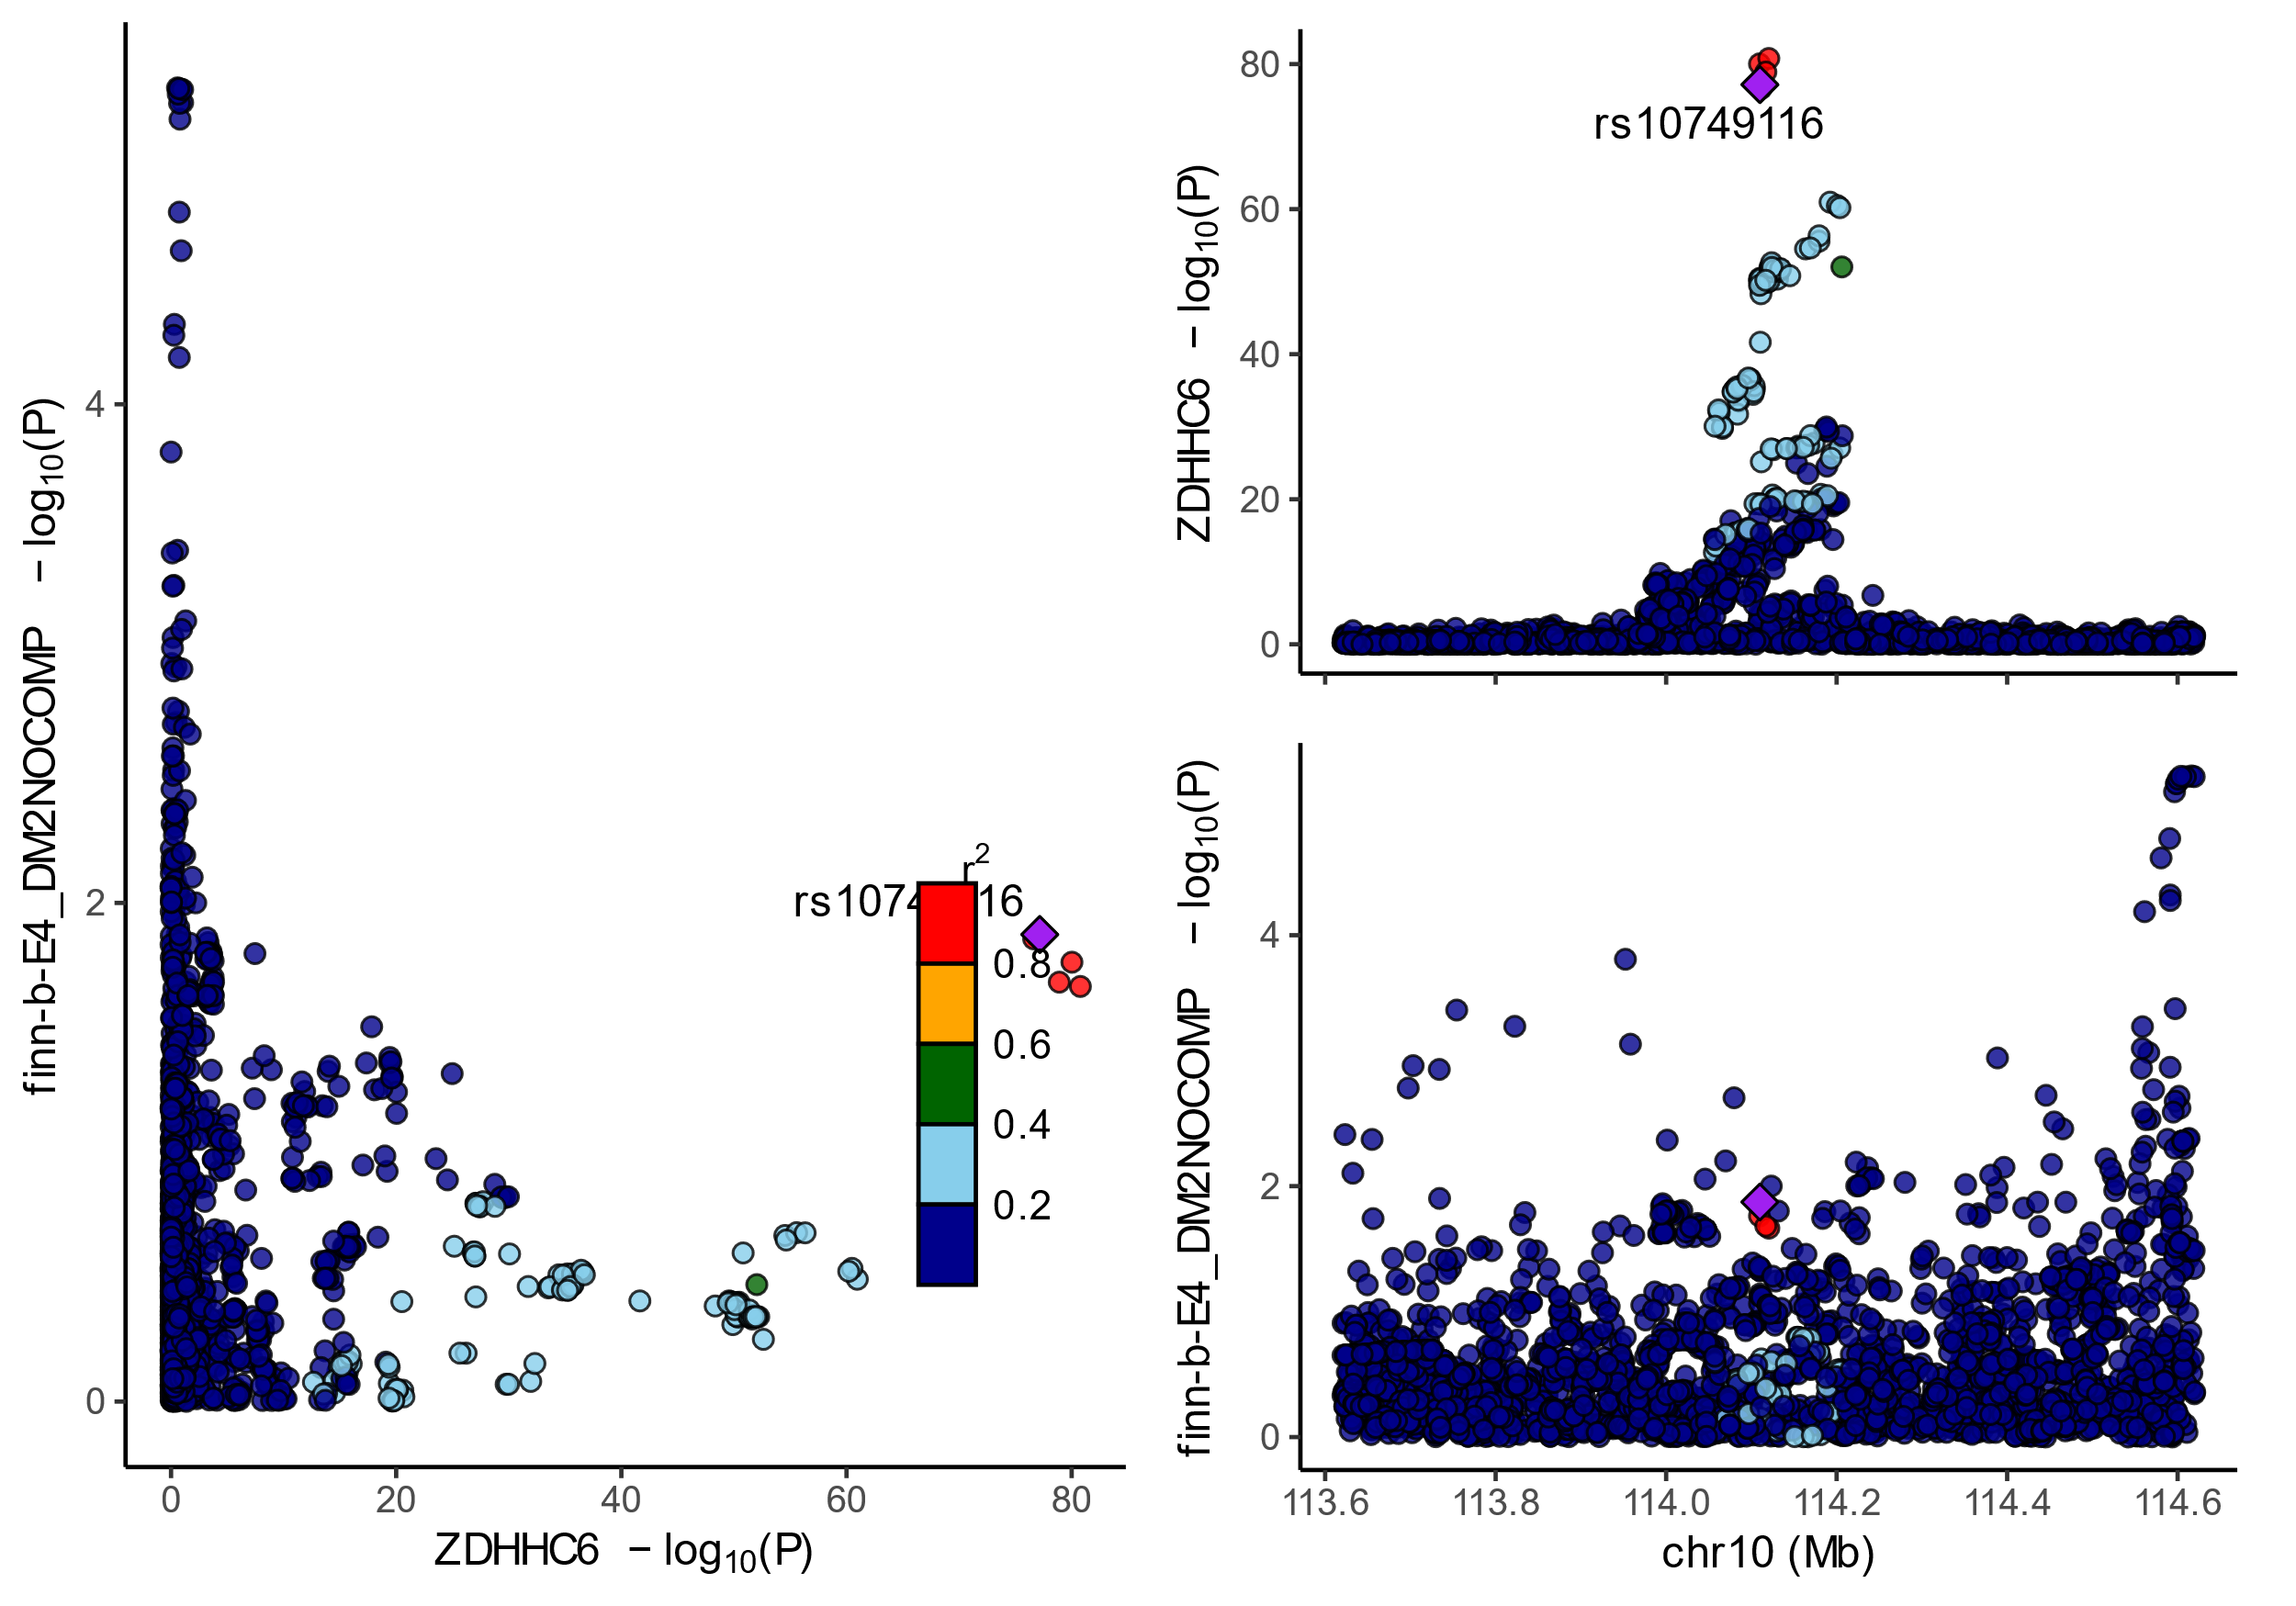

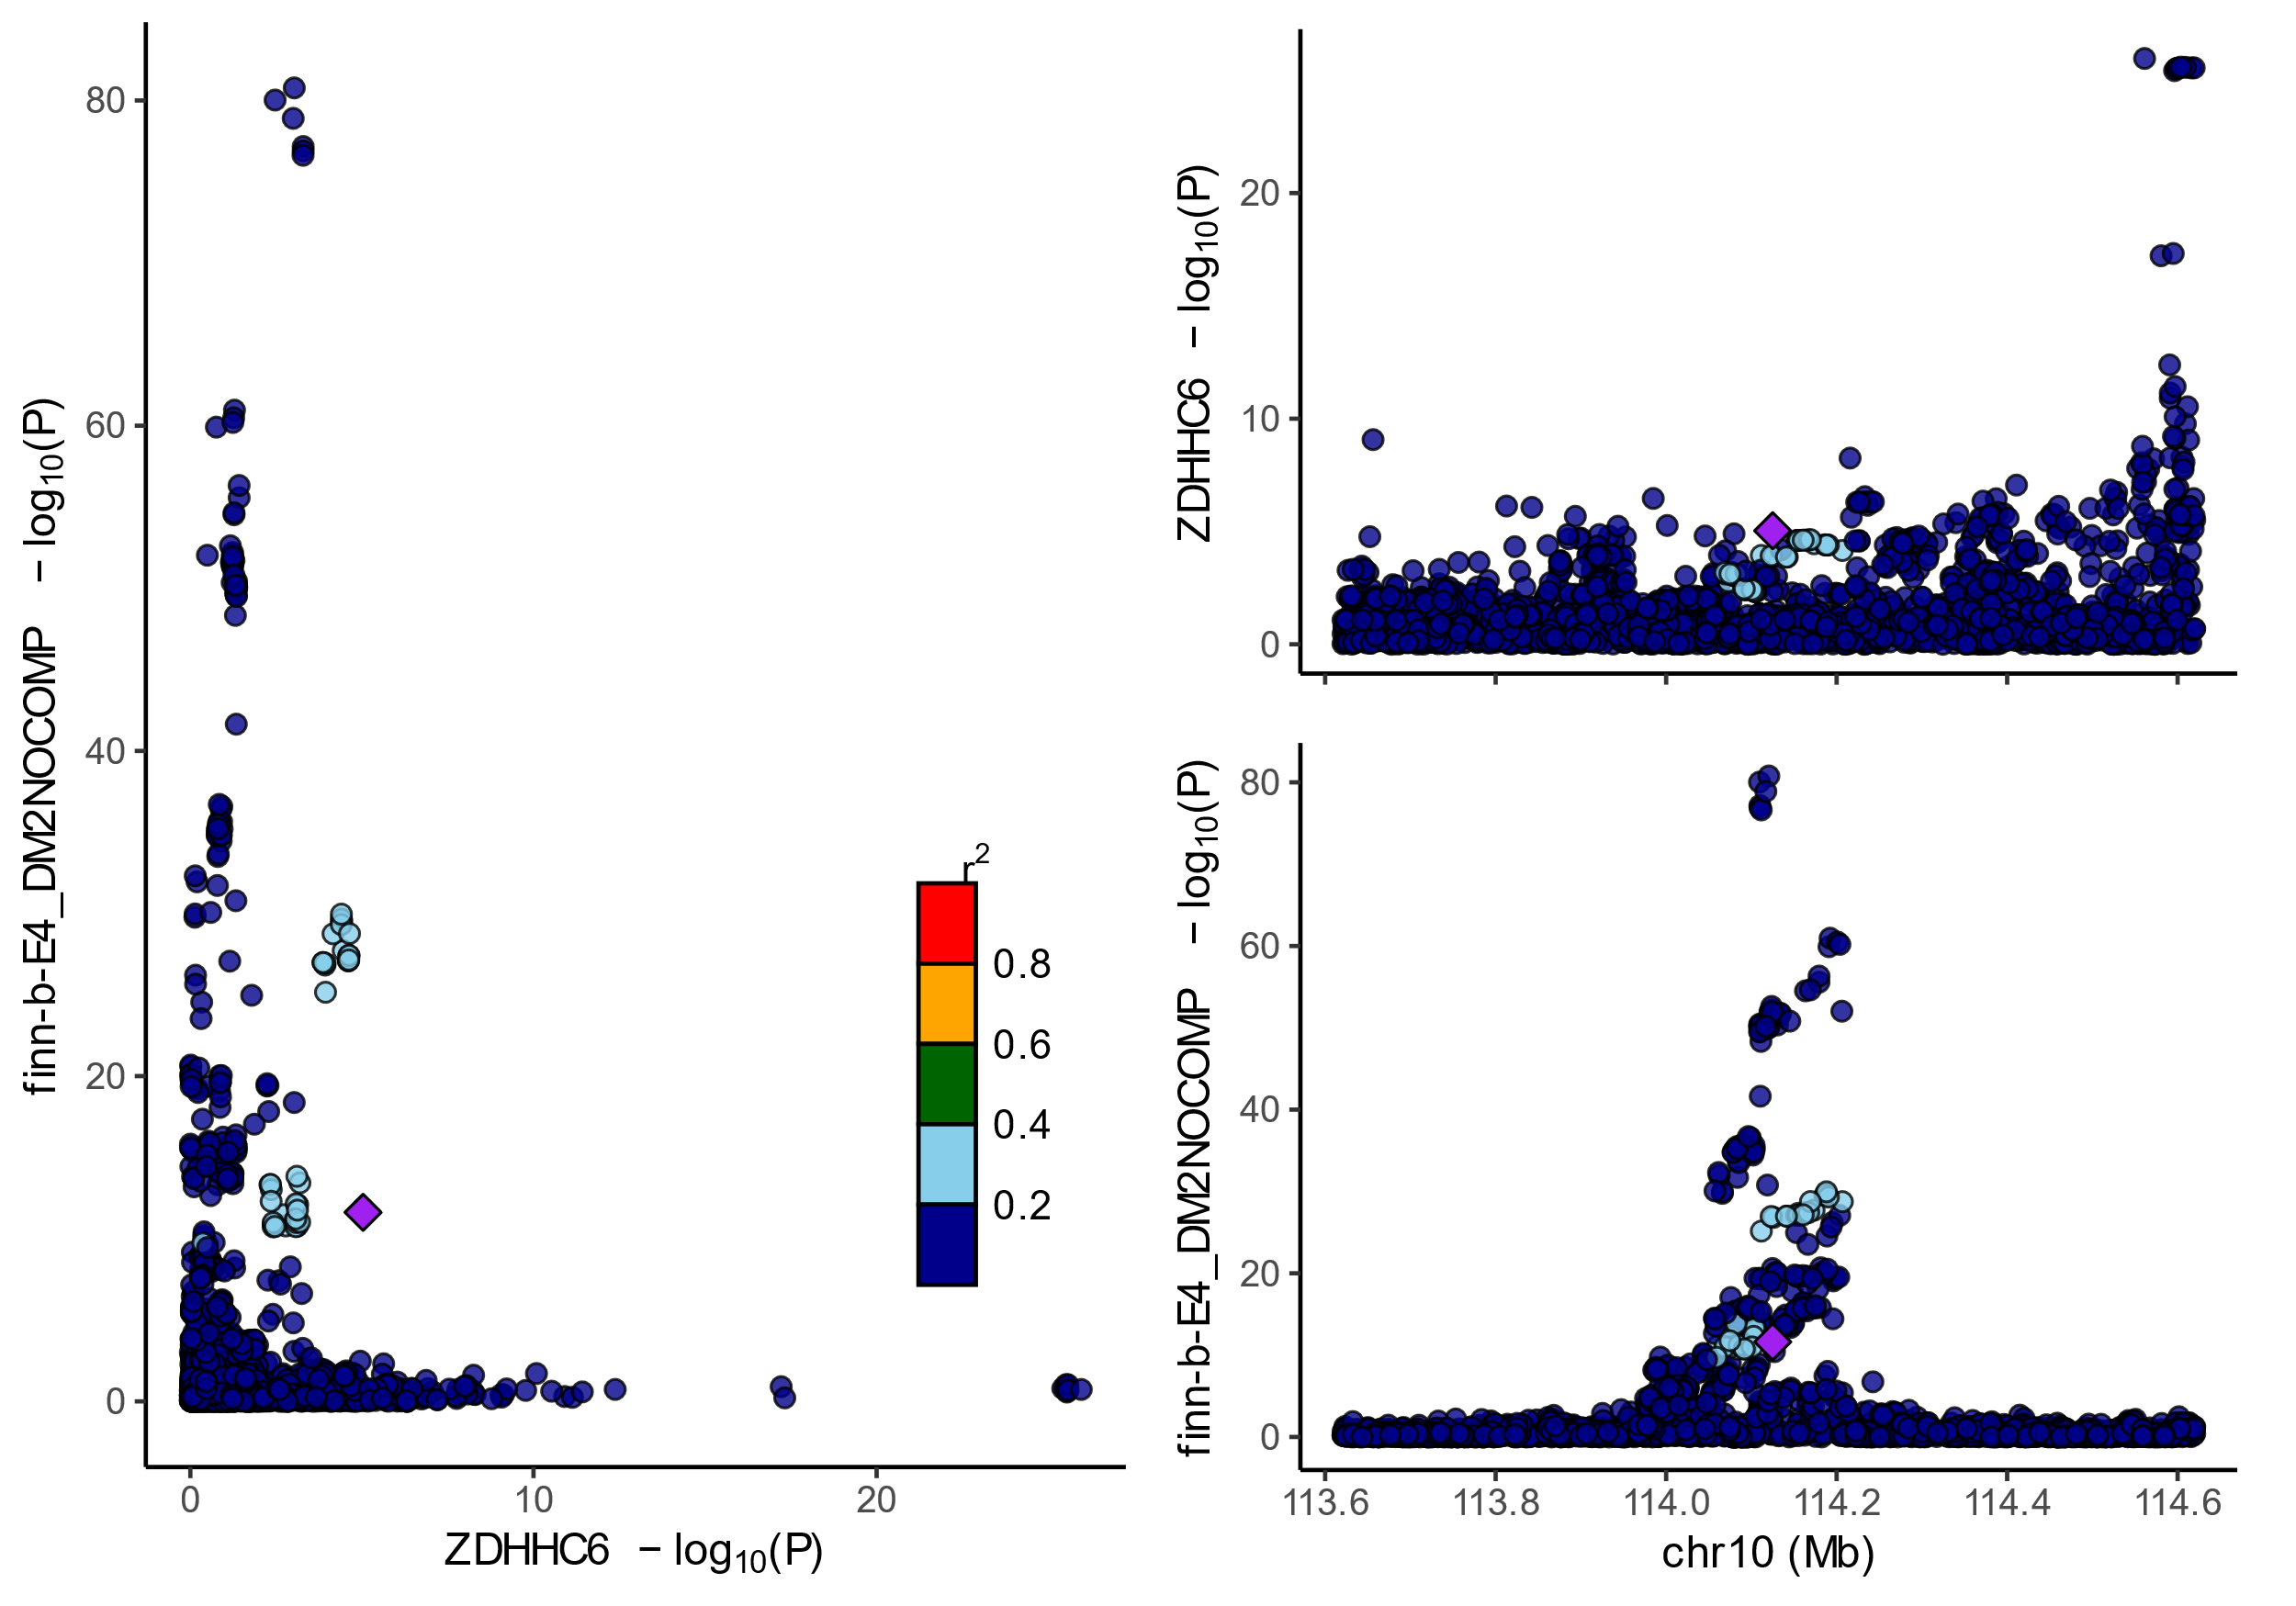

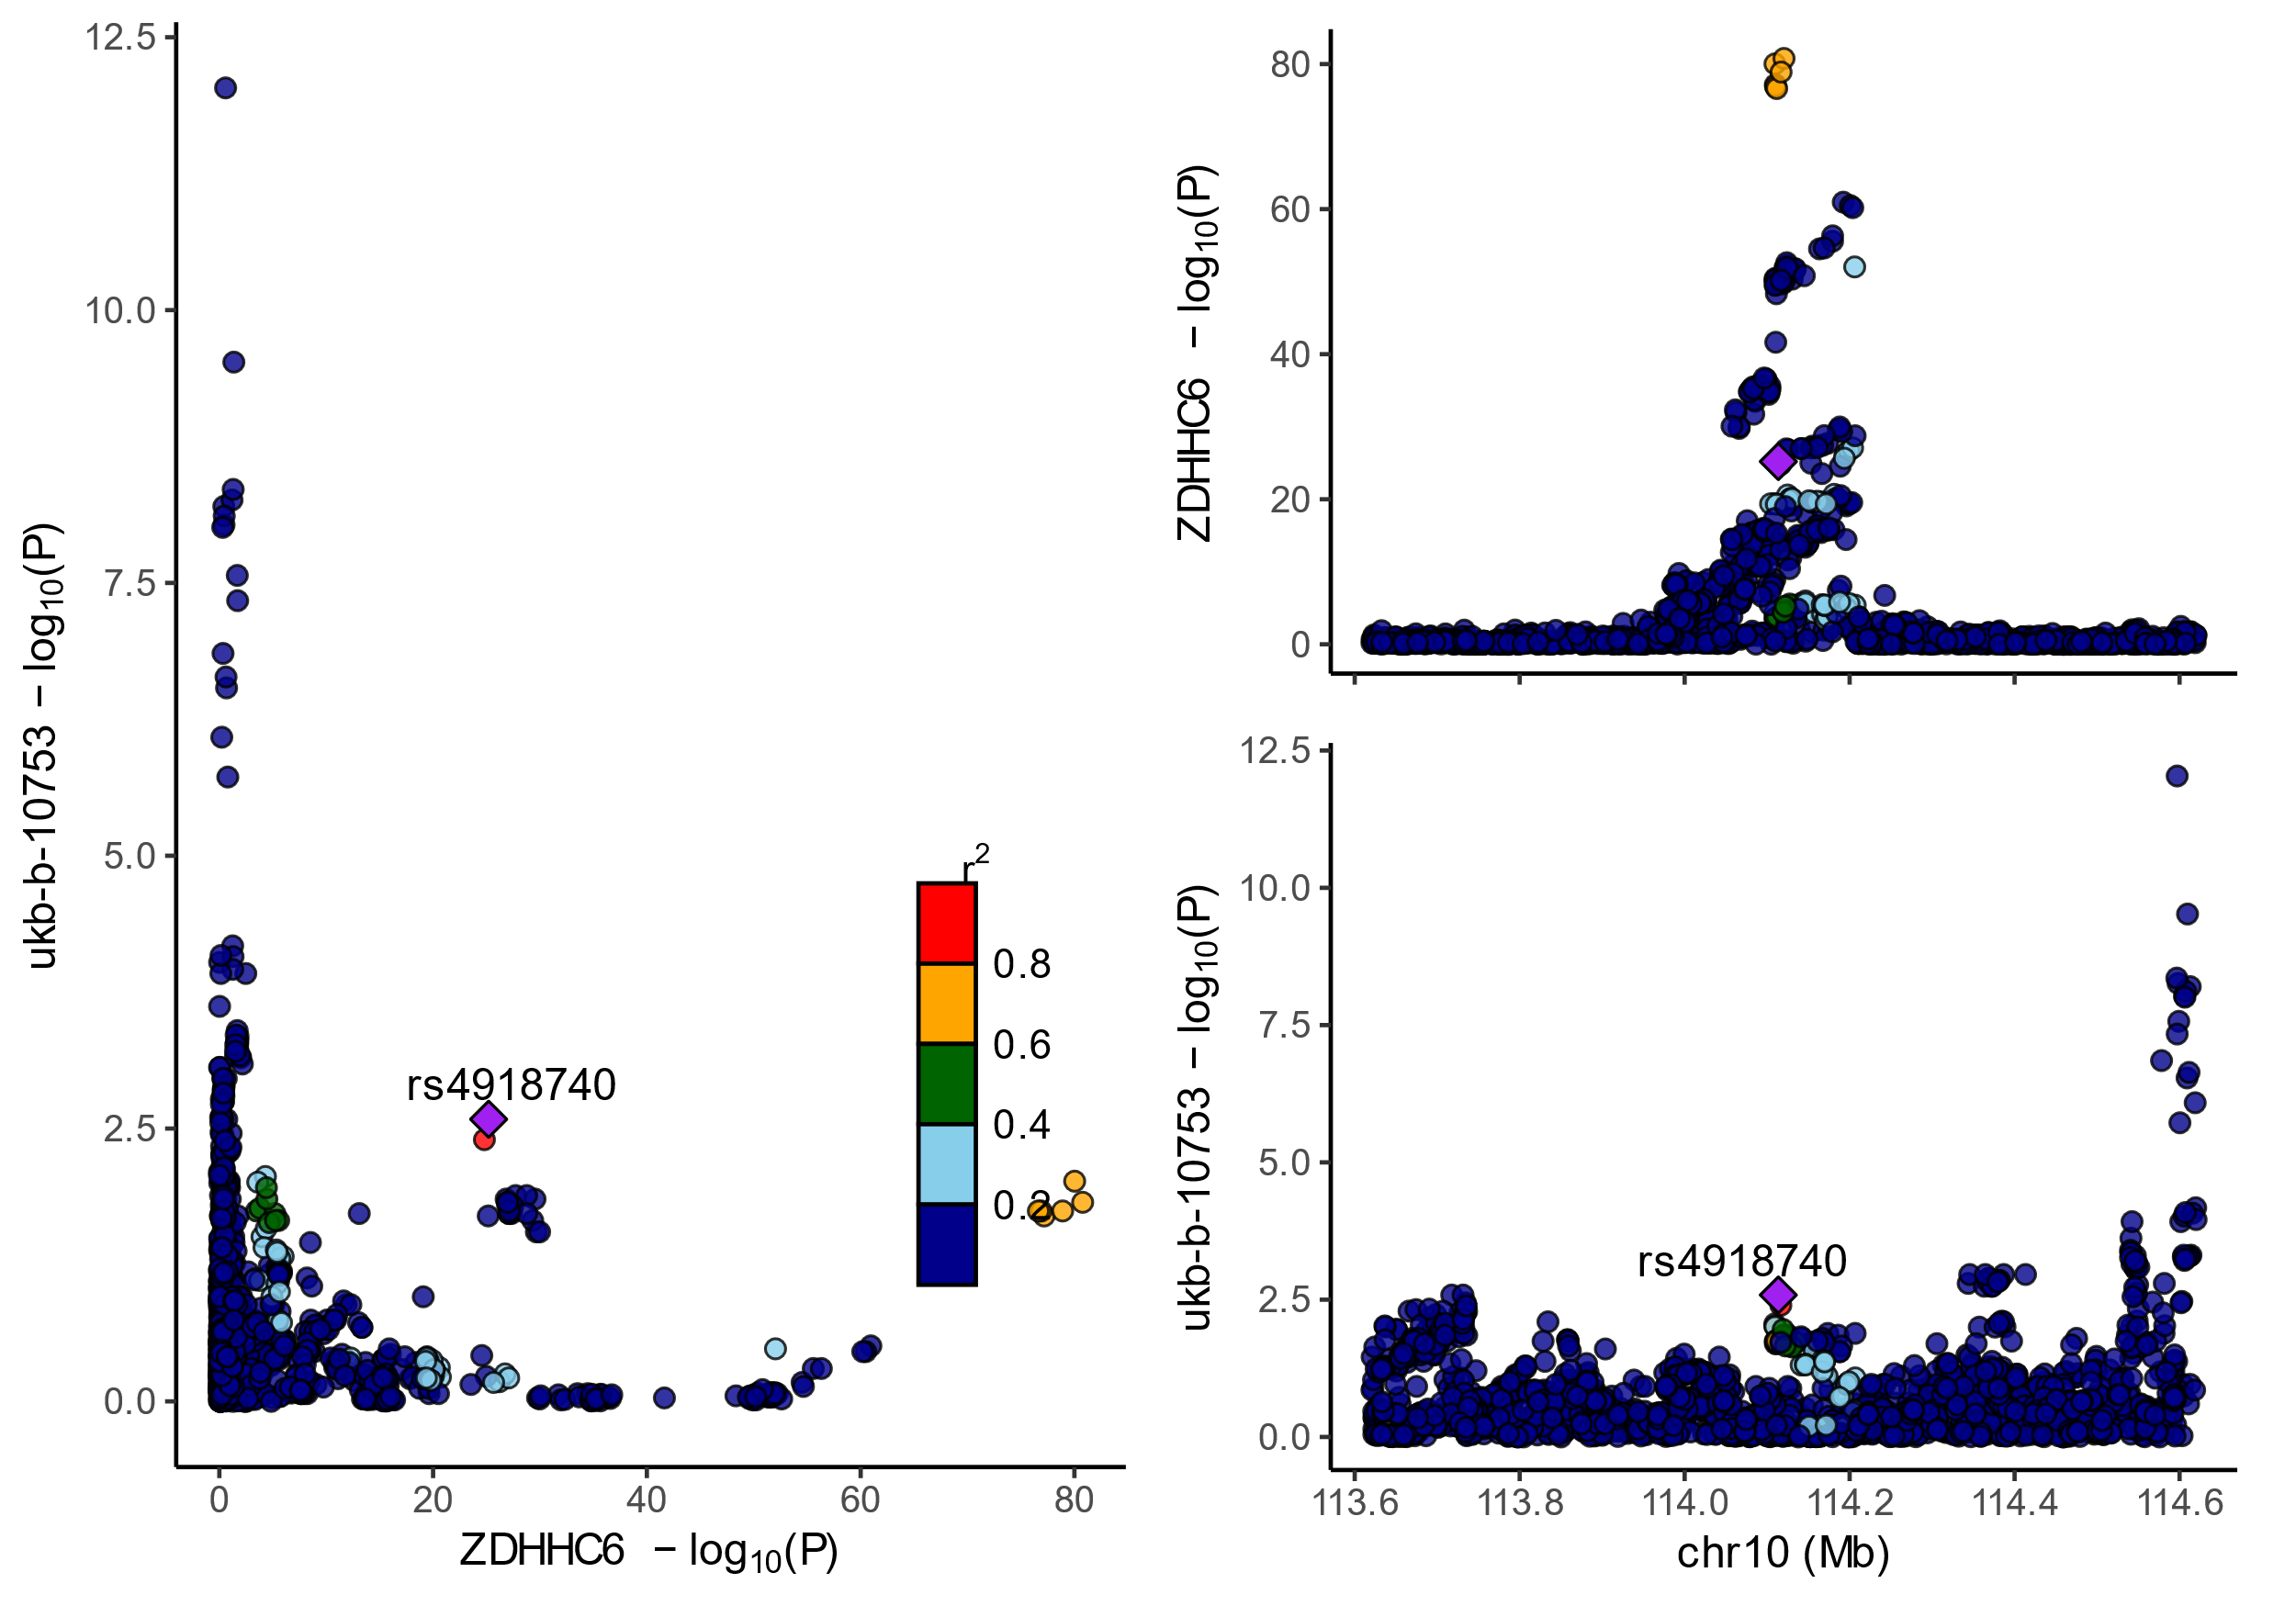

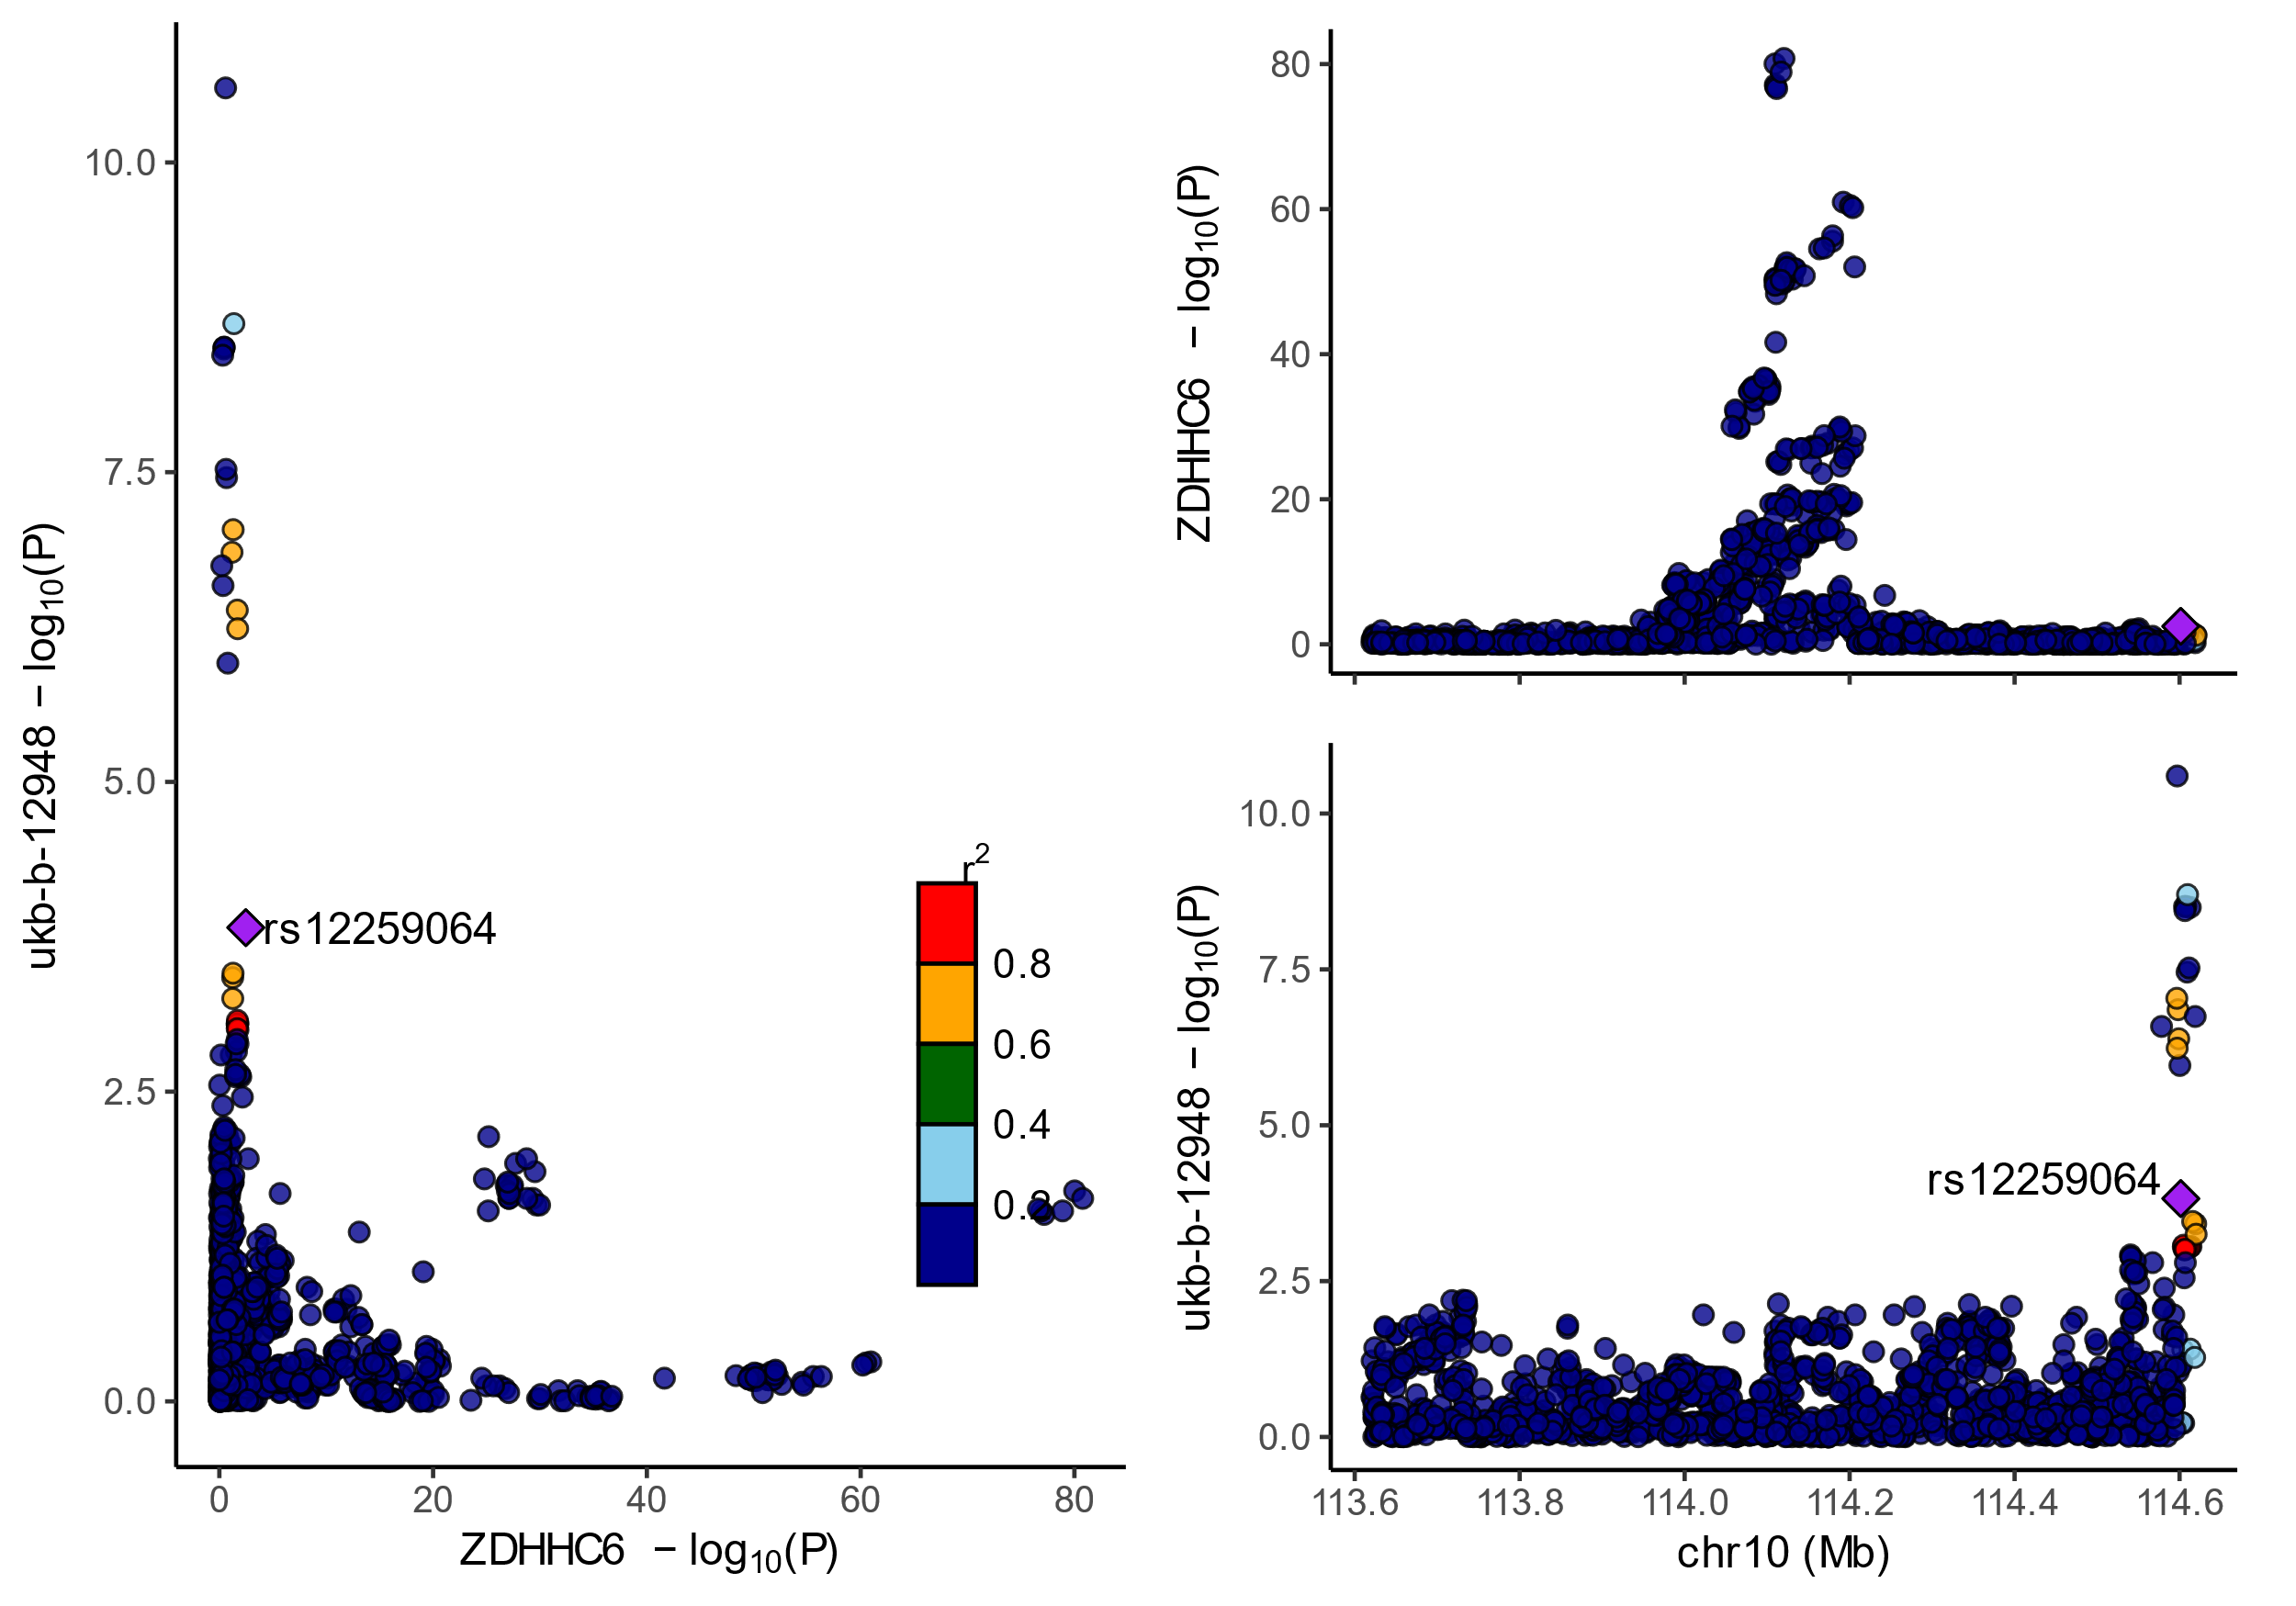

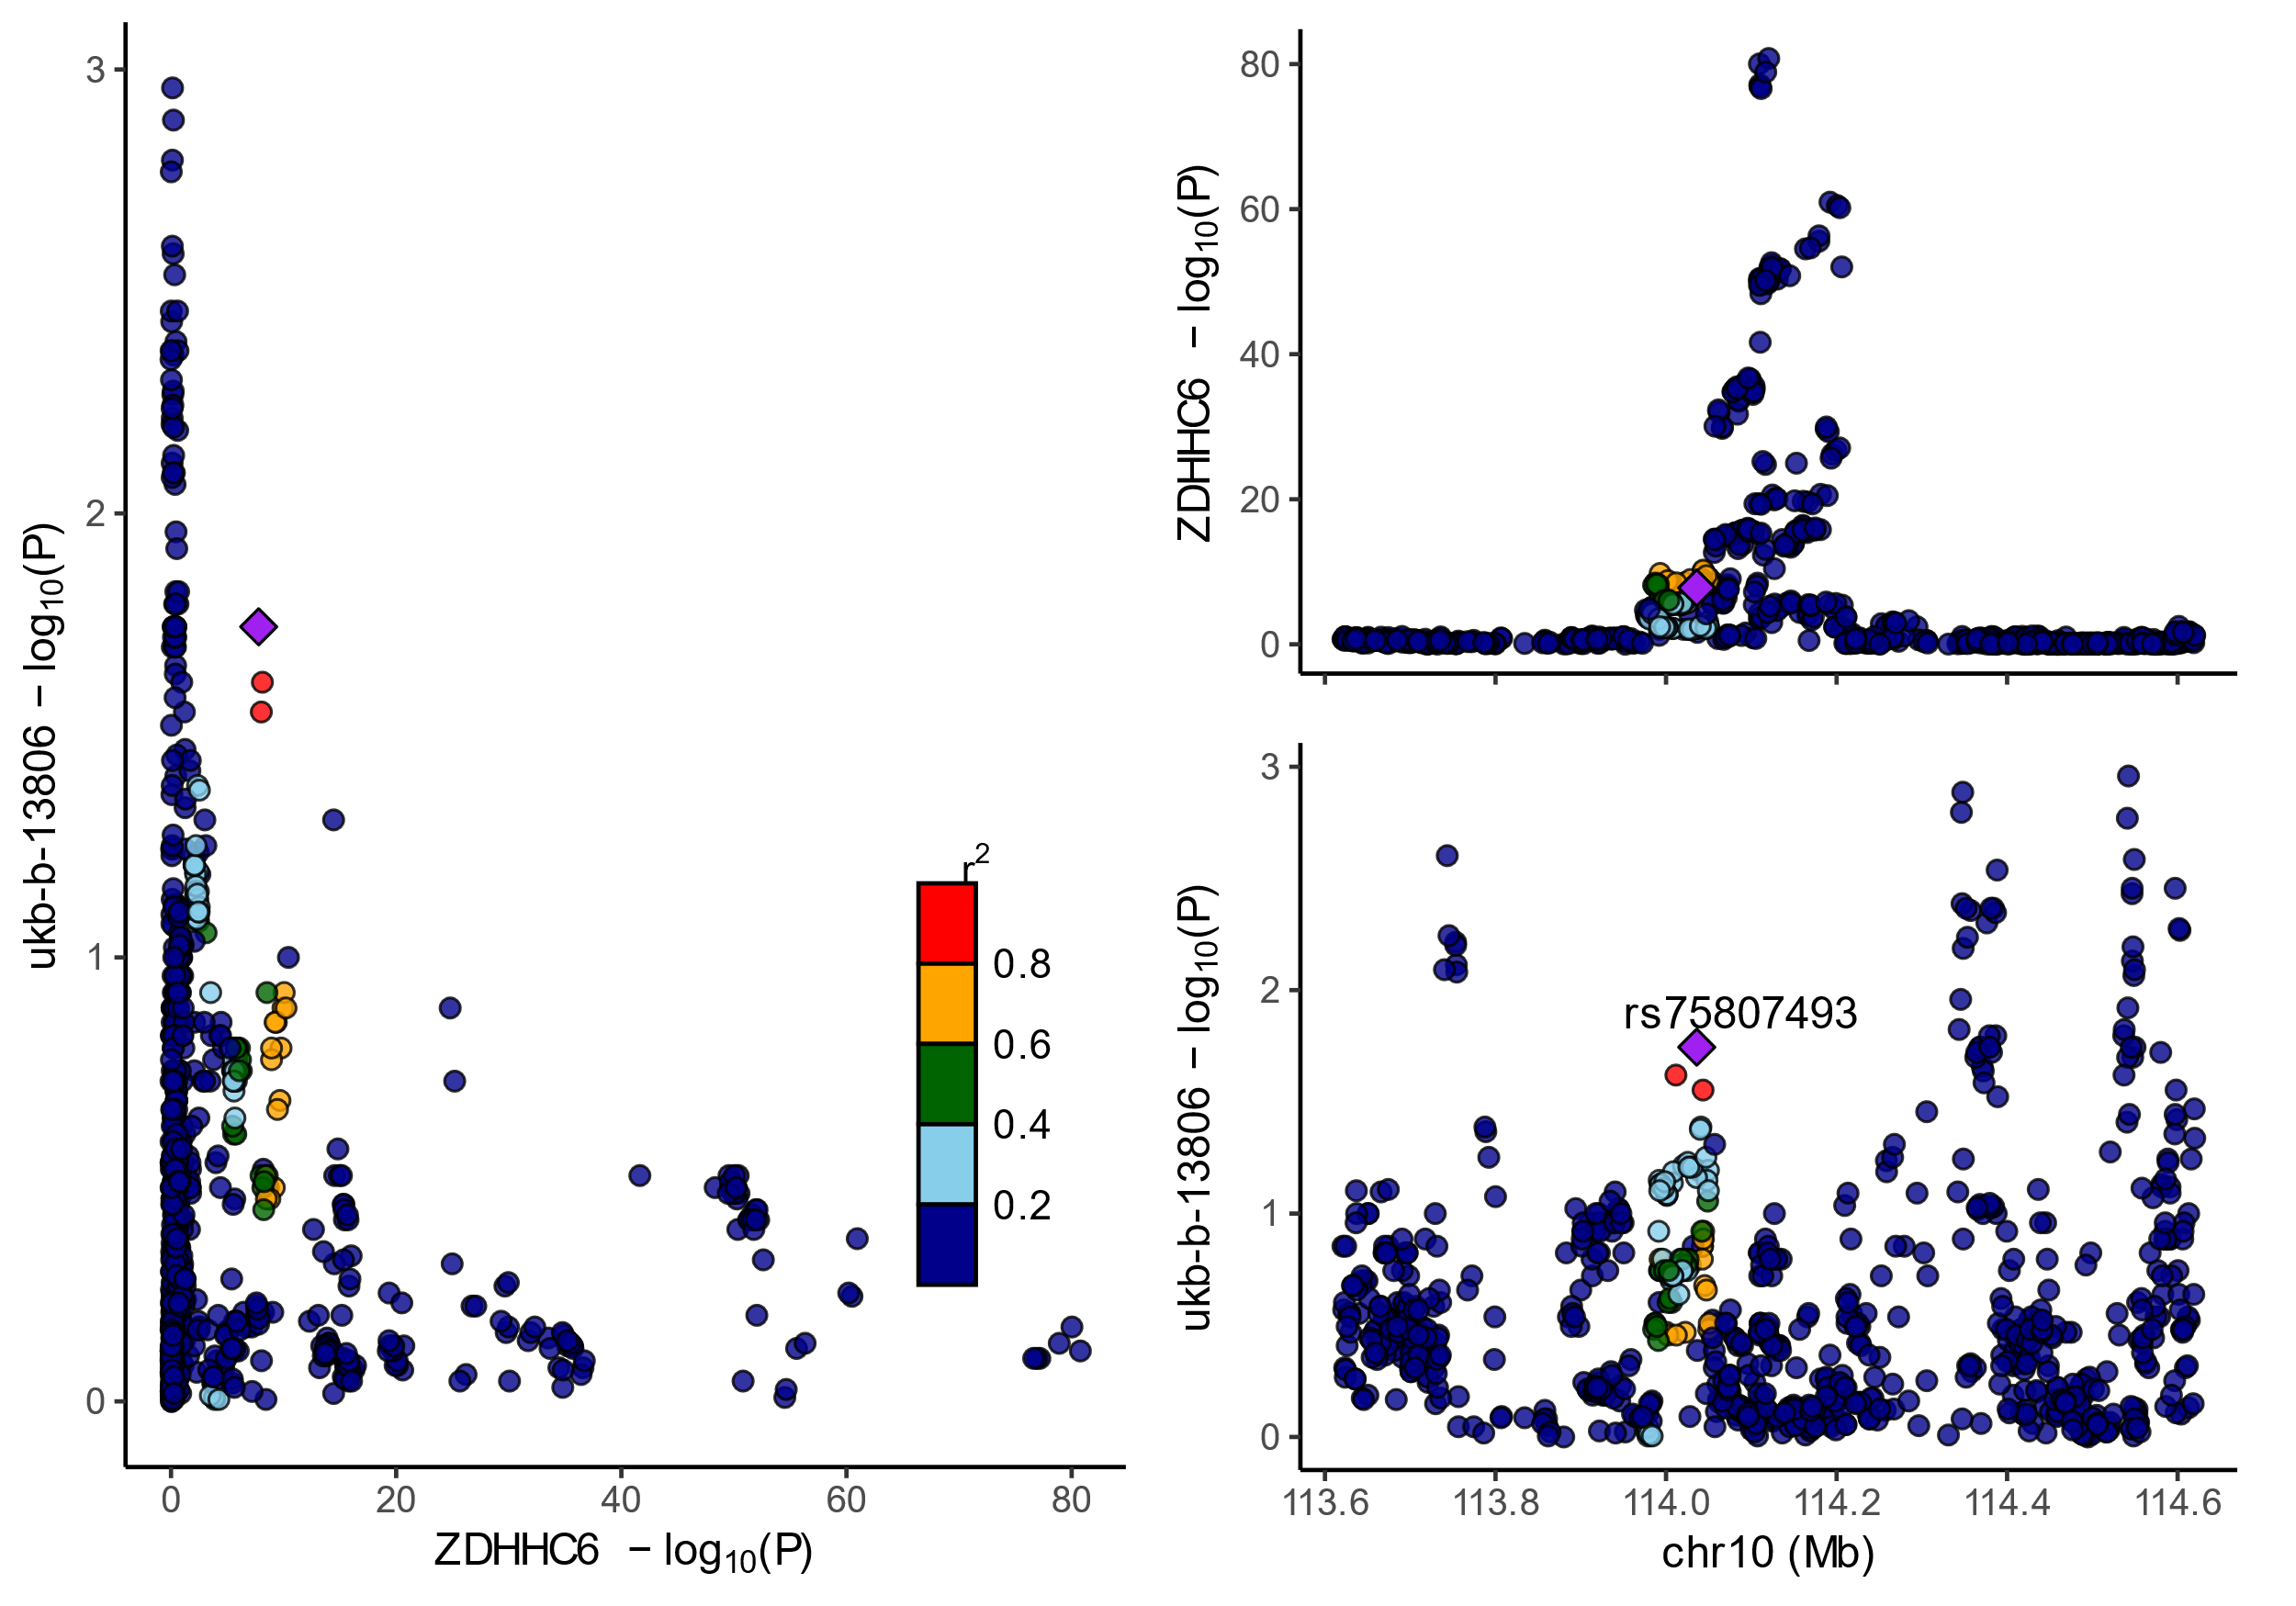

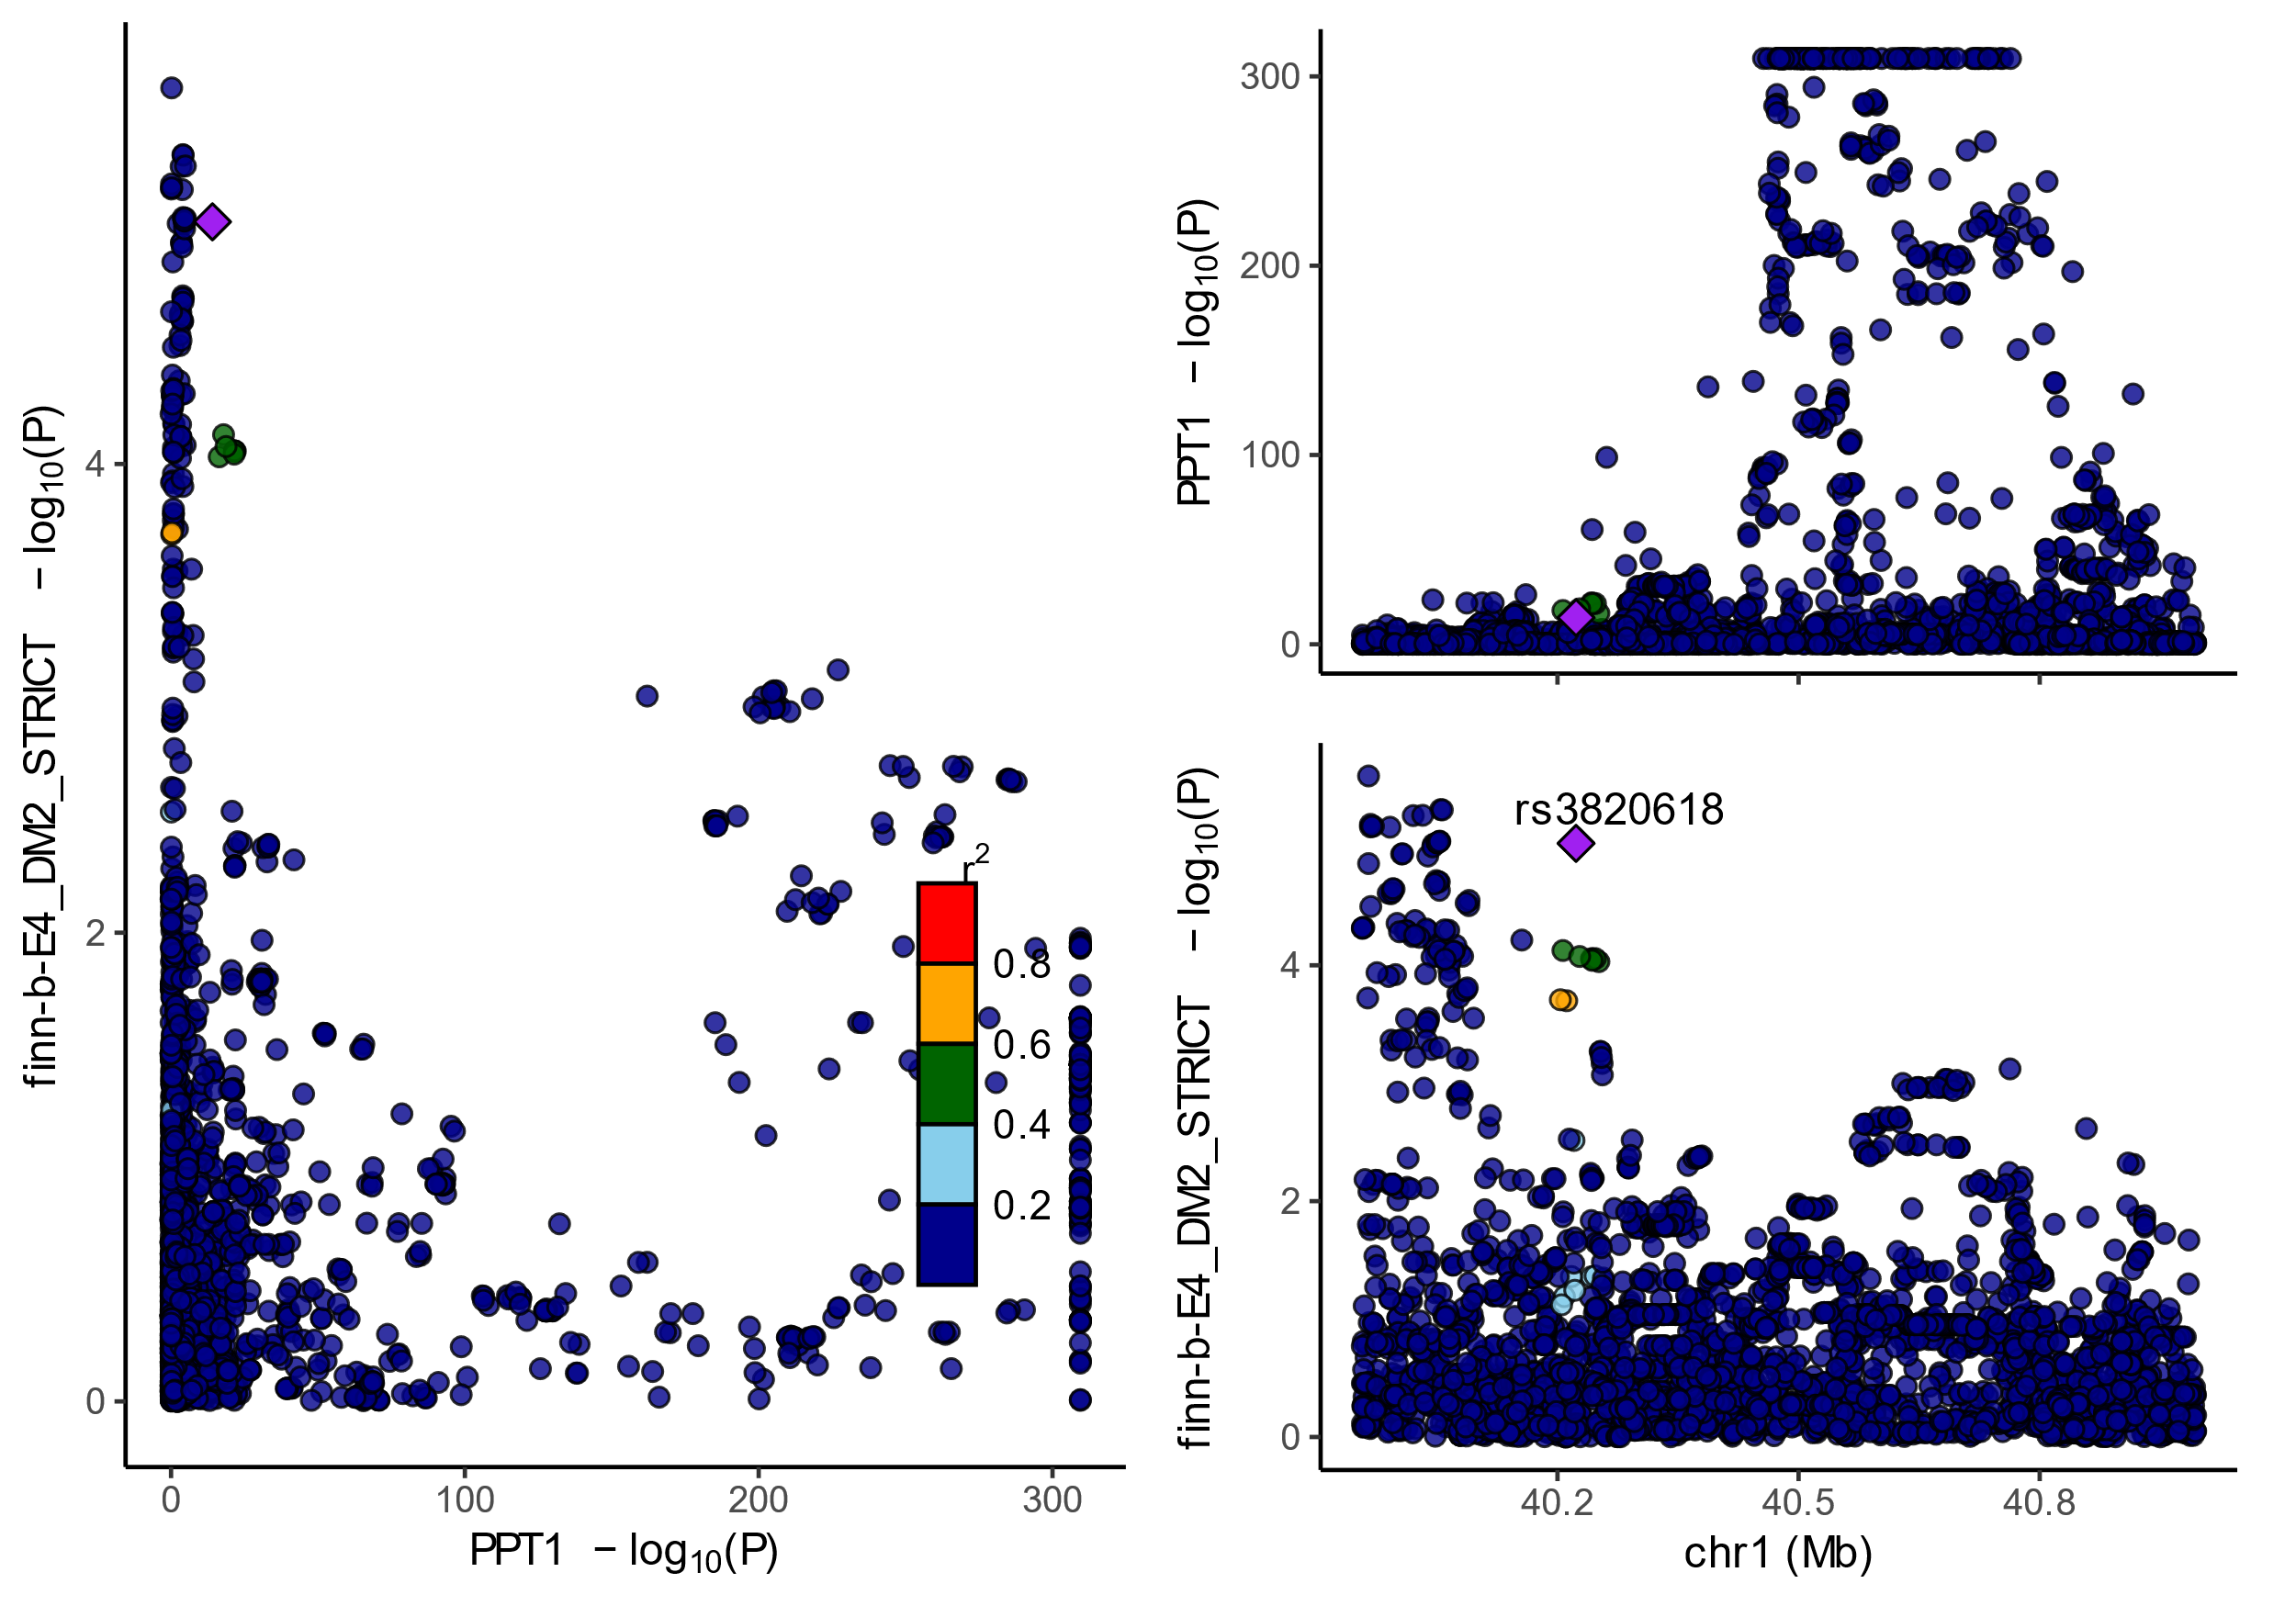

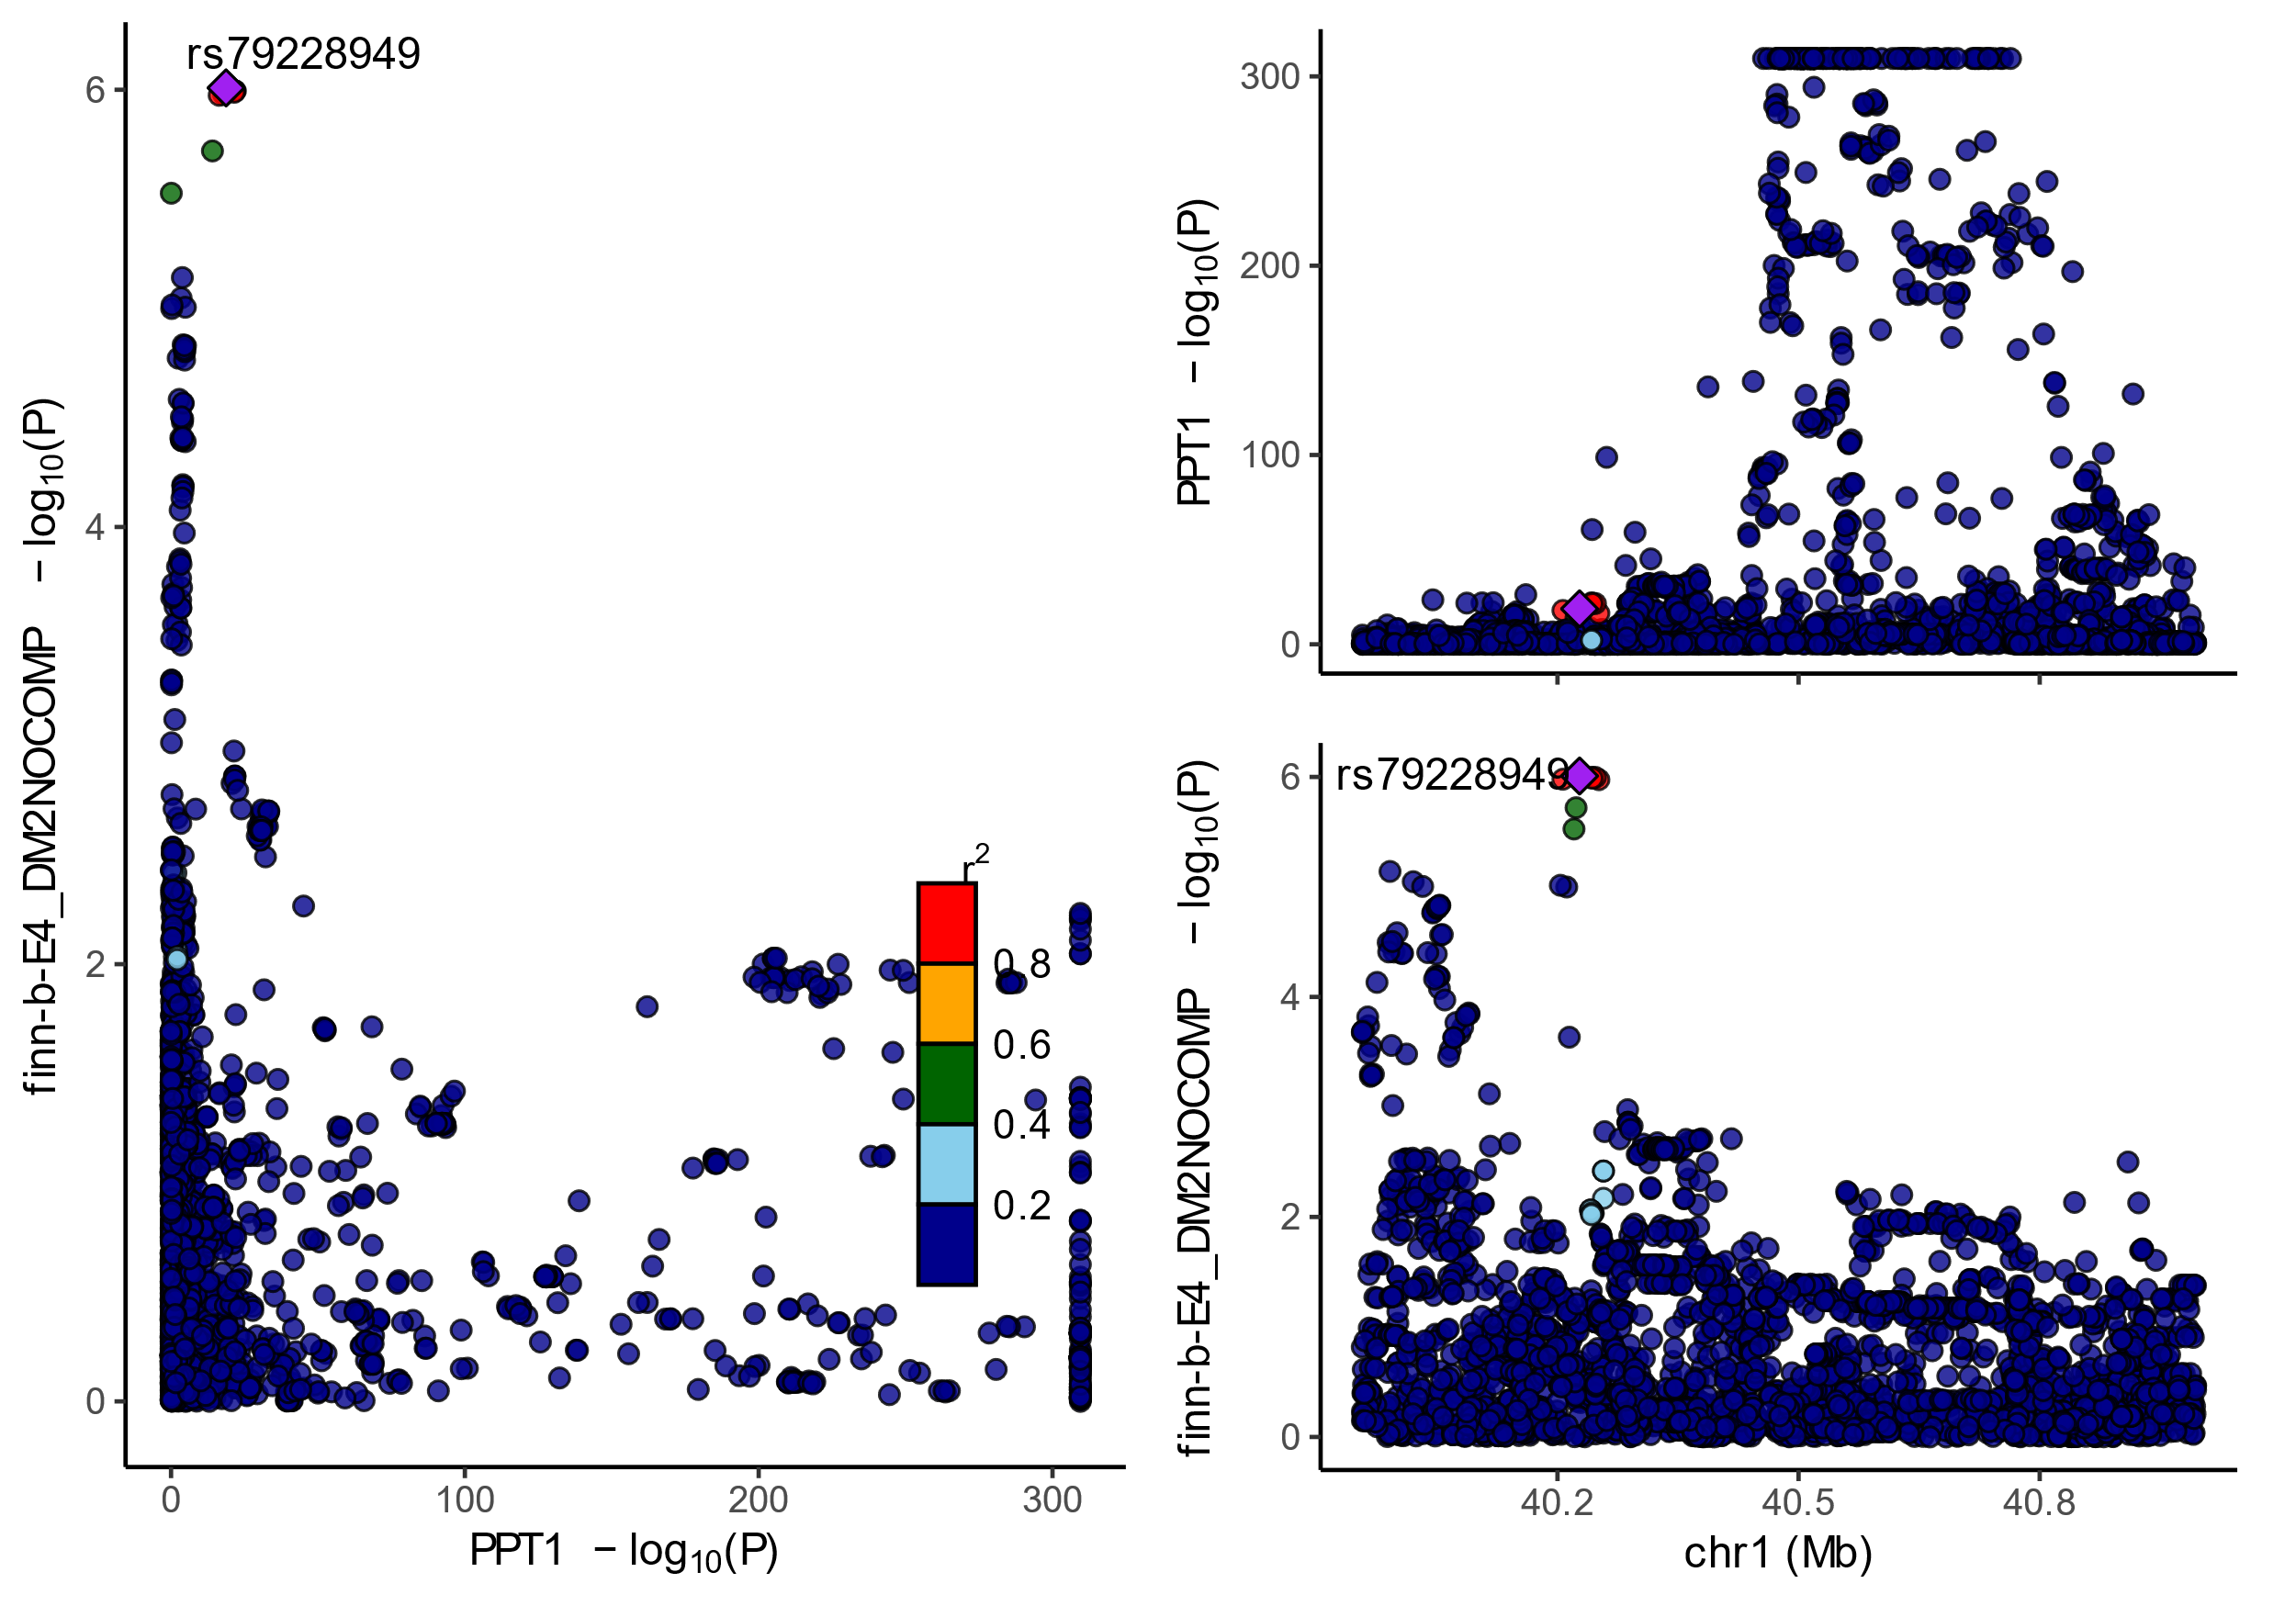

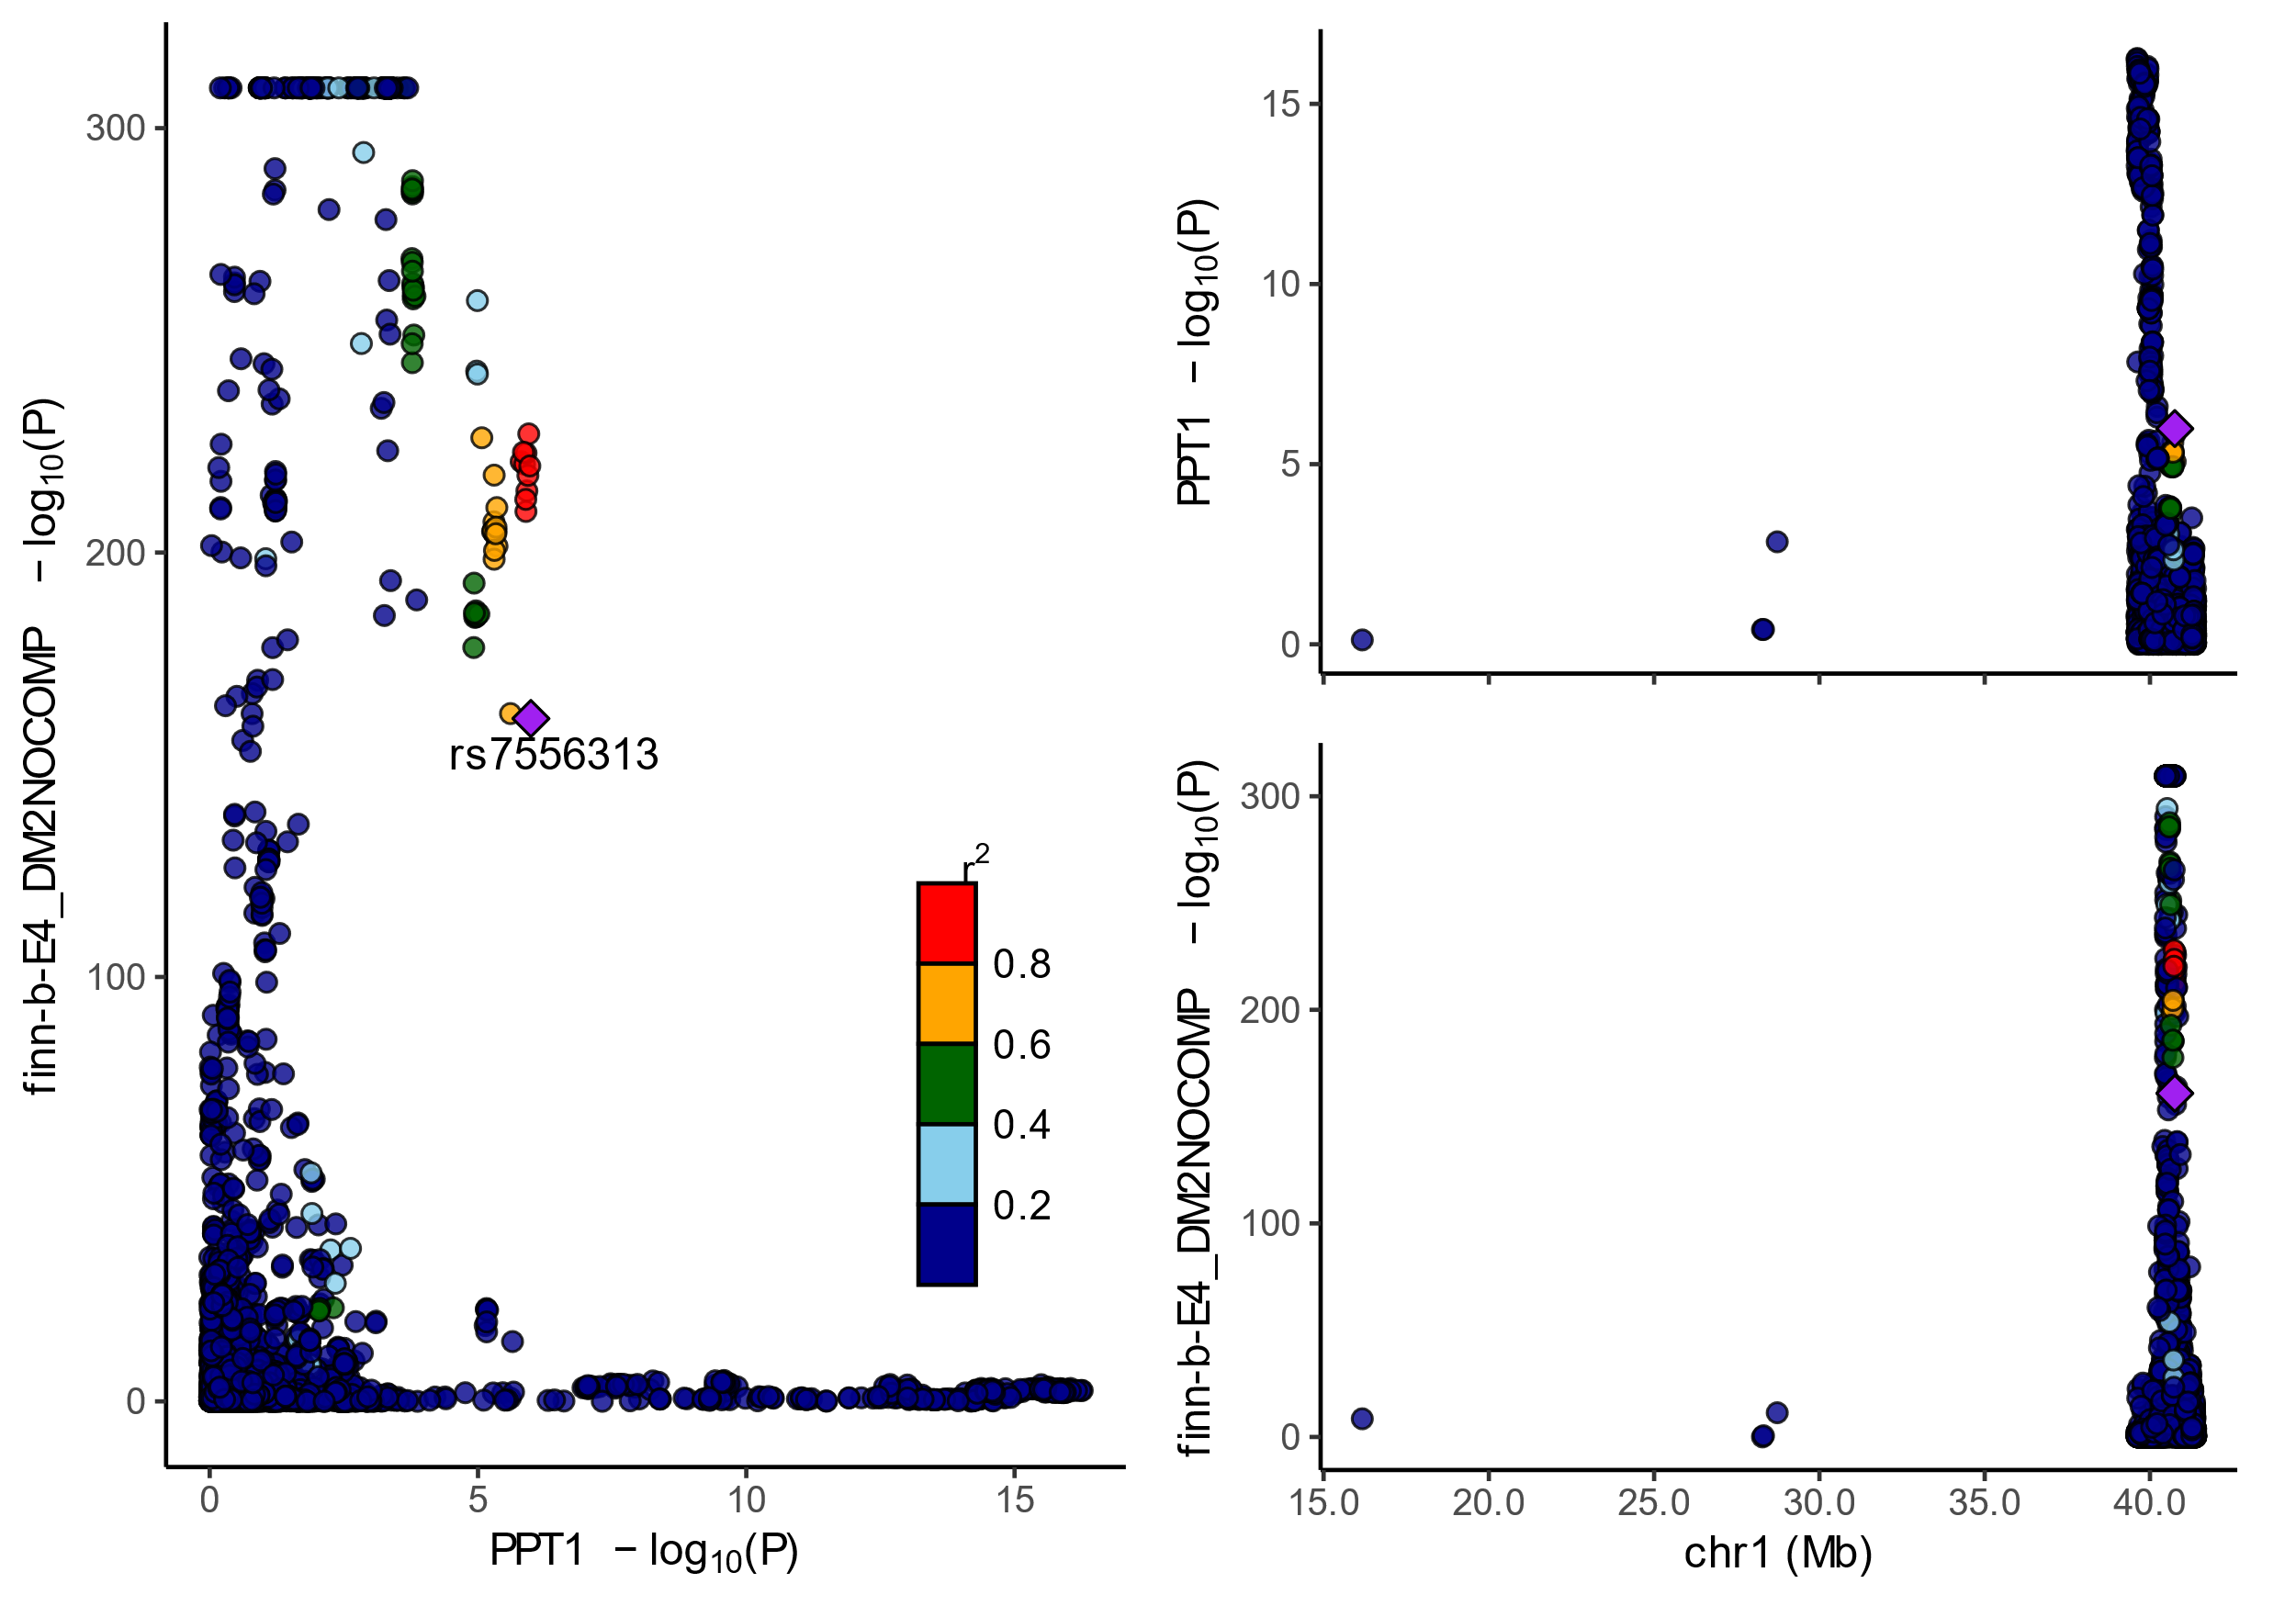

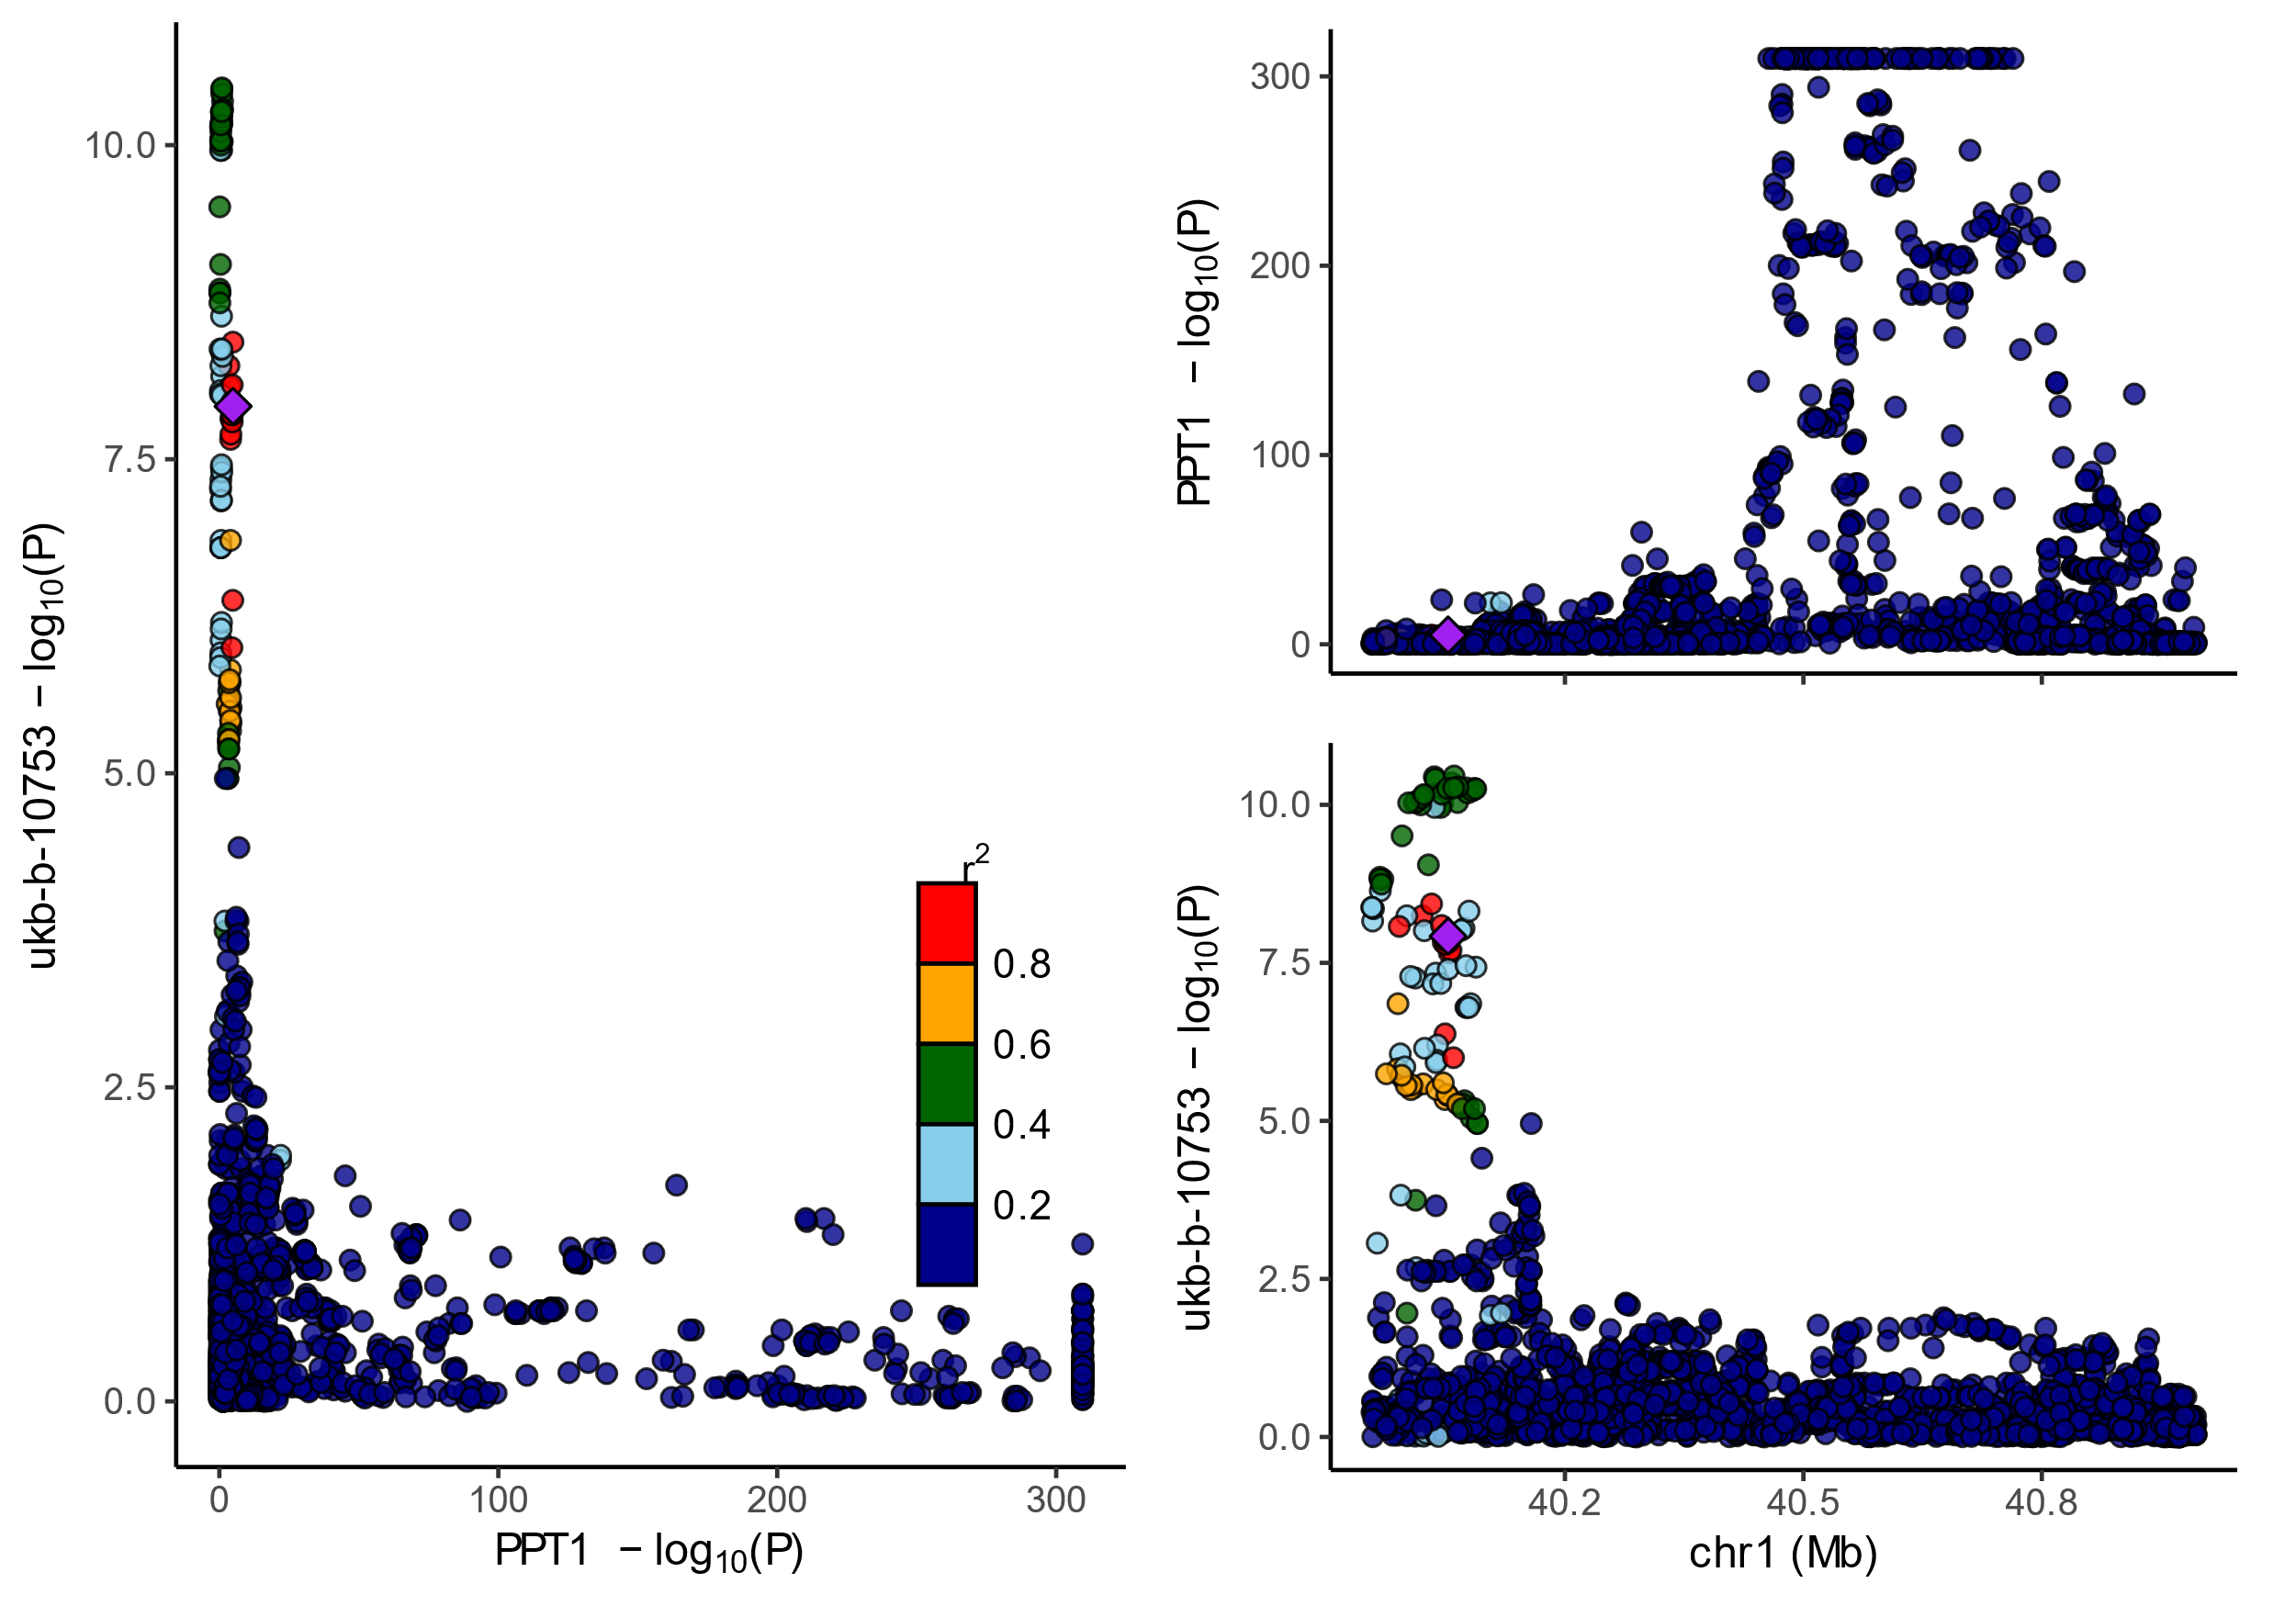

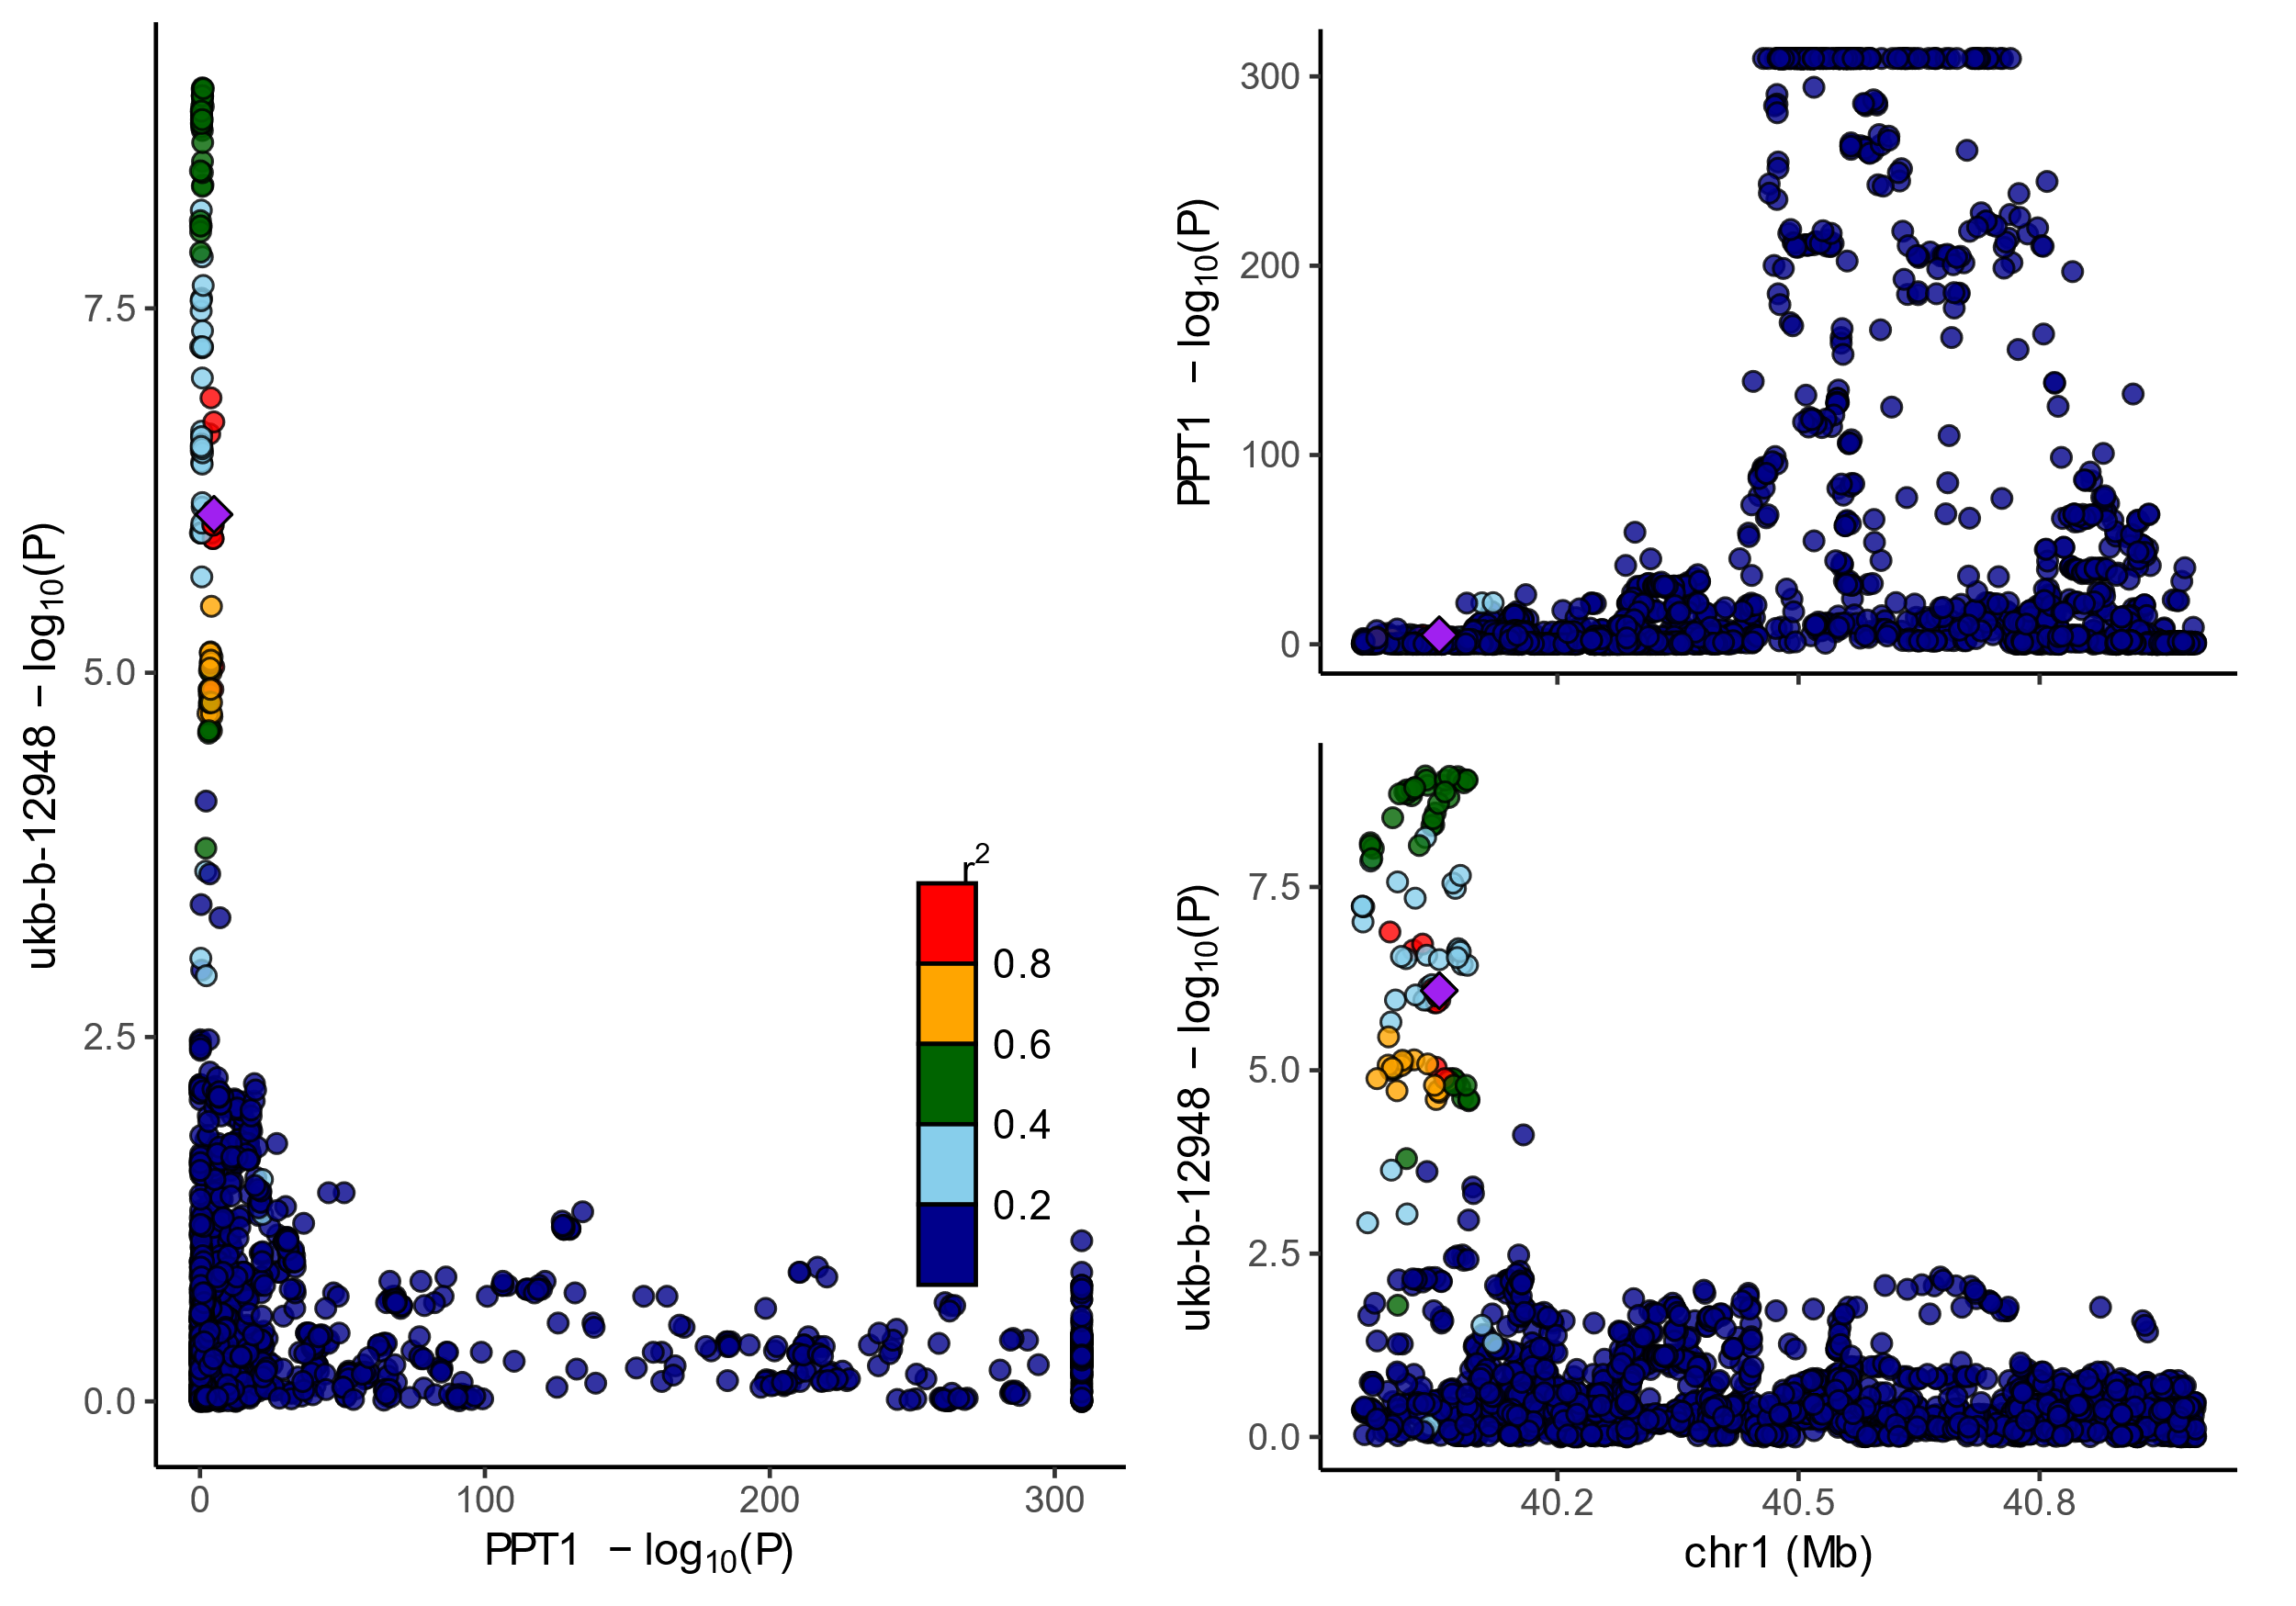

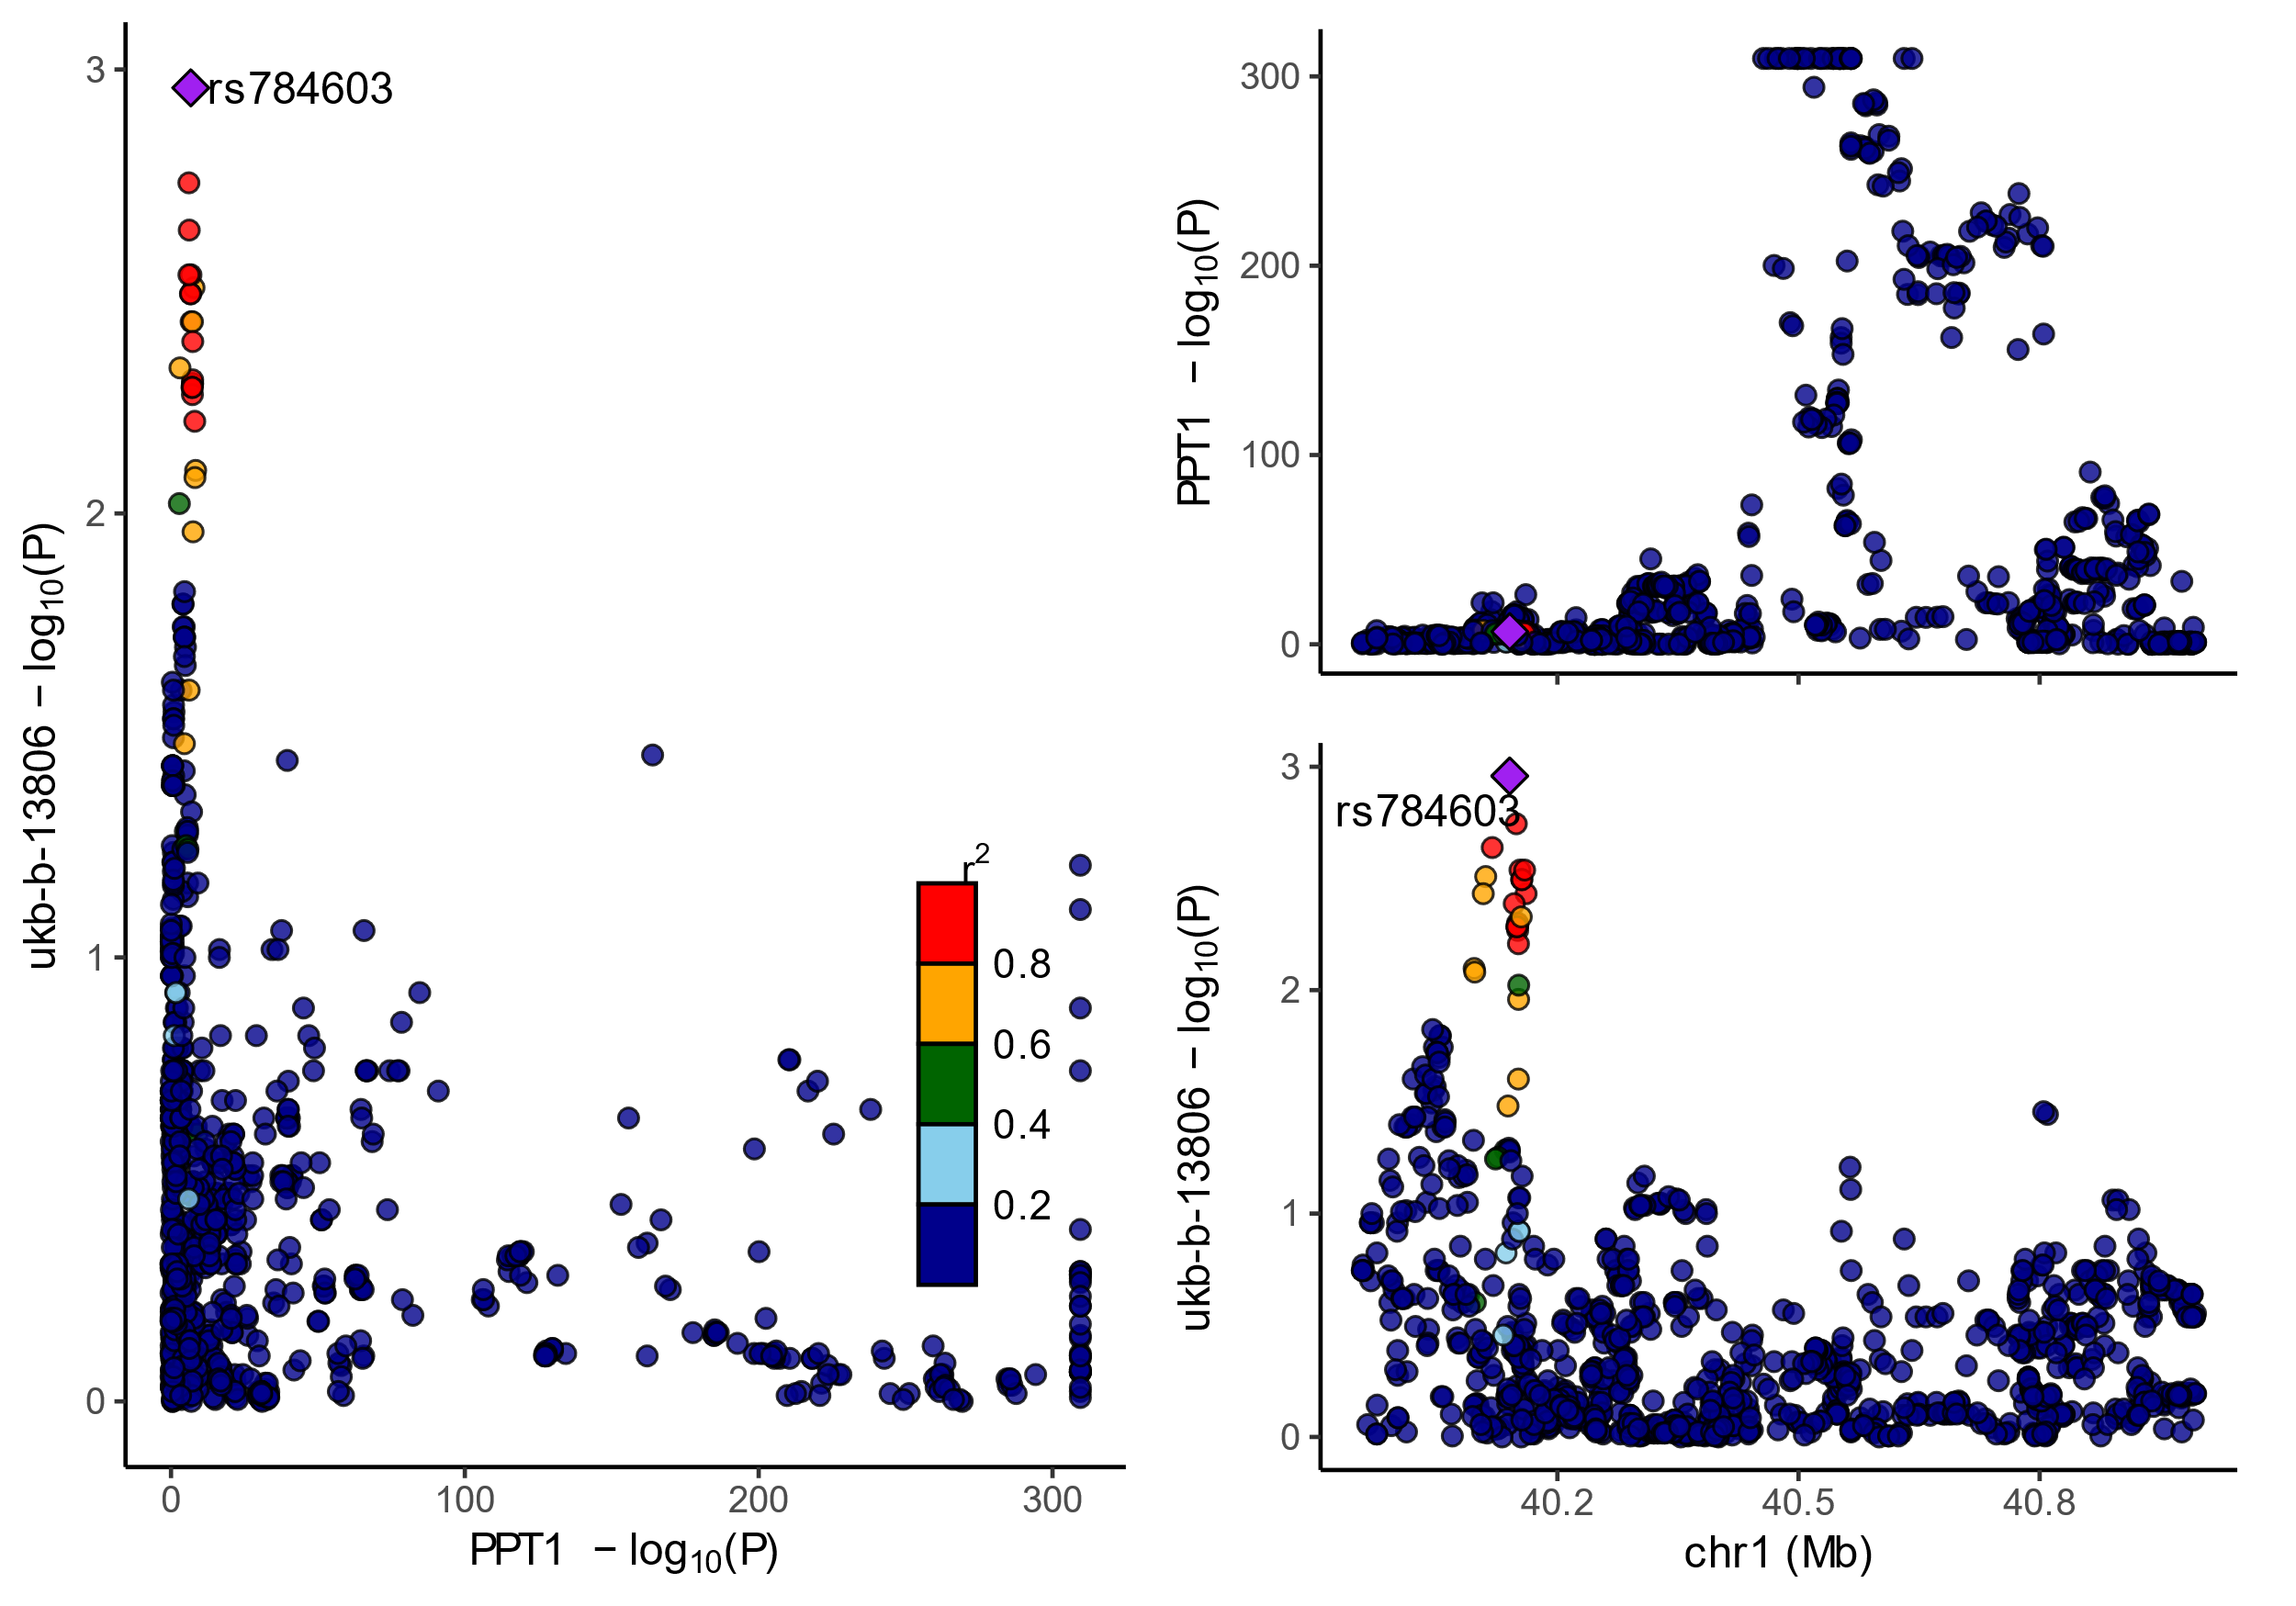

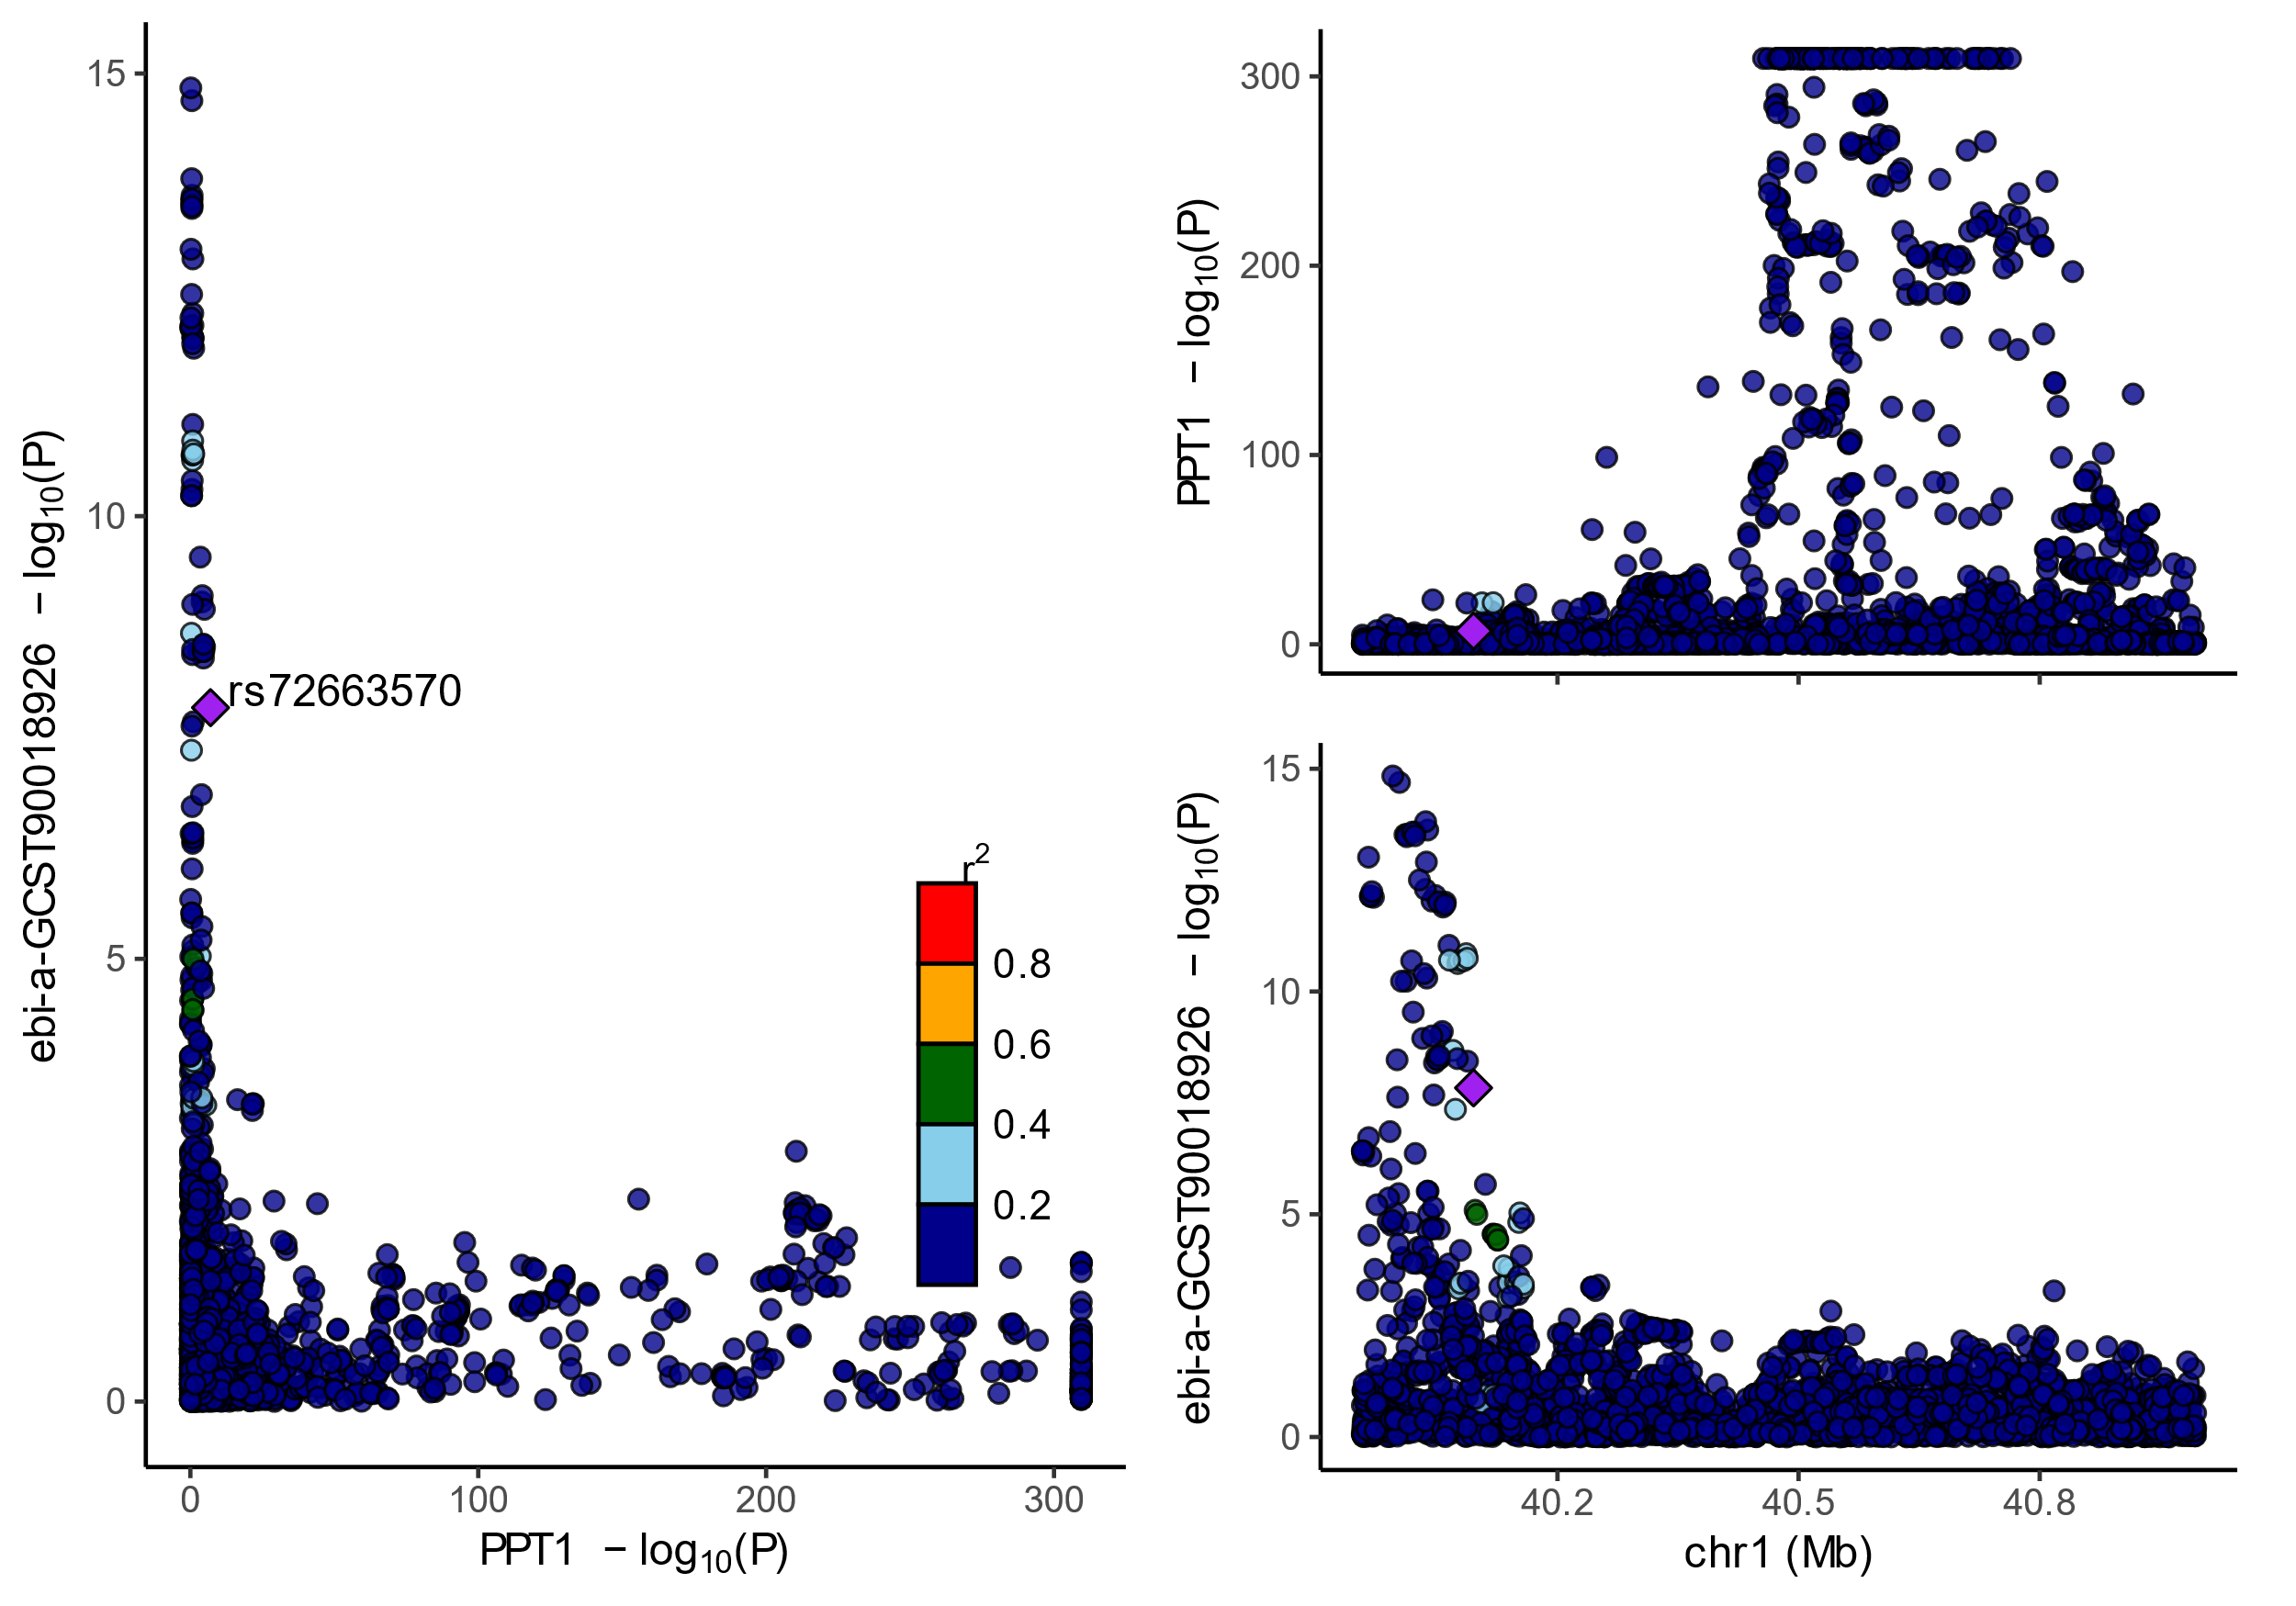

Supplement: Supplementary file 1 [file 7619d65cbeaf2dc40cca3539.docx]
